# Supplementary material for: The base-induced regioselective radical arylation of 3-aminochromone with aryl hydrazine
Source: Royal Society of Chemistry journal article supplement (doi:10.1039/d0ob01689f), 2020-01-01

## Supporting information

# Base-Induced Regioselective Radical Arylation of 3-Aminochromones with Arayl hydrazine

Nithya Muruges, Ramasamy Karvembu,<sup>a\*</sup> and Seenuvasan Vedachalam<sup>a\*</sup>

<sup>a</sup>Department of Chemistry, National Institute of Technology, Tiruchirappalli 620 015, India.

\*Corresponding authors; e-mail addresses: [yseenu@nitt.edu](mailto:yseenu@nitt.edu), [seenuvasanv@gmail.com](mailto:seenuvasanv@gmail.com) and [kar@nitt.edu](mailto:kar@nitt.edu)

## Supporting Information

### Table of Contents:

|     |                                                     |      |
|-----|-----------------------------------------------------|------|
| I.  | GC-MS chromatogram of optimized conditions          | S-1  |
| II. | NMR and HRMS spectra of the cross-coupling products | S-21 |

### GC-MS Analysis:

GC-MS data shown here is respect to reactant (3-amino-8-methoxy-2-phenyl-4H-chromen-4-one) irrespective of phenyl hydrazine, since we used 2.5 equivalent of Phenyl hydrazine.

## Supporting information

### GC-MS chromatogram of optimized conditions:

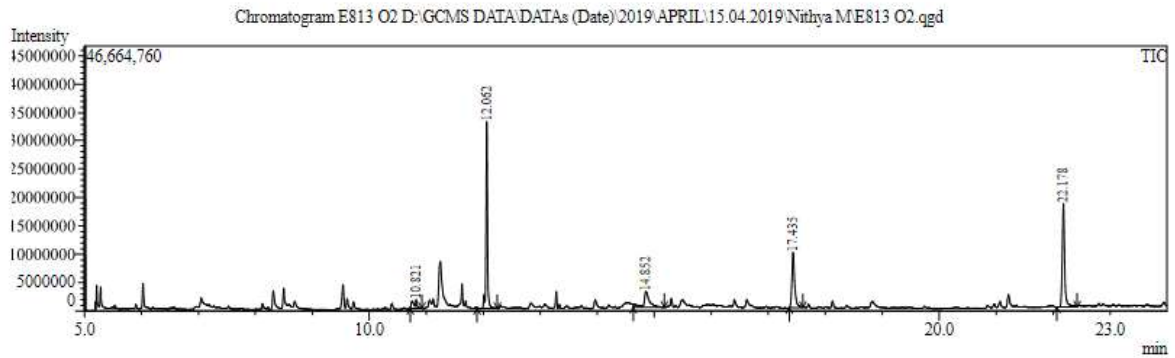

Line#:1 R.Time:10.820(Scan#:1163)

MassPeaks:118

RawMode:Averaged 10.815-10.825(1164-1166) BasePeak:191.00(430189)

BG Mode:Calc. from Peak Group 1 - Event 1

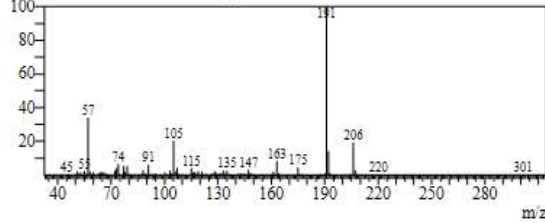

Line#:2 R.Time:12.060(Scan#:1413)

MassPeaks:127

RawMode:Averaged 12.055-12.065(1412-1414) BasePeak:77.05(8239592)

BG Mode:Calc. from Peak Group 1 - Event 1

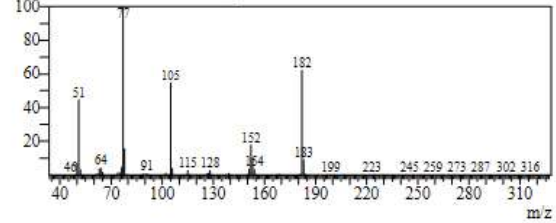

Line#:3 R.Time:14.850(Scan#:1971)

MassPeaks:171

RawMode:Averaged 14.845-14.855(1970-1972) BasePeak:190.95(458019)

BG Mode:Calc. from Peak Group 1 - Event 1

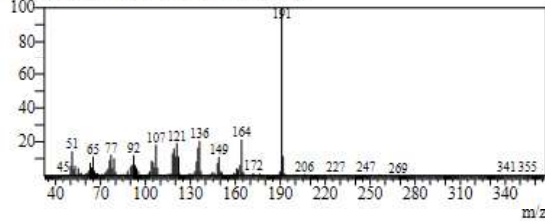

Line#:4 R.Time:17.435(Scan#:2488)

MassPeaks:176

RawMode:Averaged 17.430-17.440(2487-2489) BasePeak:91.00(3190384)

BG Mode:Calc. from Peak Group 1 - Event 1

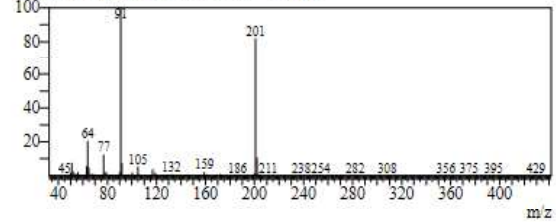

Line#:5 R.Time:22.180(Scan#:3437)

MassPeaks:286

RawMode:Averaged 22.175-22.185(3436-3438) BasePeak:266.90(3662248)

BG Mode:Calc. from Peak Group 1 - Event 1

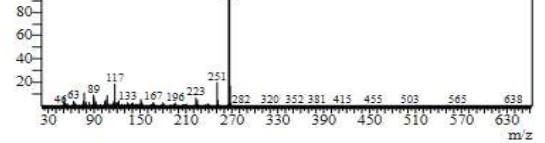

Peak Report TIC

| Peak# | R.Time | Area      | Area%  | Name                                        |
|-------|--------|-----------|--------|---------------------------------------------|
| 1     | 10.821 | 7245381   | 4.21   | Phenol, 2,4-bis(1,1-dimethylethyl)-         |
| 2     | 12.062 | 60971807  | 35.45  | Diazene, diphenyl- (CAS)                    |
| 3     | 14.852 | 18281227  | 10.63  | N,N'-Ethylenebis(2-[2-hydroxyphenyl]glycin  |
| 4     | 17.435 | 32318015  | 18.79  | Butanenitrile, 2-(4-methylphenylhydrazono)- |
| 5     | 22.178 | 53164261  | 30.91  | (E)-6-METHOXY-2-(3'-AMINO BENZYLID          |
|       |        | 171980691 | 100.00 |                                             |

GC-MS chromatogram data for entry 1 in table 1

## Supporting information

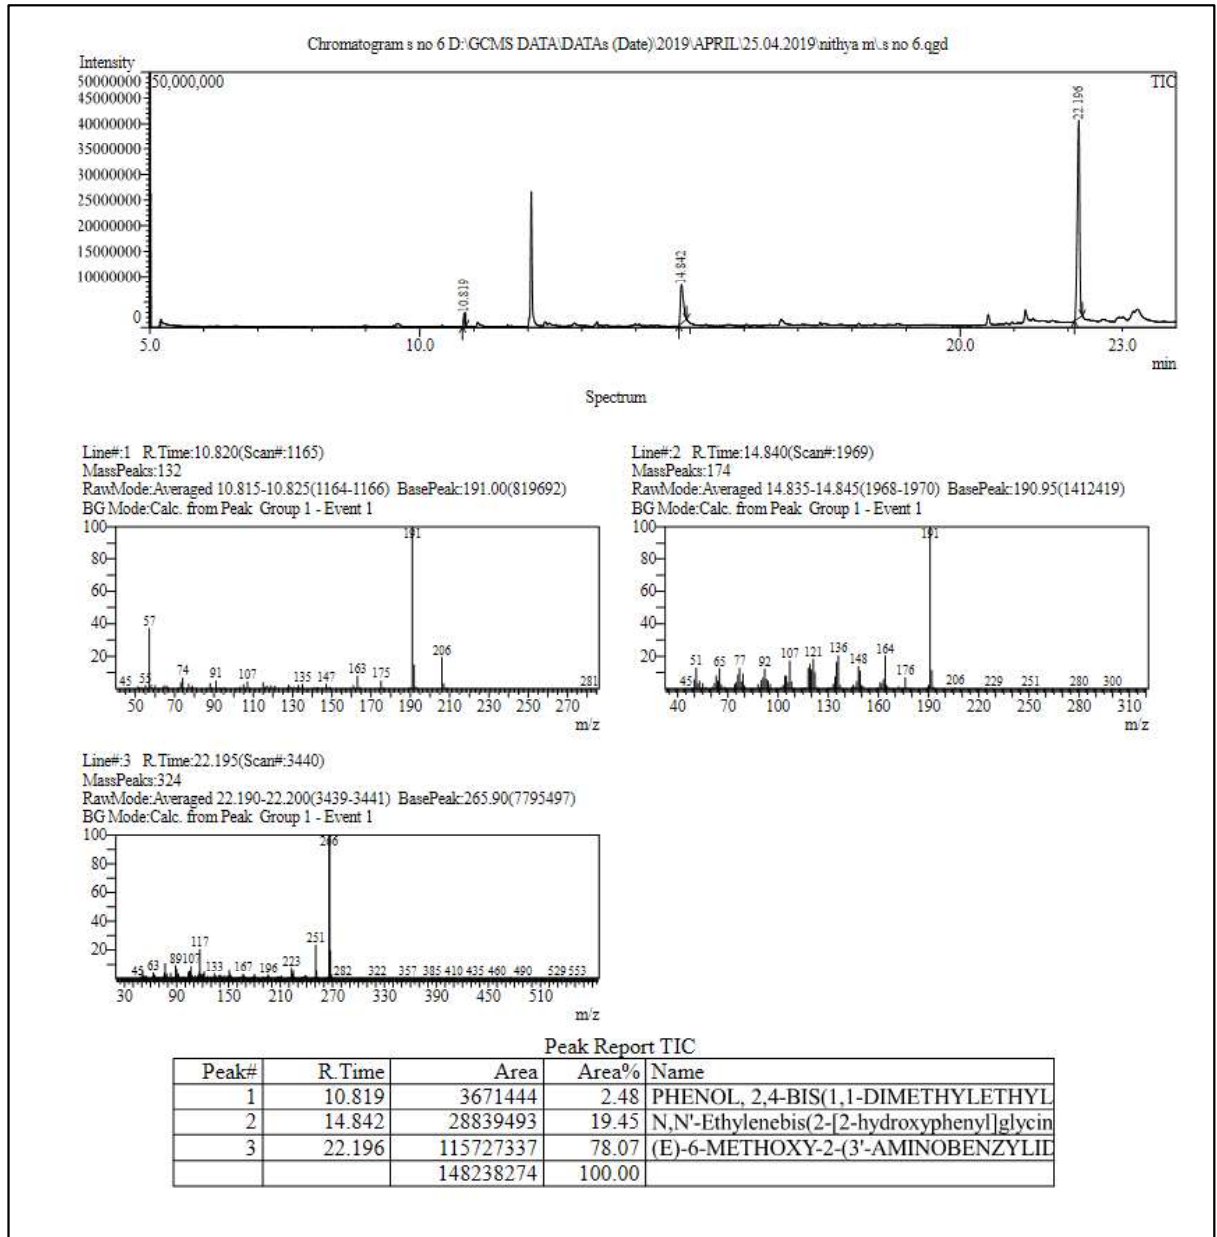

GC-MS chromatogram data for entry 2 in table 1

## Supporting information

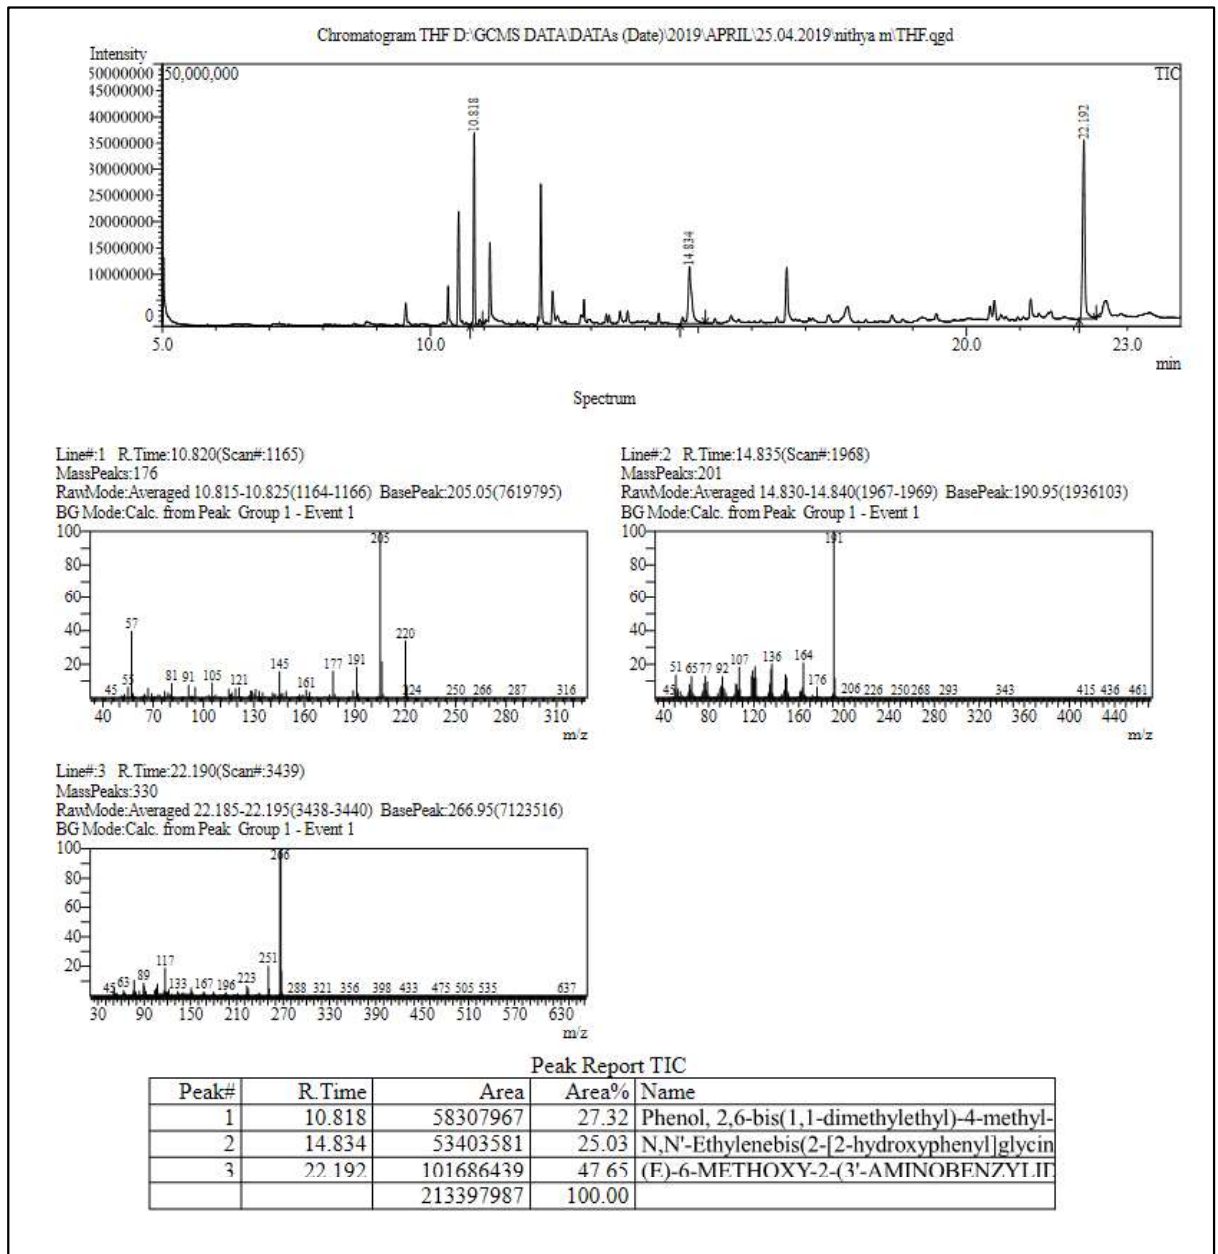

GC-MS chromatogram of entry 3 in table 1



## Supporting information

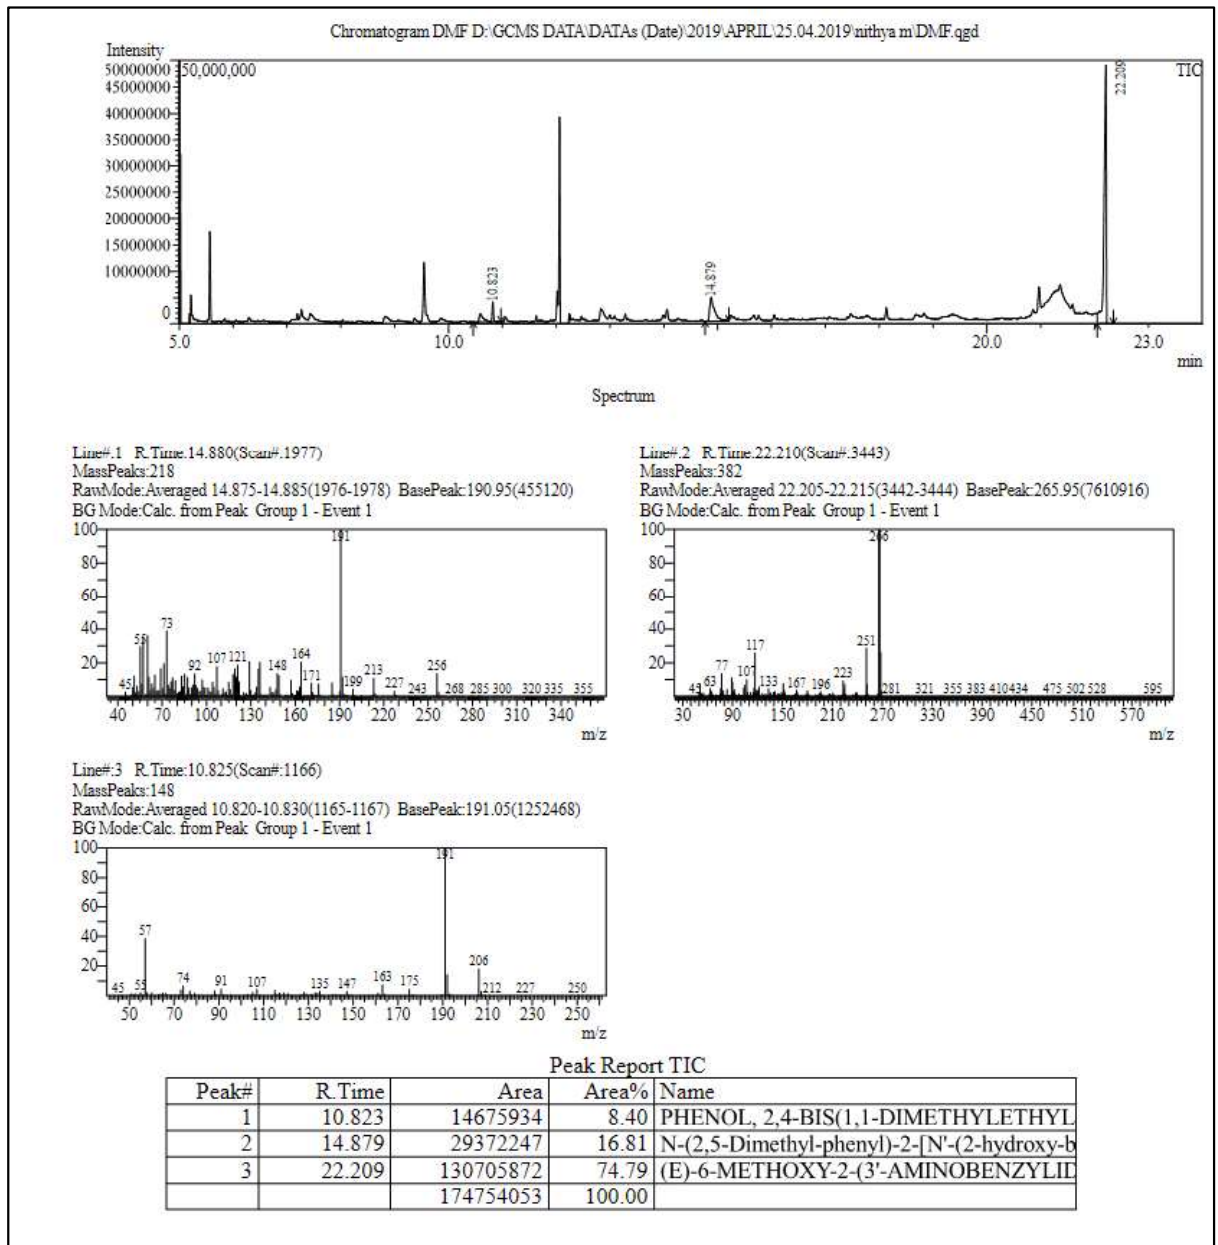

GC-MS chromatogram of entry 4 in table 1

## Supporting information

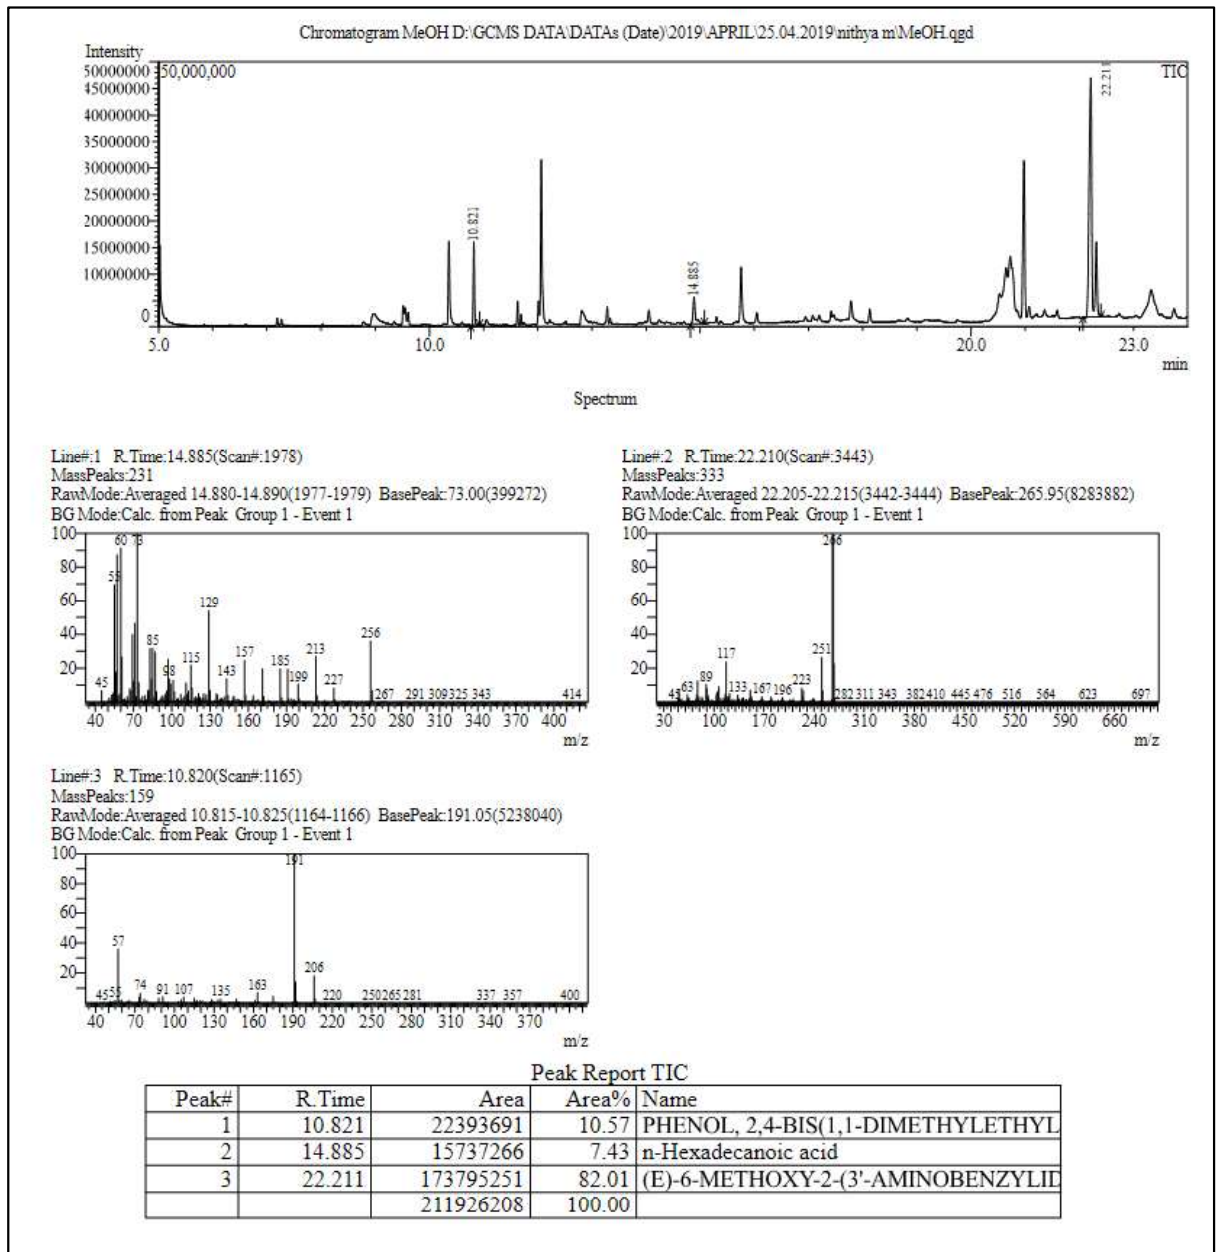

GC-MS chromatogram of entry 5 table 1

## Supporting information

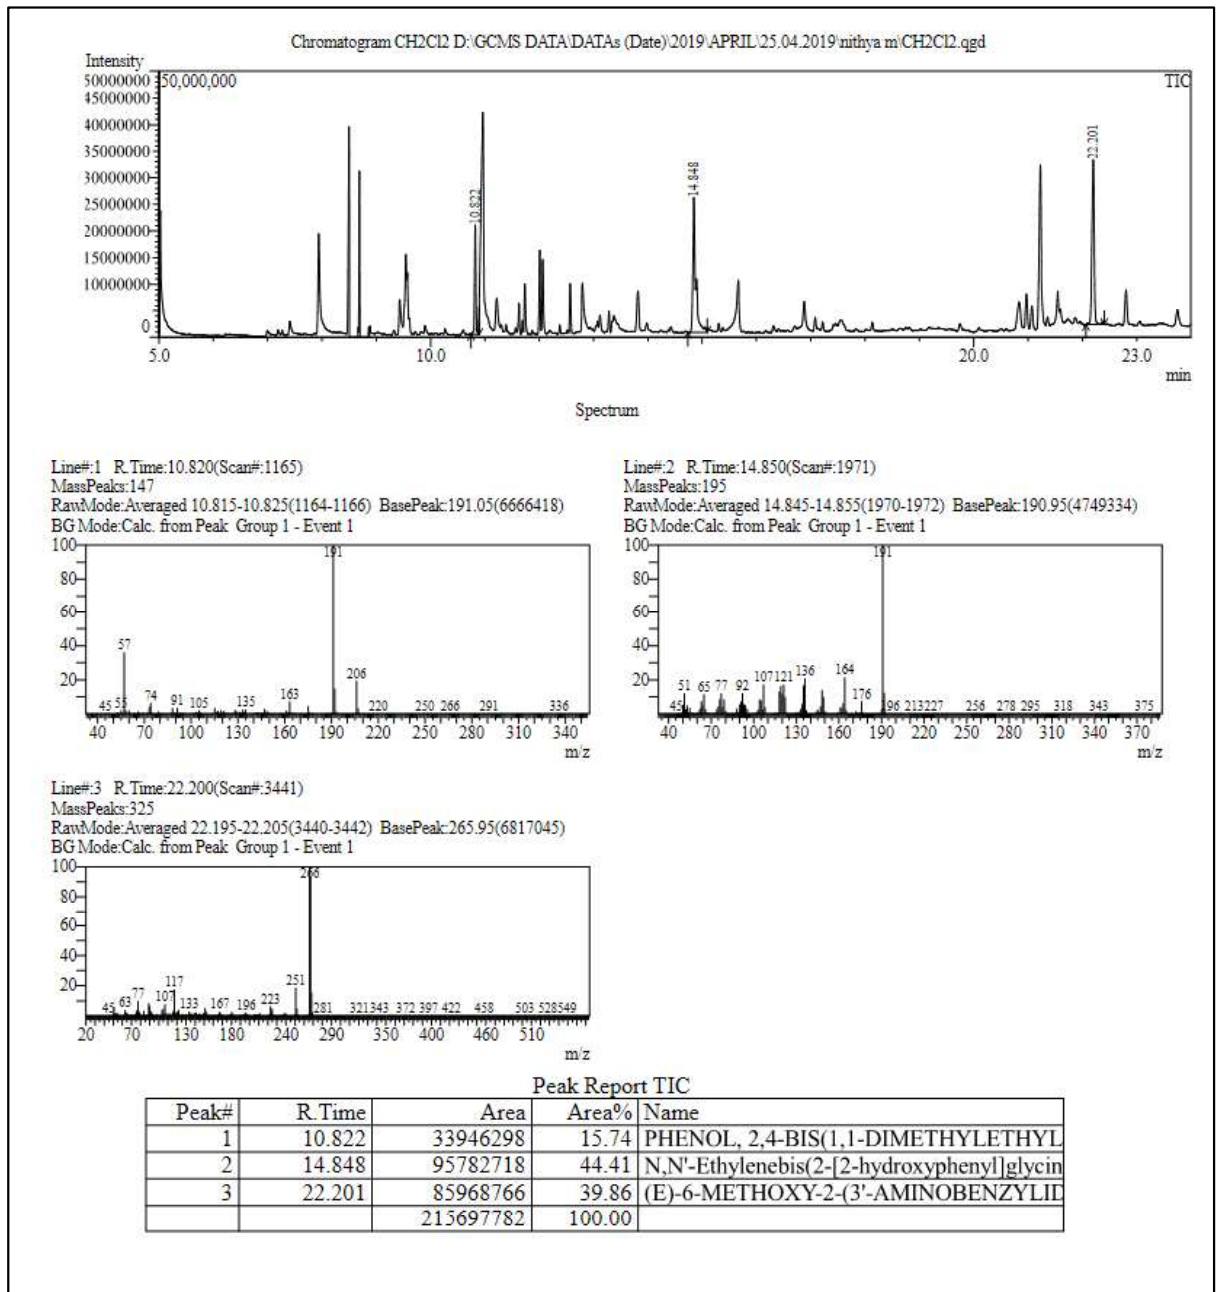

GC-MS chromatogram of entry 6 in table 1

# Supporting information

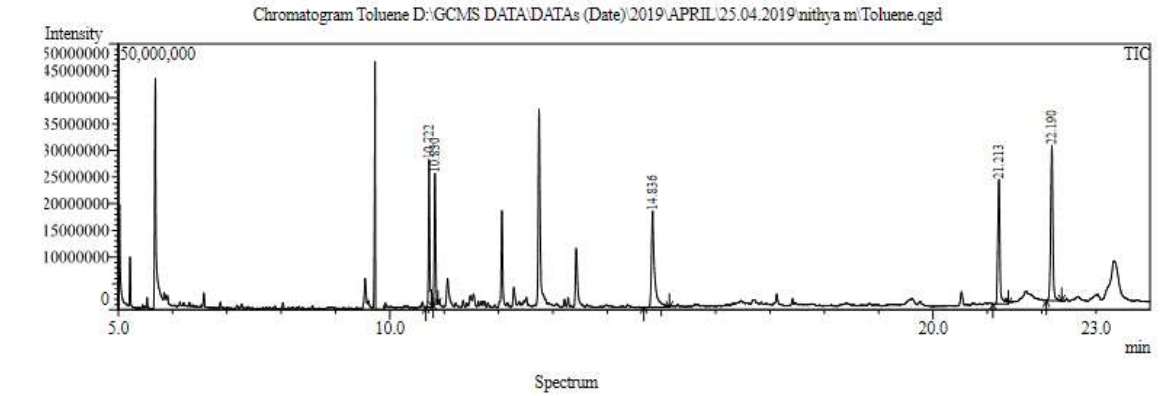

Line#:1 R.Time:10.720(Scan#:1145)  
MassPeaks:135  
RawMode:Averaged 10.715-10.725(1144-1146) BasePeak:168.05(6856554)  
BG Mode:Calc. from Peak Group 1 - Event 1

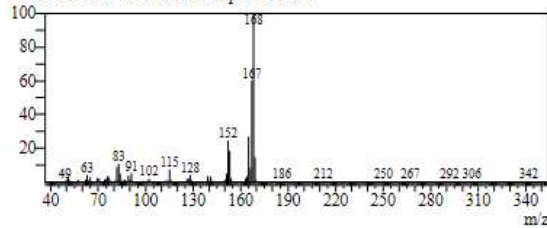

Line#:2 R.Time:10.830(Scan#:1167)  
MassPeaks:152  
RawMode:Averaged 10.825-10.835(1166-1168) BasePeak:168.05(5939495)  
BG Mode:Calc. from Peak Group 1 - Event 1

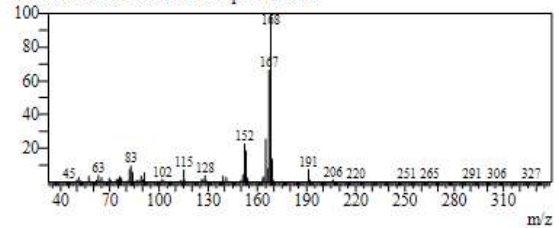

Line#:3 R.Time:14.835(Scan#:1968)  
MassPeaks:219  
RawMode:Averaged 14.830-14.840(1967-1969) BasePeak:190.95(3535176)  
BG Mode:Calc. from Peak Group 1 - Event 1

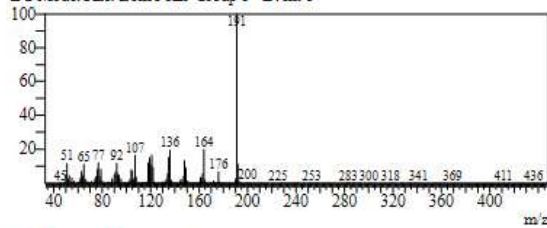

Line#:4 R.Time:21.215(Scan#:3244)  
MassPeaks:355  
RawMode:Averaged 21.210-21.220(3243-3245) BasePeak:267.95(5081668)  
BG Mode:Calc. from Peak Group 1 - Event 1

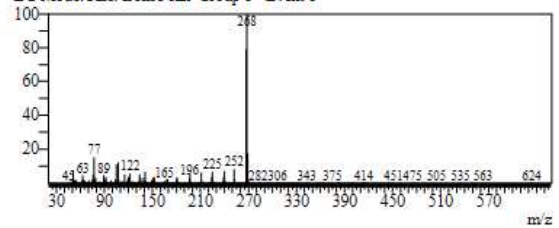

Line#:5 R.Time:22.190(Scan#:3439)  
MassPeaks:323  
RawMode:Averaged 22.185-22.195(3438-3440) BasePeak:265.95(6114649)  
BG Mode:Calc. from Peak Group 1 - Event 1

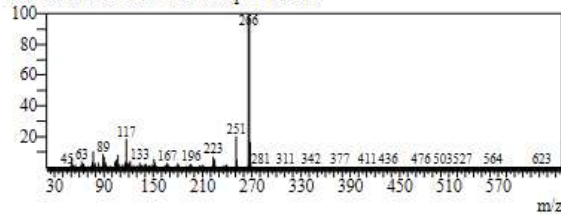

Peak Report TIC

| Peak# | R.Time | Area     | Area% | Name                                       |
|-------|--------|----------|-------|--------------------------------------------|
| 1     | 10.722 | 48863415 | 16.03 | 1,1'-Biphenyl, 4-methyl-                   |
| 2     | 10.830 | 40007743 | 13.13 | 1,1'-Biphenyl, 4-methyl-                   |
| 3     | 14.836 | 72523074 | 23.79 | N,N'-Ethylencbis(2-[2-hydroxyphenyl]glycin |
| 4     | 21.213 | 62767858 | 20.59 | 4H-1-Benzopyran-4-one, 3-hydroxy-7-metho   |
| 5     | 22.190 | 80638448 | 26.46 | (E)-6-METHOXY-2-(3'-AMINO BENZYL)IE        |

GC-

GC-MS chromatogram of entry 7 table 1

## Supporting information

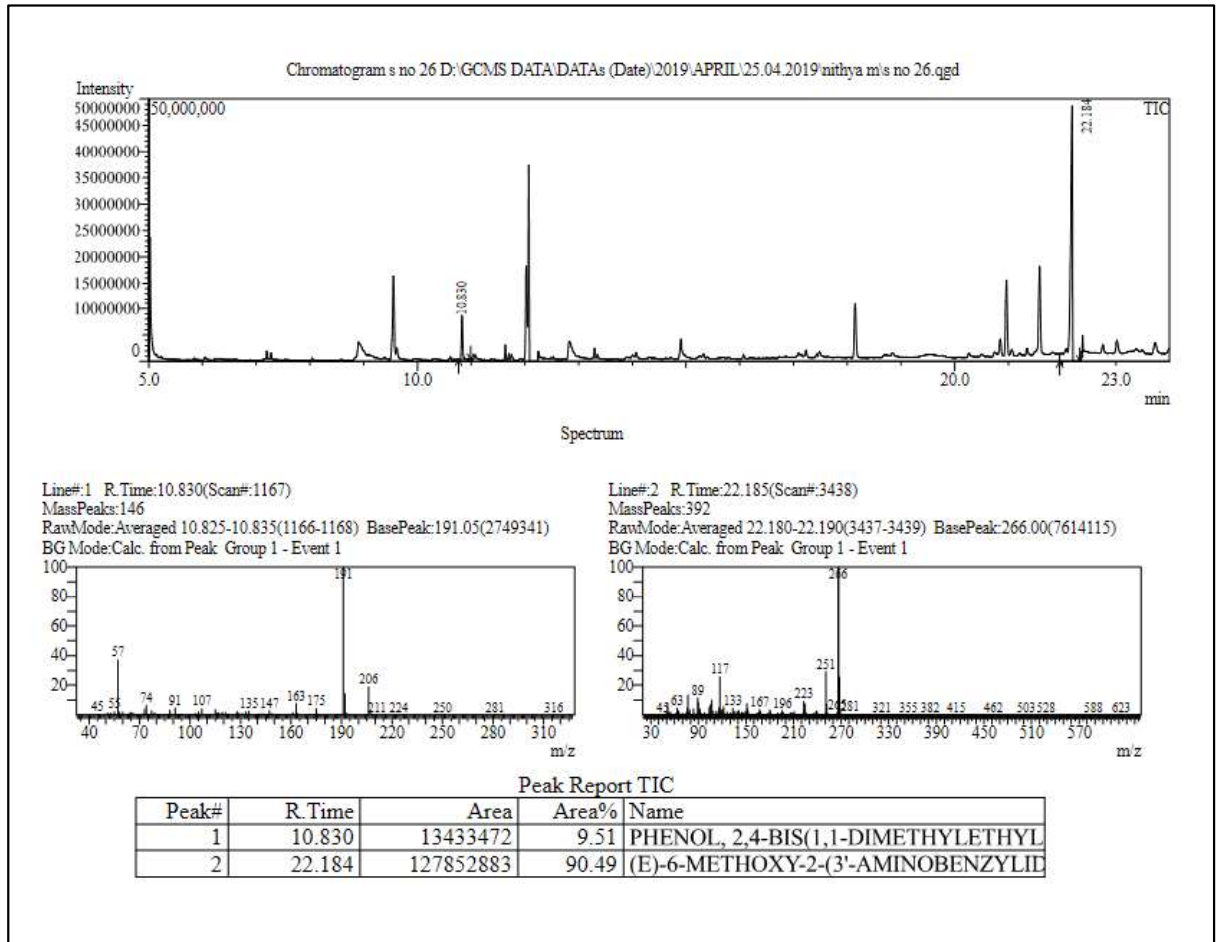

GC-MS chromatogram of entry 8 in table 1



## Supporting information

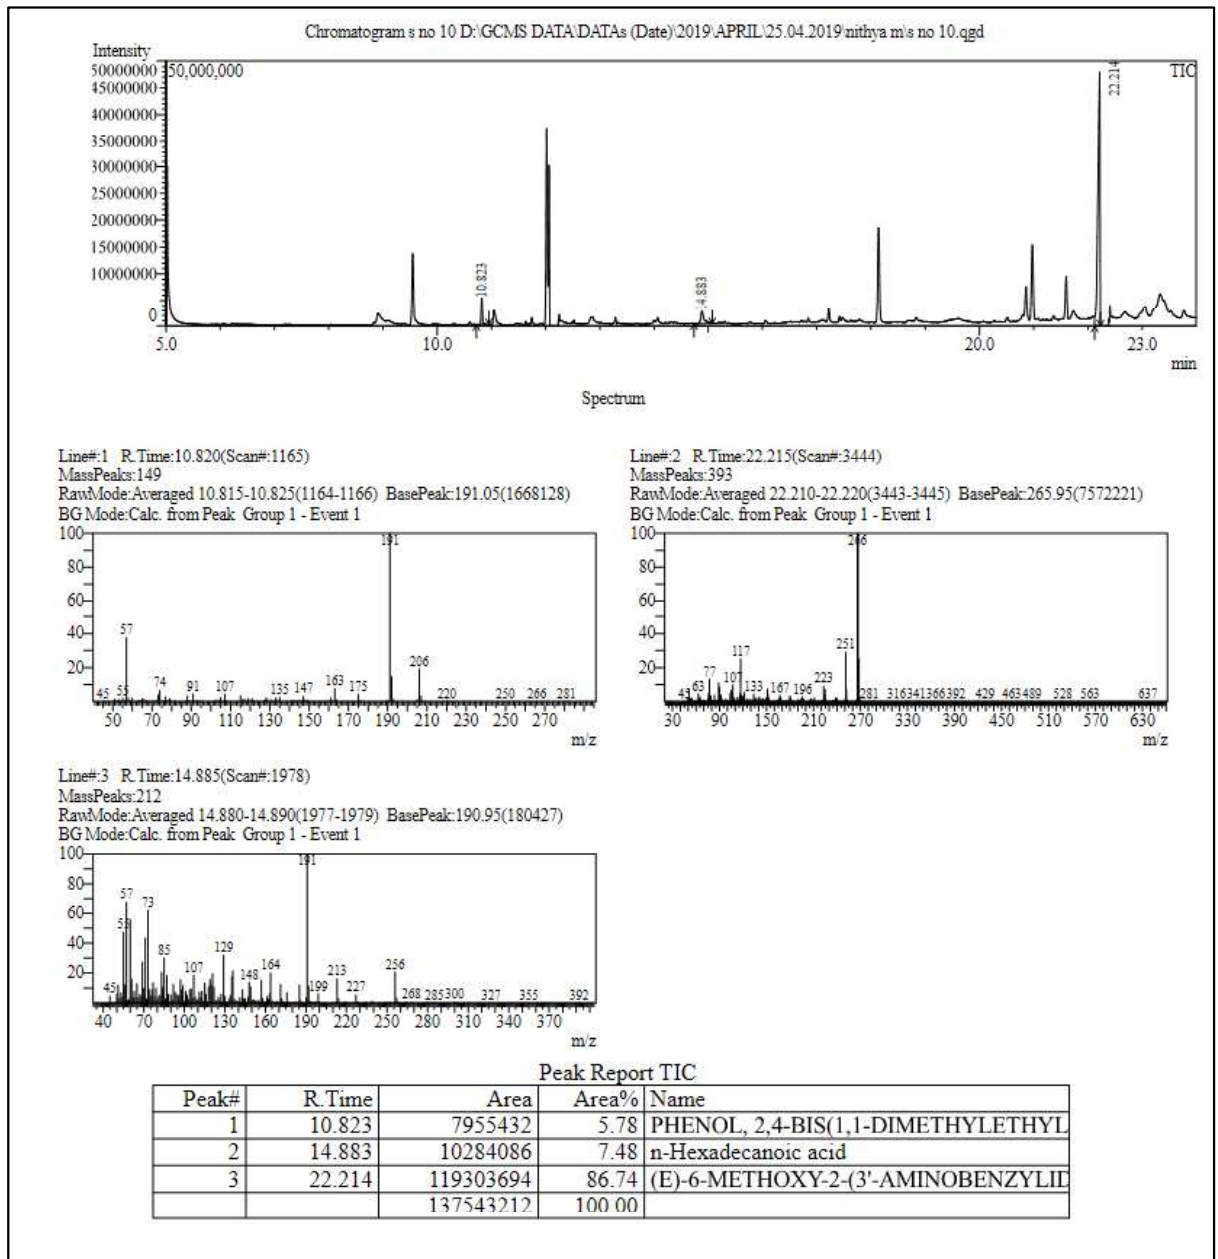

GC-MS chromatogram of entry 9 in table 1



## Supporting information

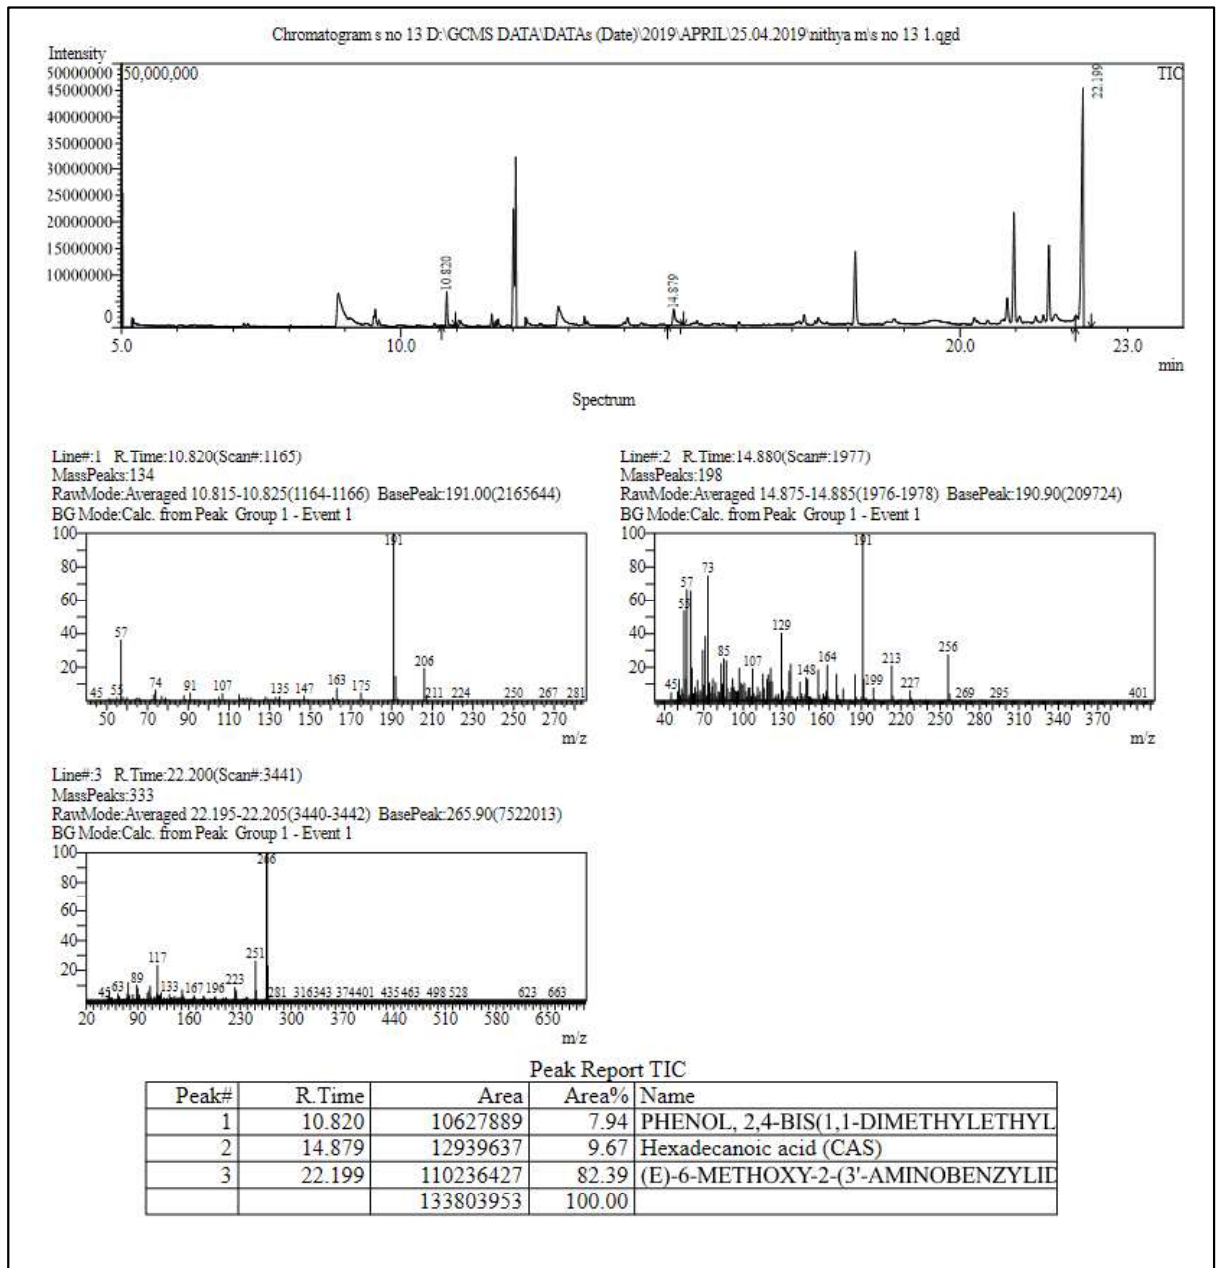

GC-MS chromatogram of entry 10 in table 1

## Supporting information

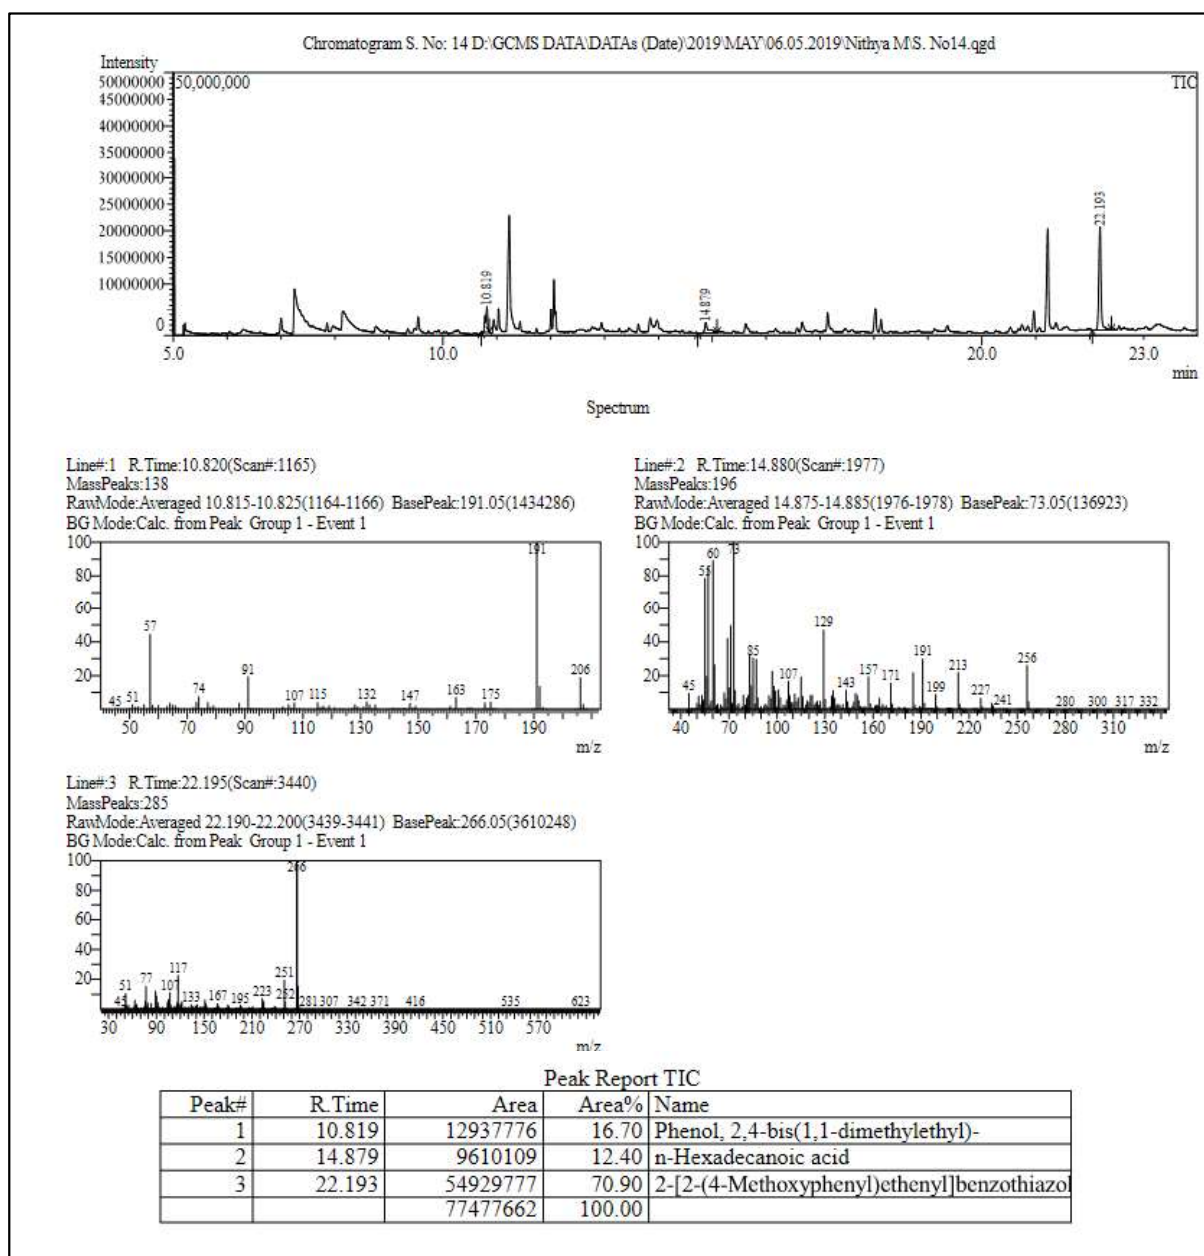

GC-MS chromatogram of entry 11 in table 1

## Supporting information

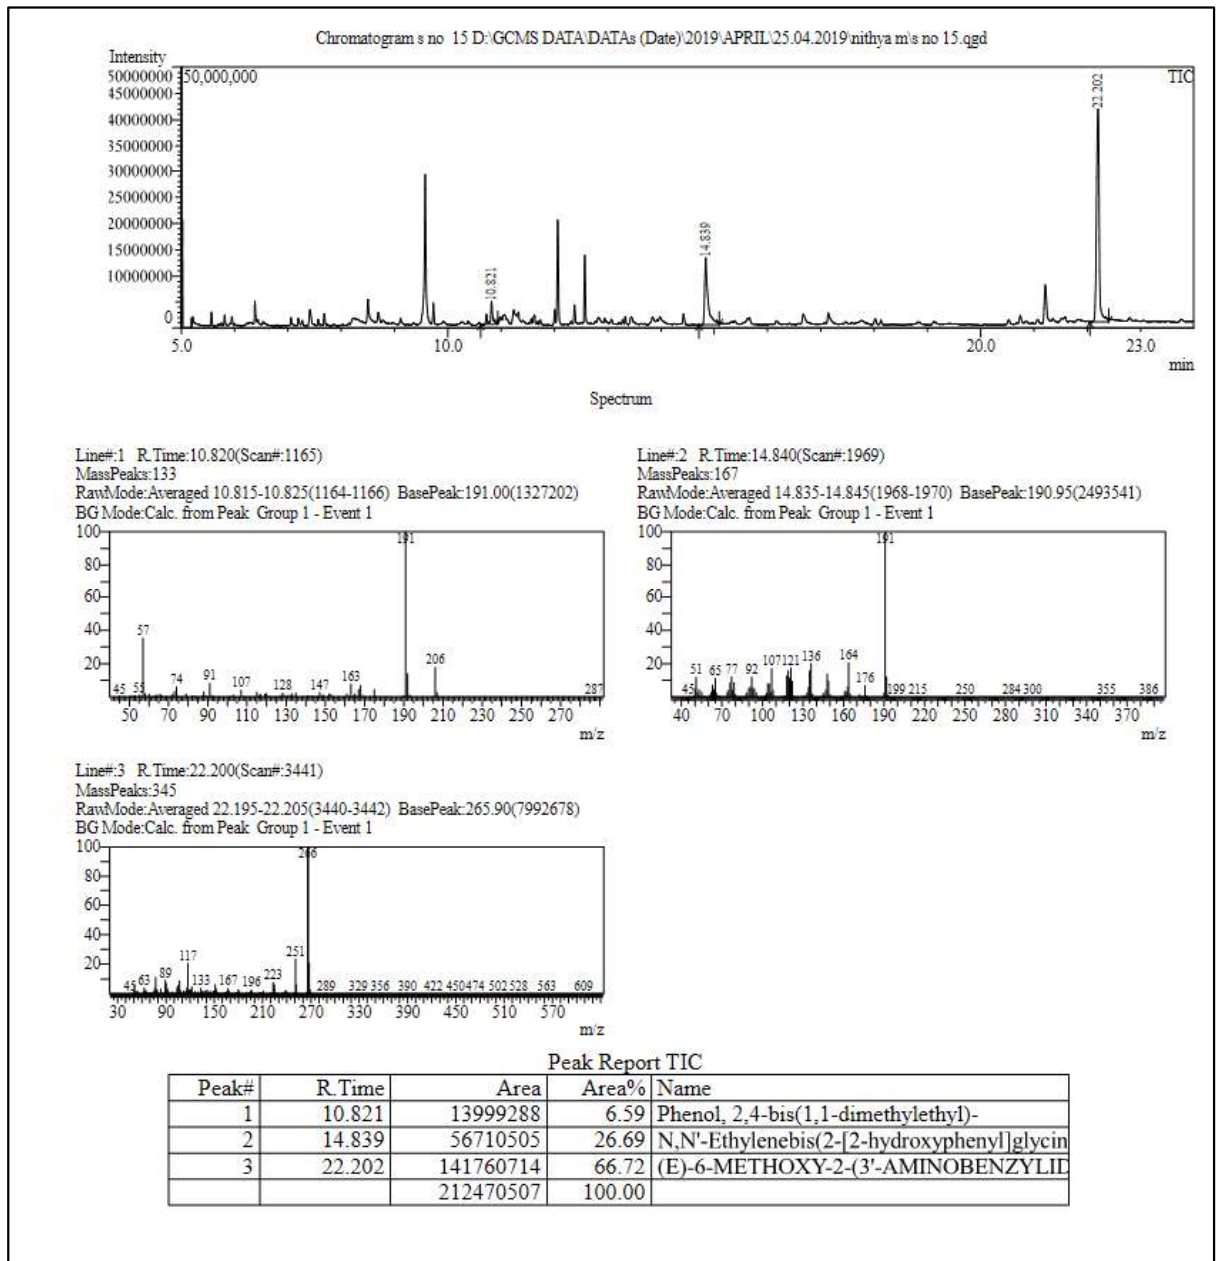

GC-MS chromatogram of entry 12 in table 1

## Supporting information

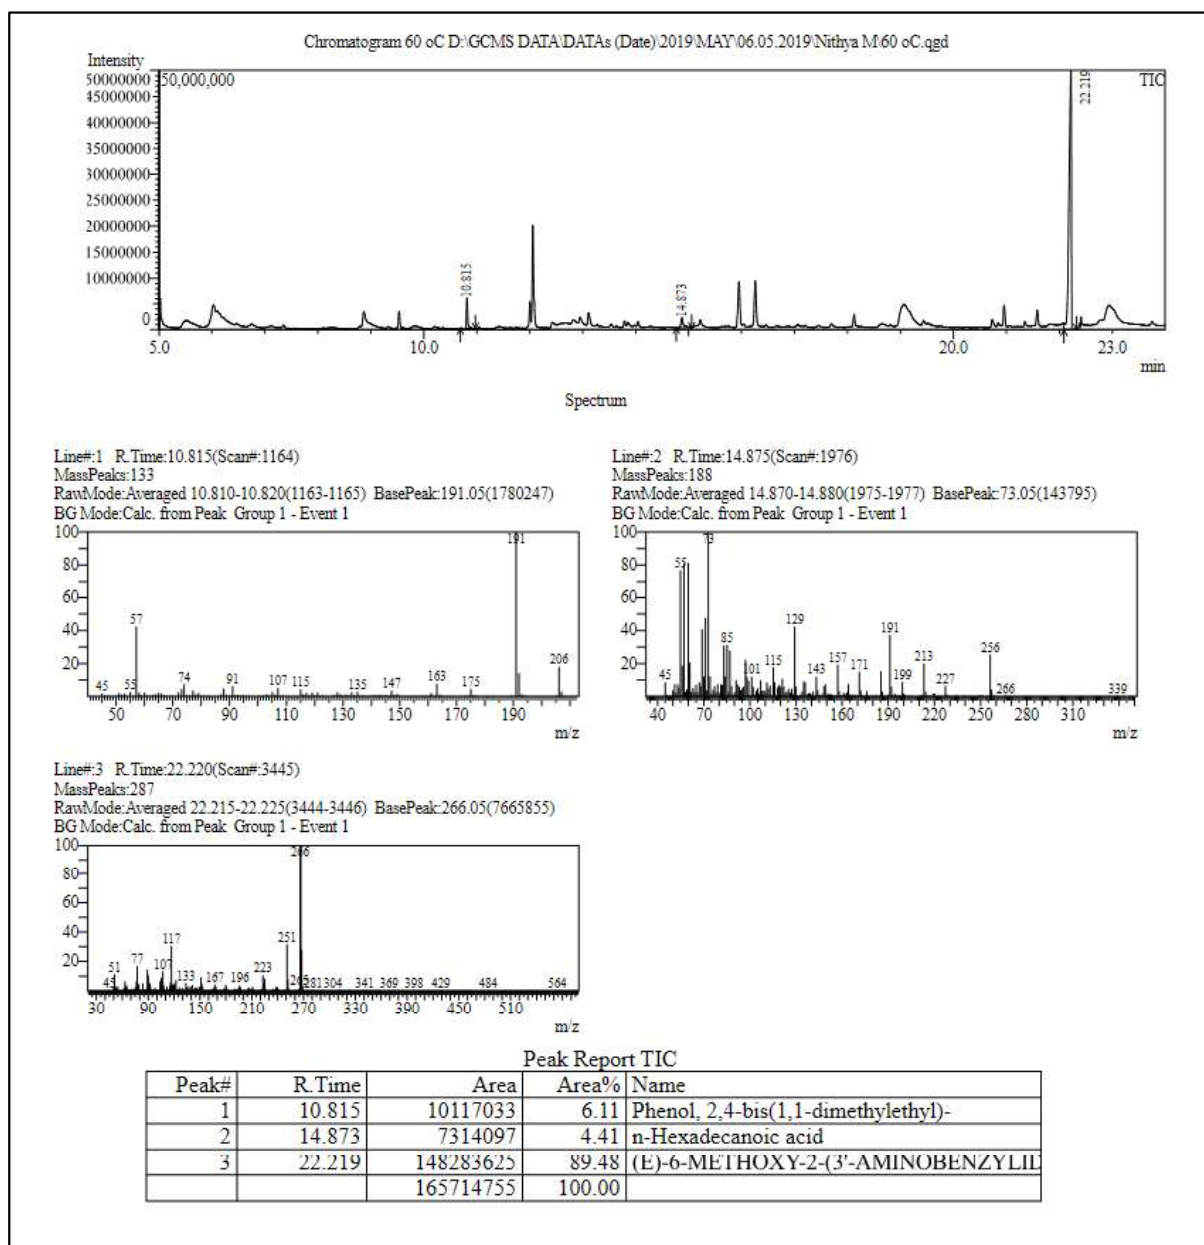

GC-MS chromatogram of entry 13 in table 1

## Supporting information

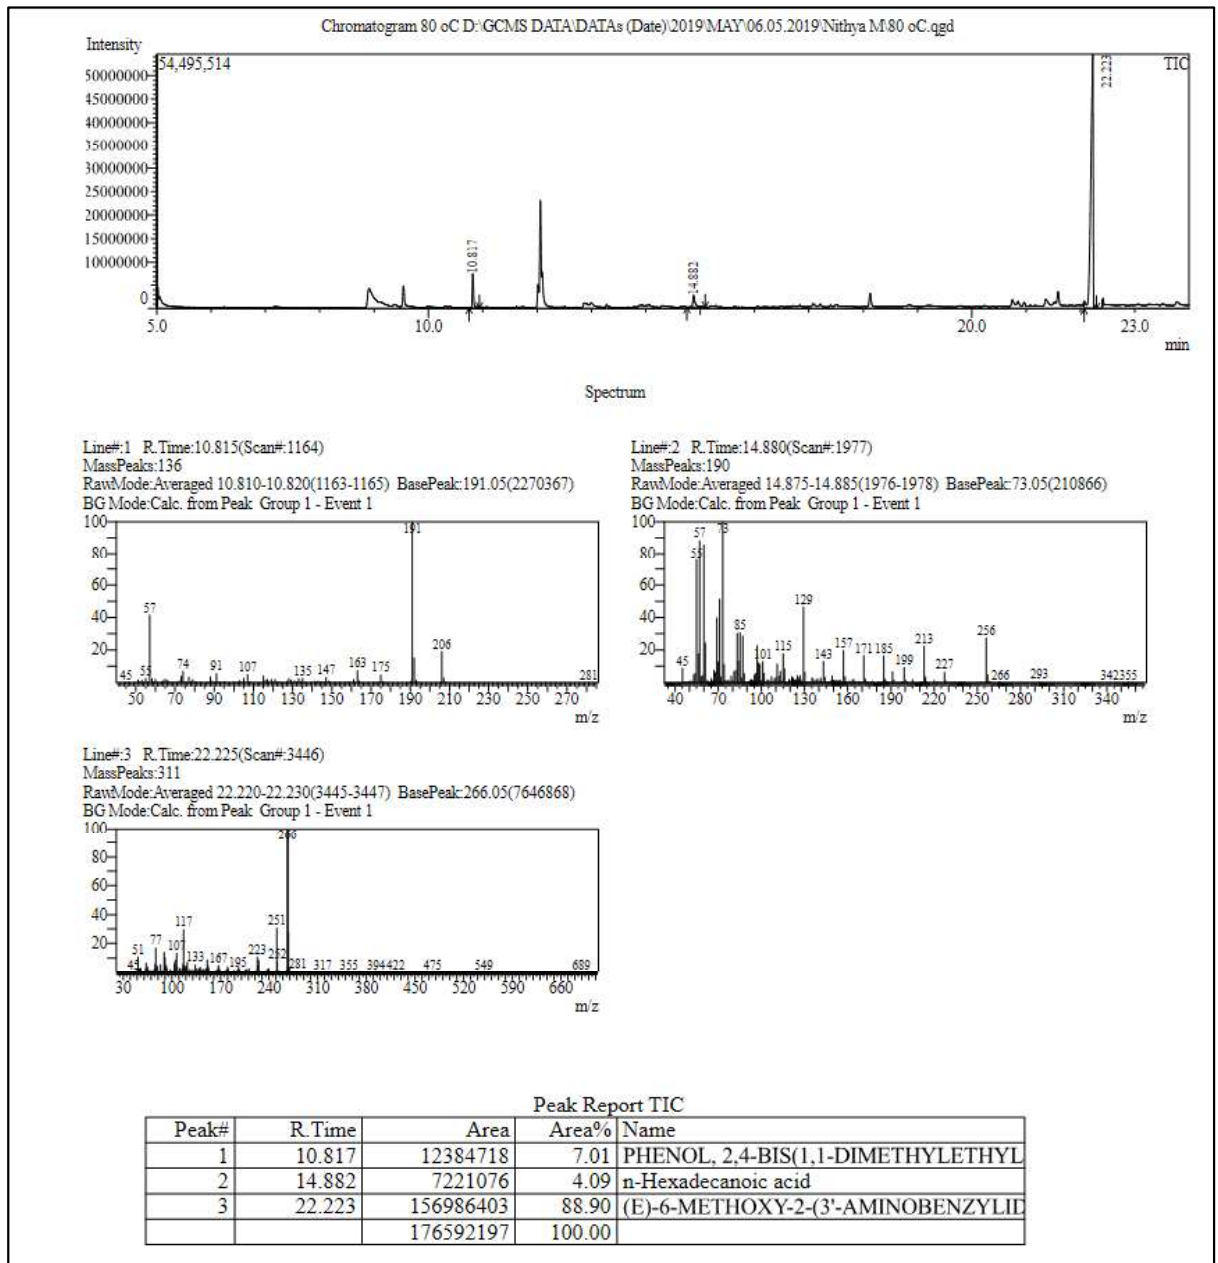

GC-MS chromatogram of entry 14 in table 1

## Supporting information

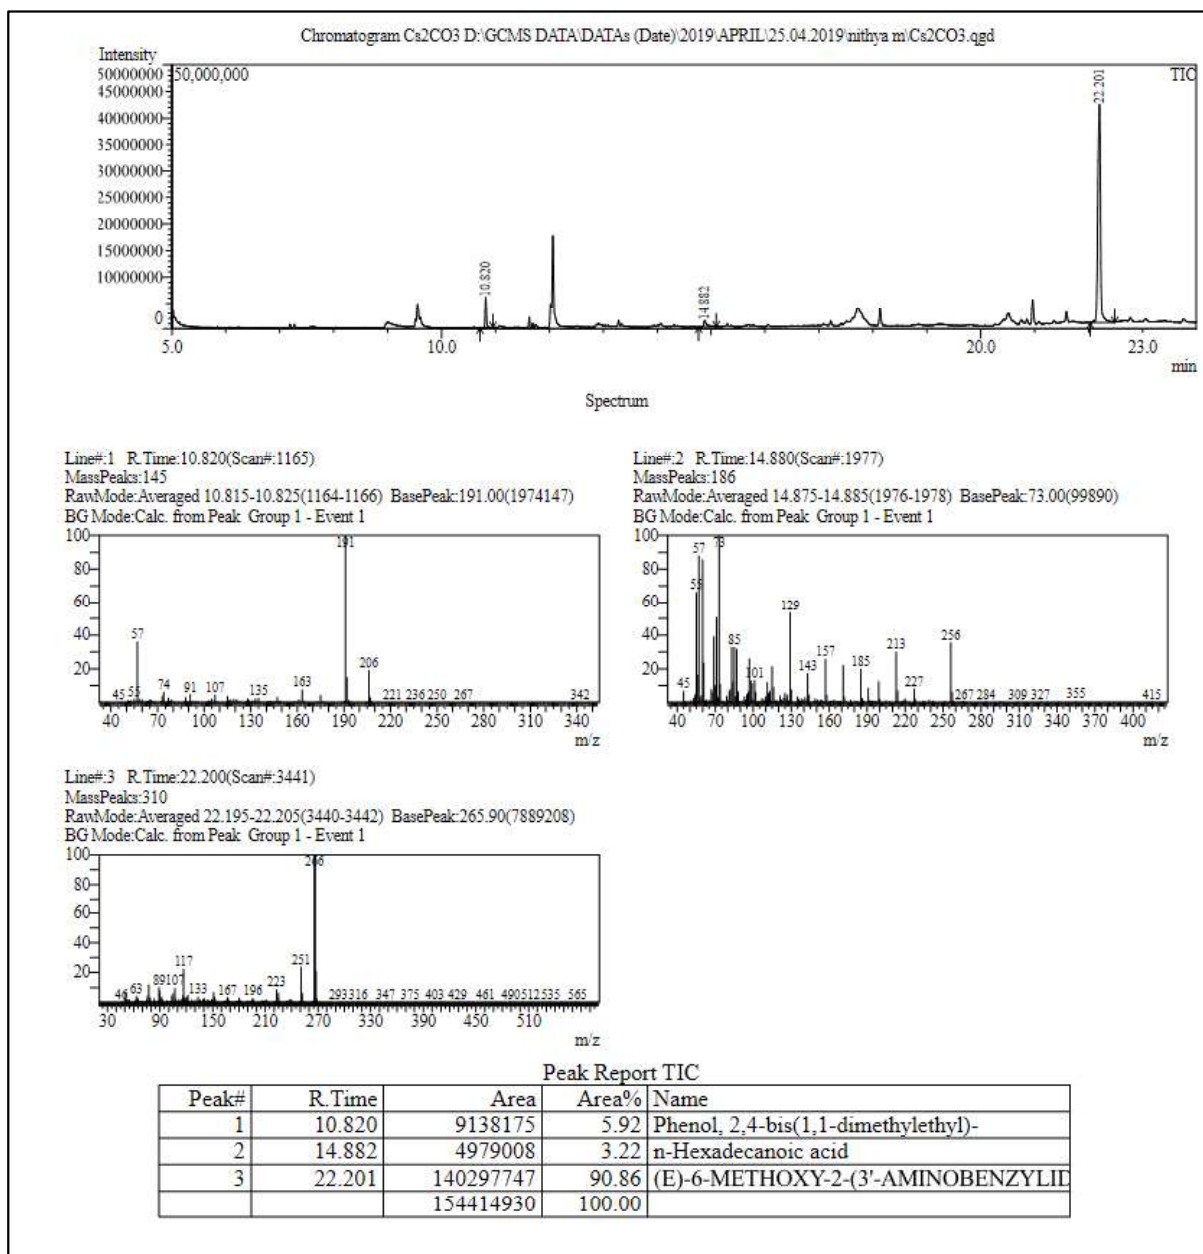

GC-MS chromatogram of entry 15 in table 1



## Supporting information

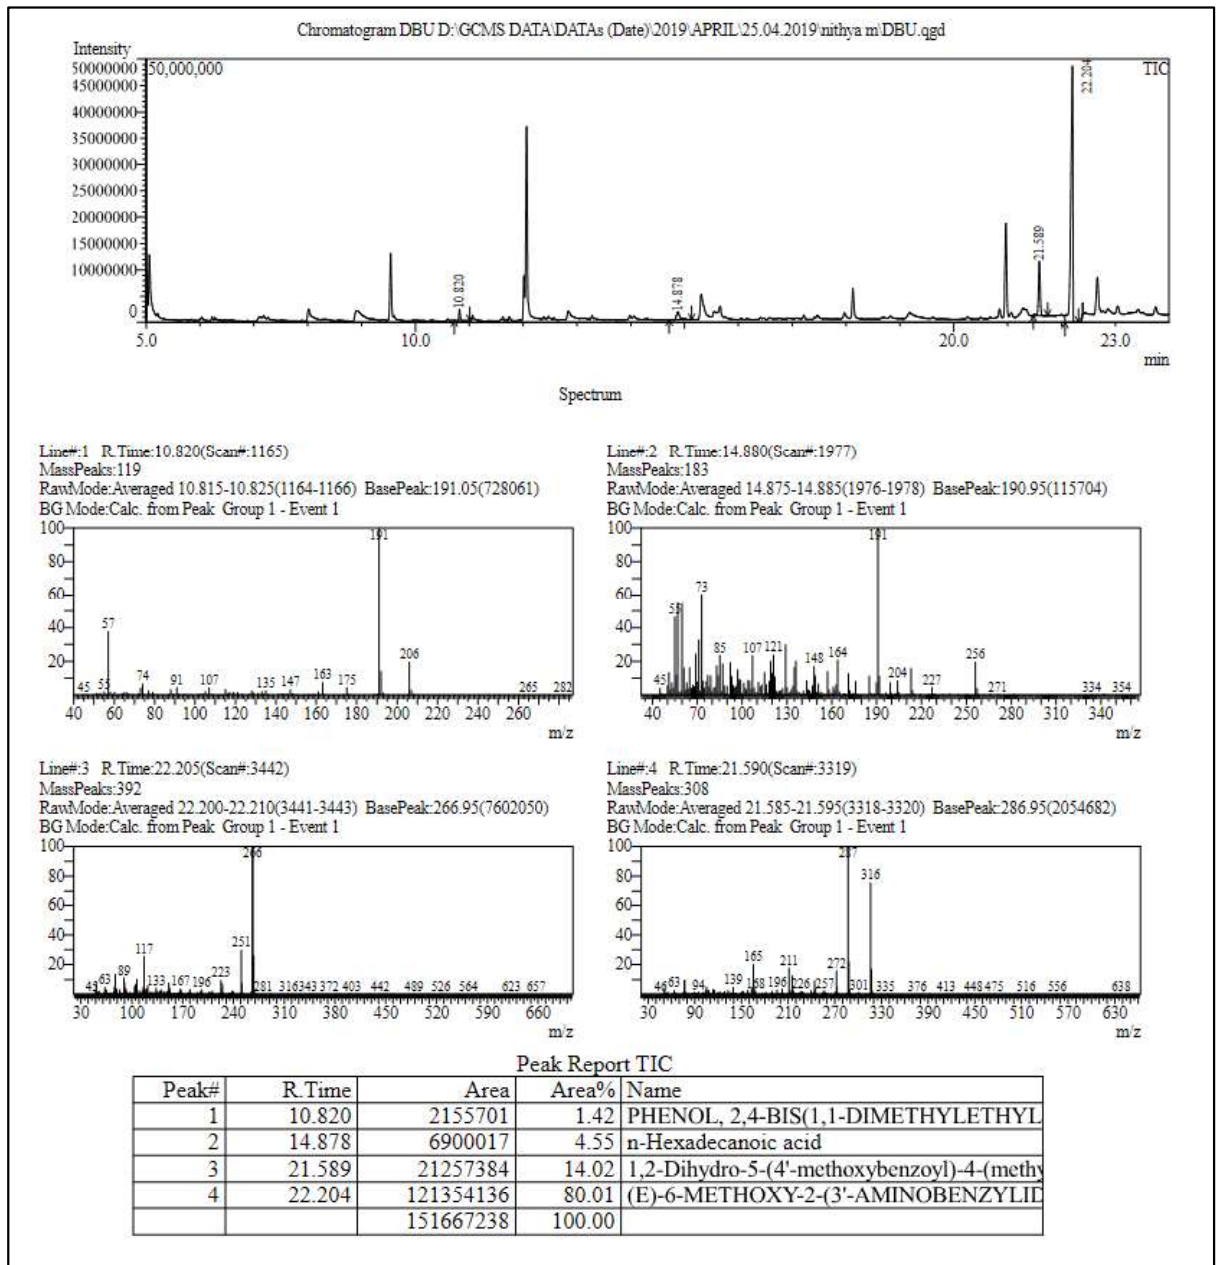

GC-MS chromatogram of entry 16 in table 1

## Supporting information

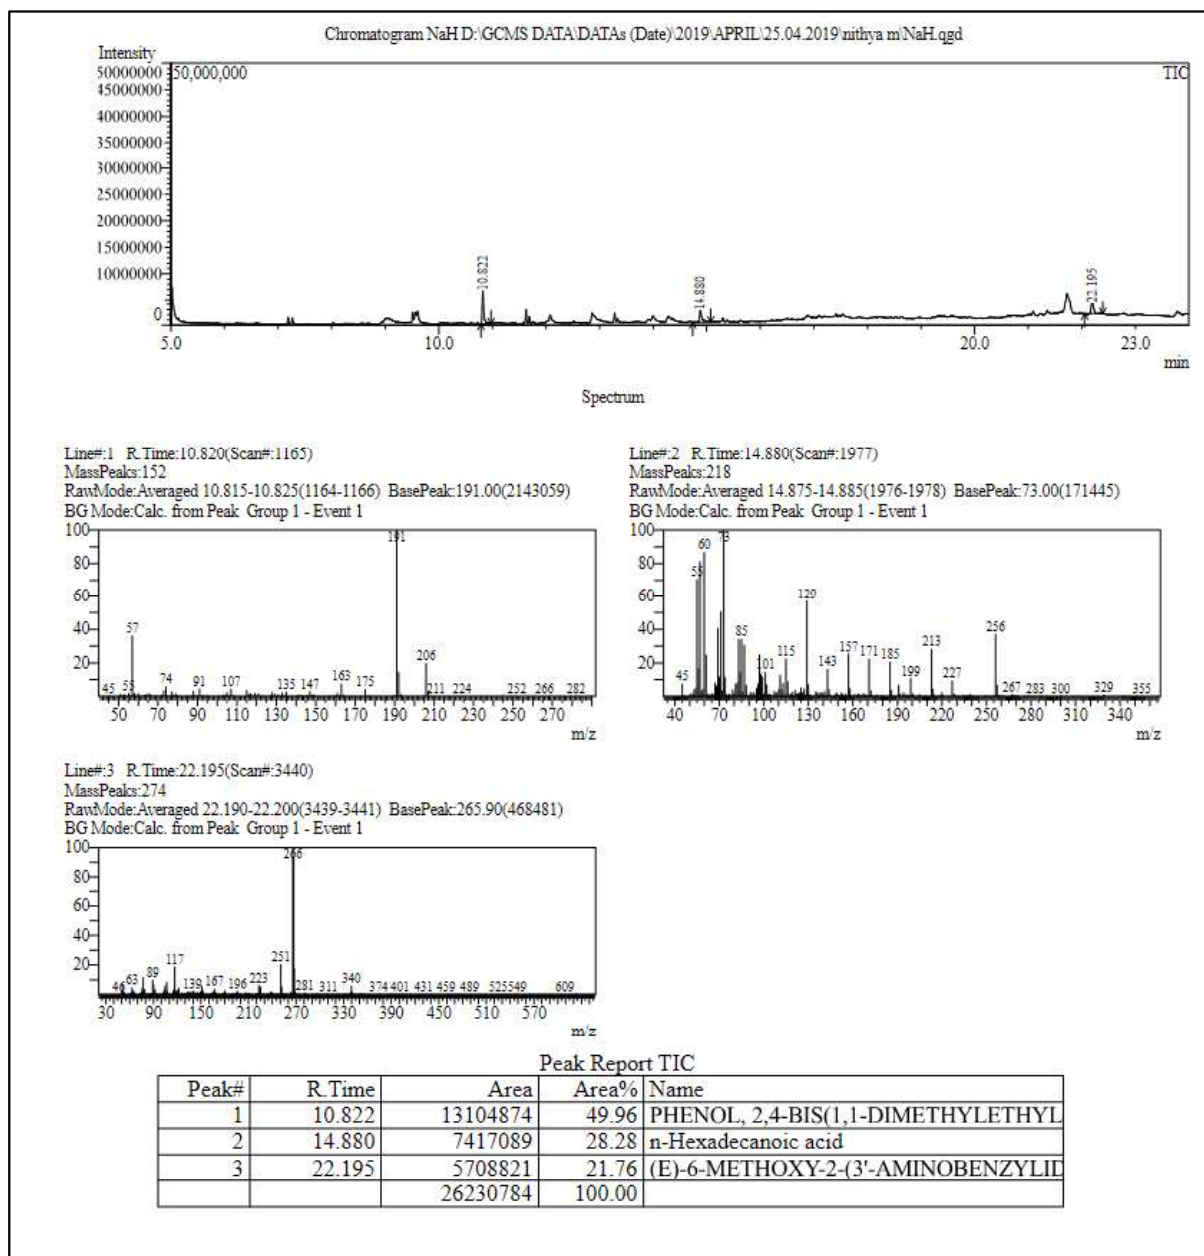

GC-MS chromatogram of entry 17 in table 1

## Supporting information

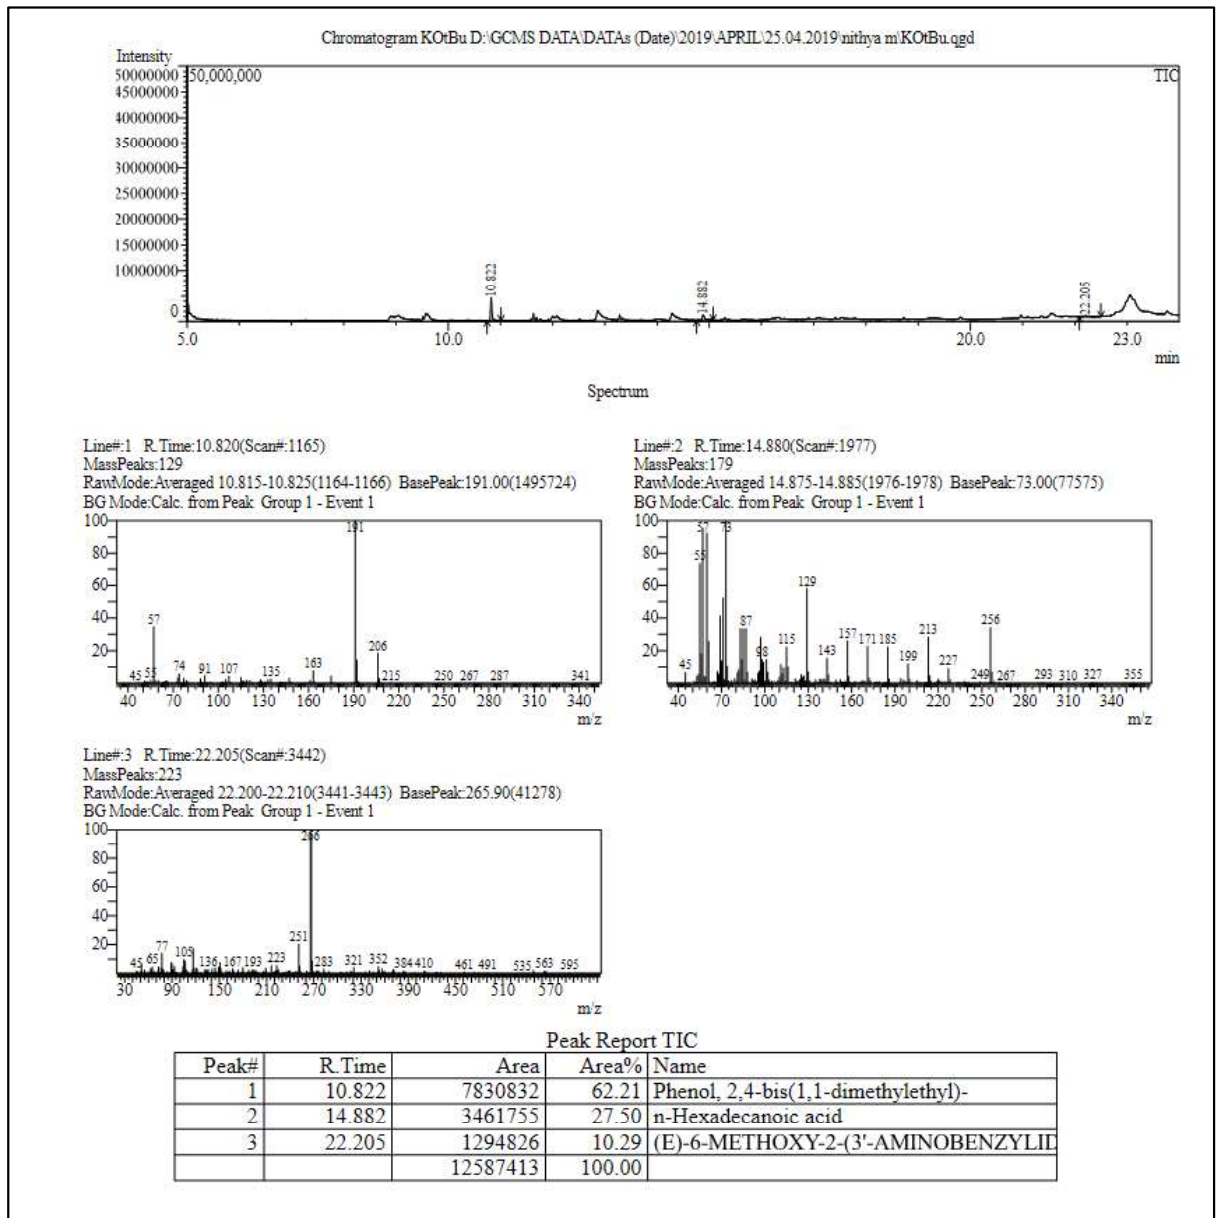

GC-MS chromatogram of entry 18 in table 1

## Supporting information

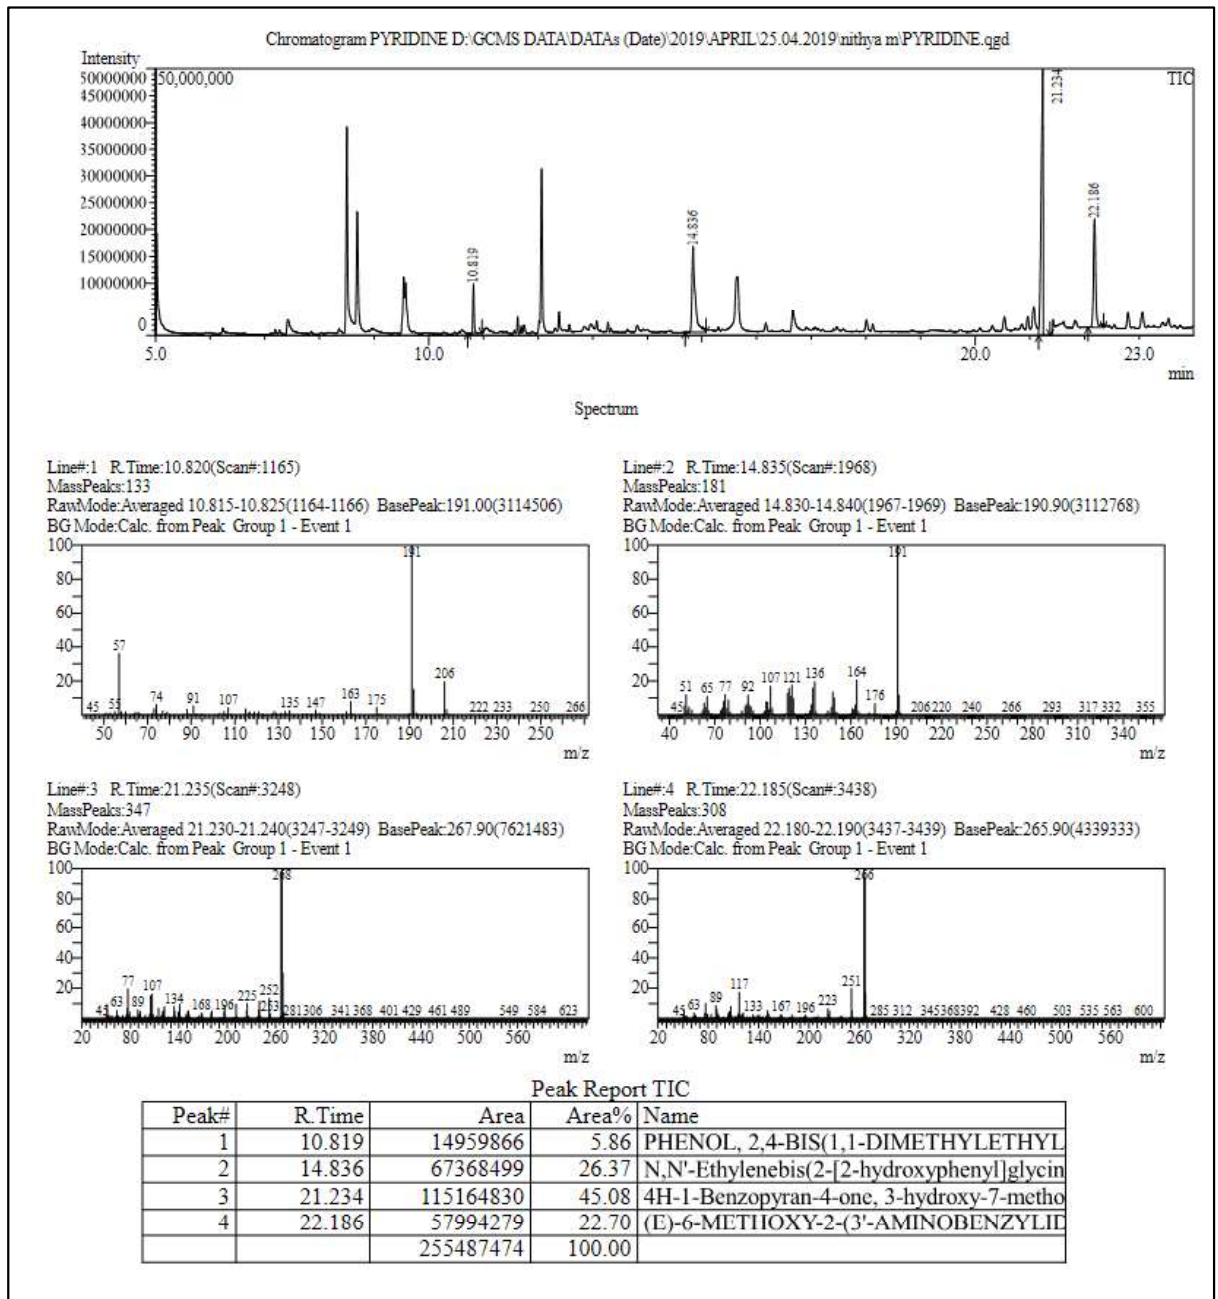

GC-MS chromatogram of entry 19 in table 1

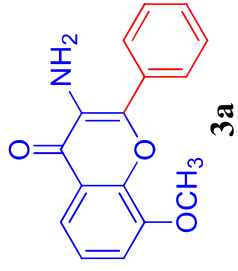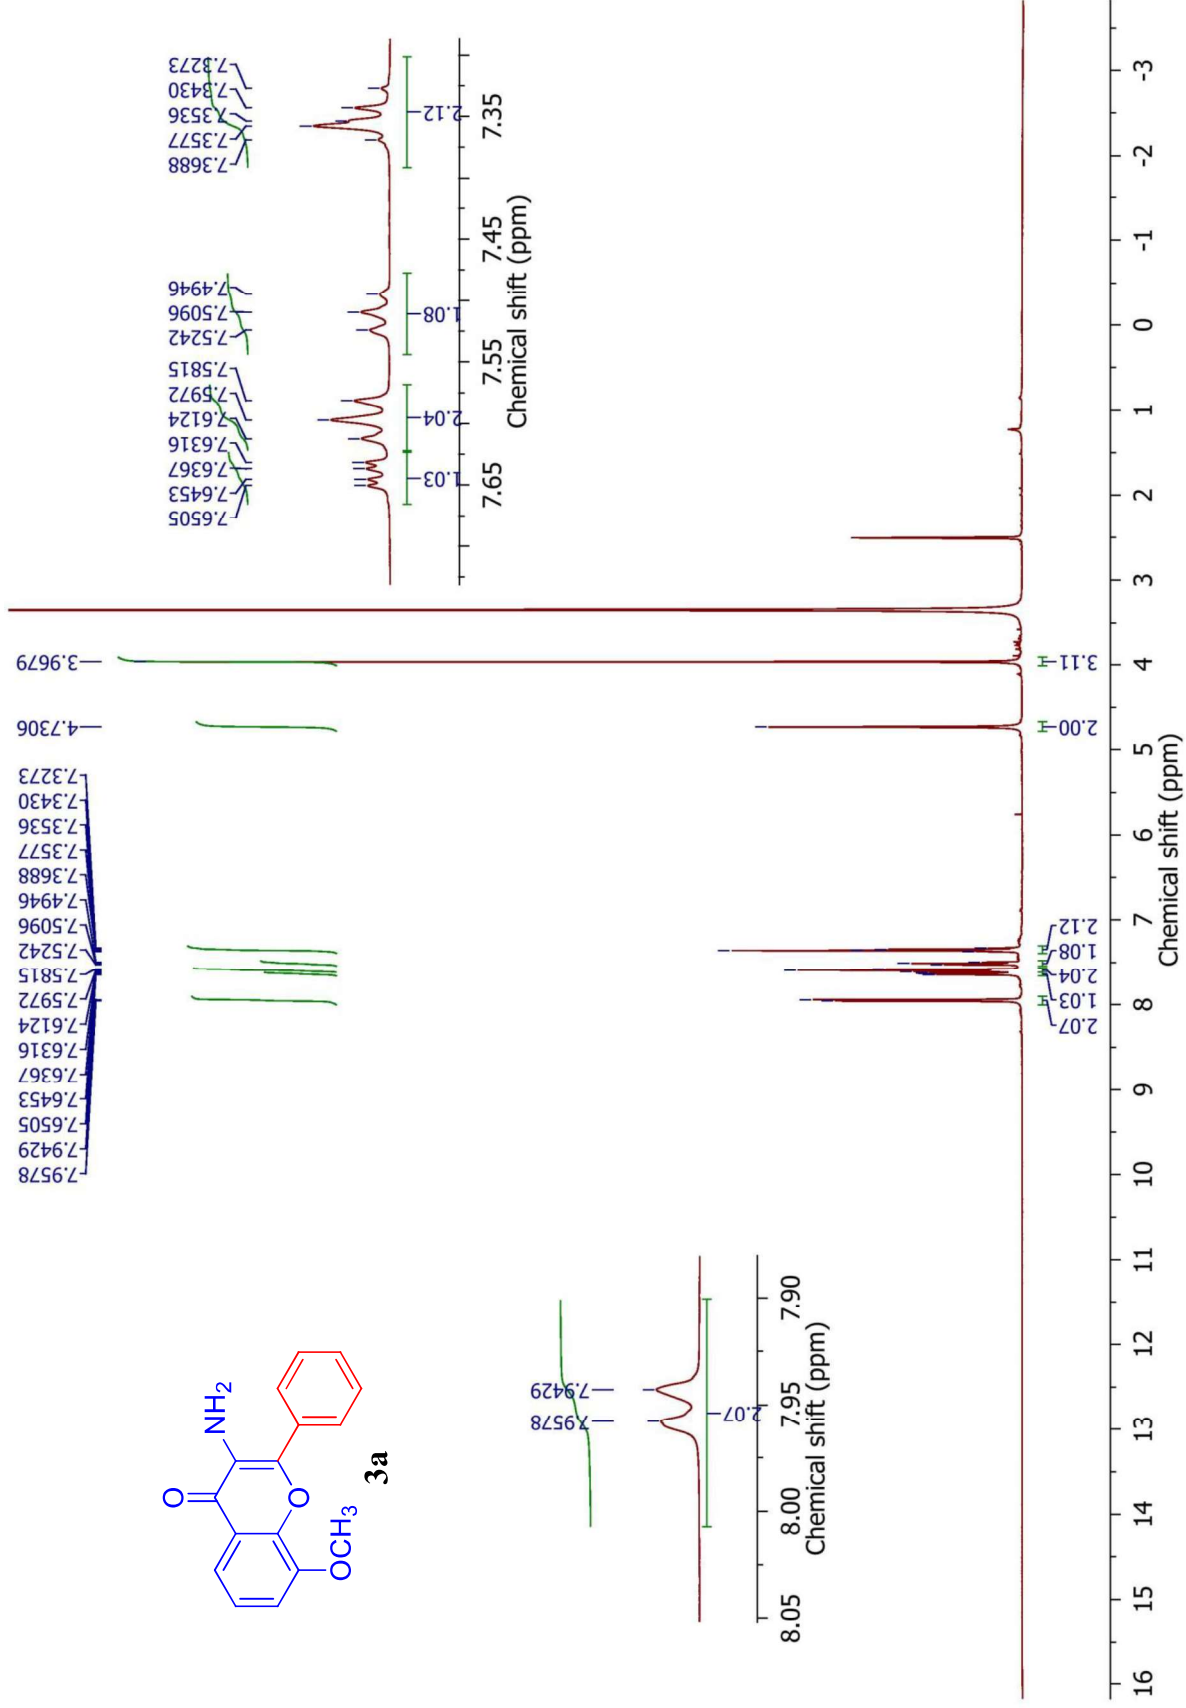

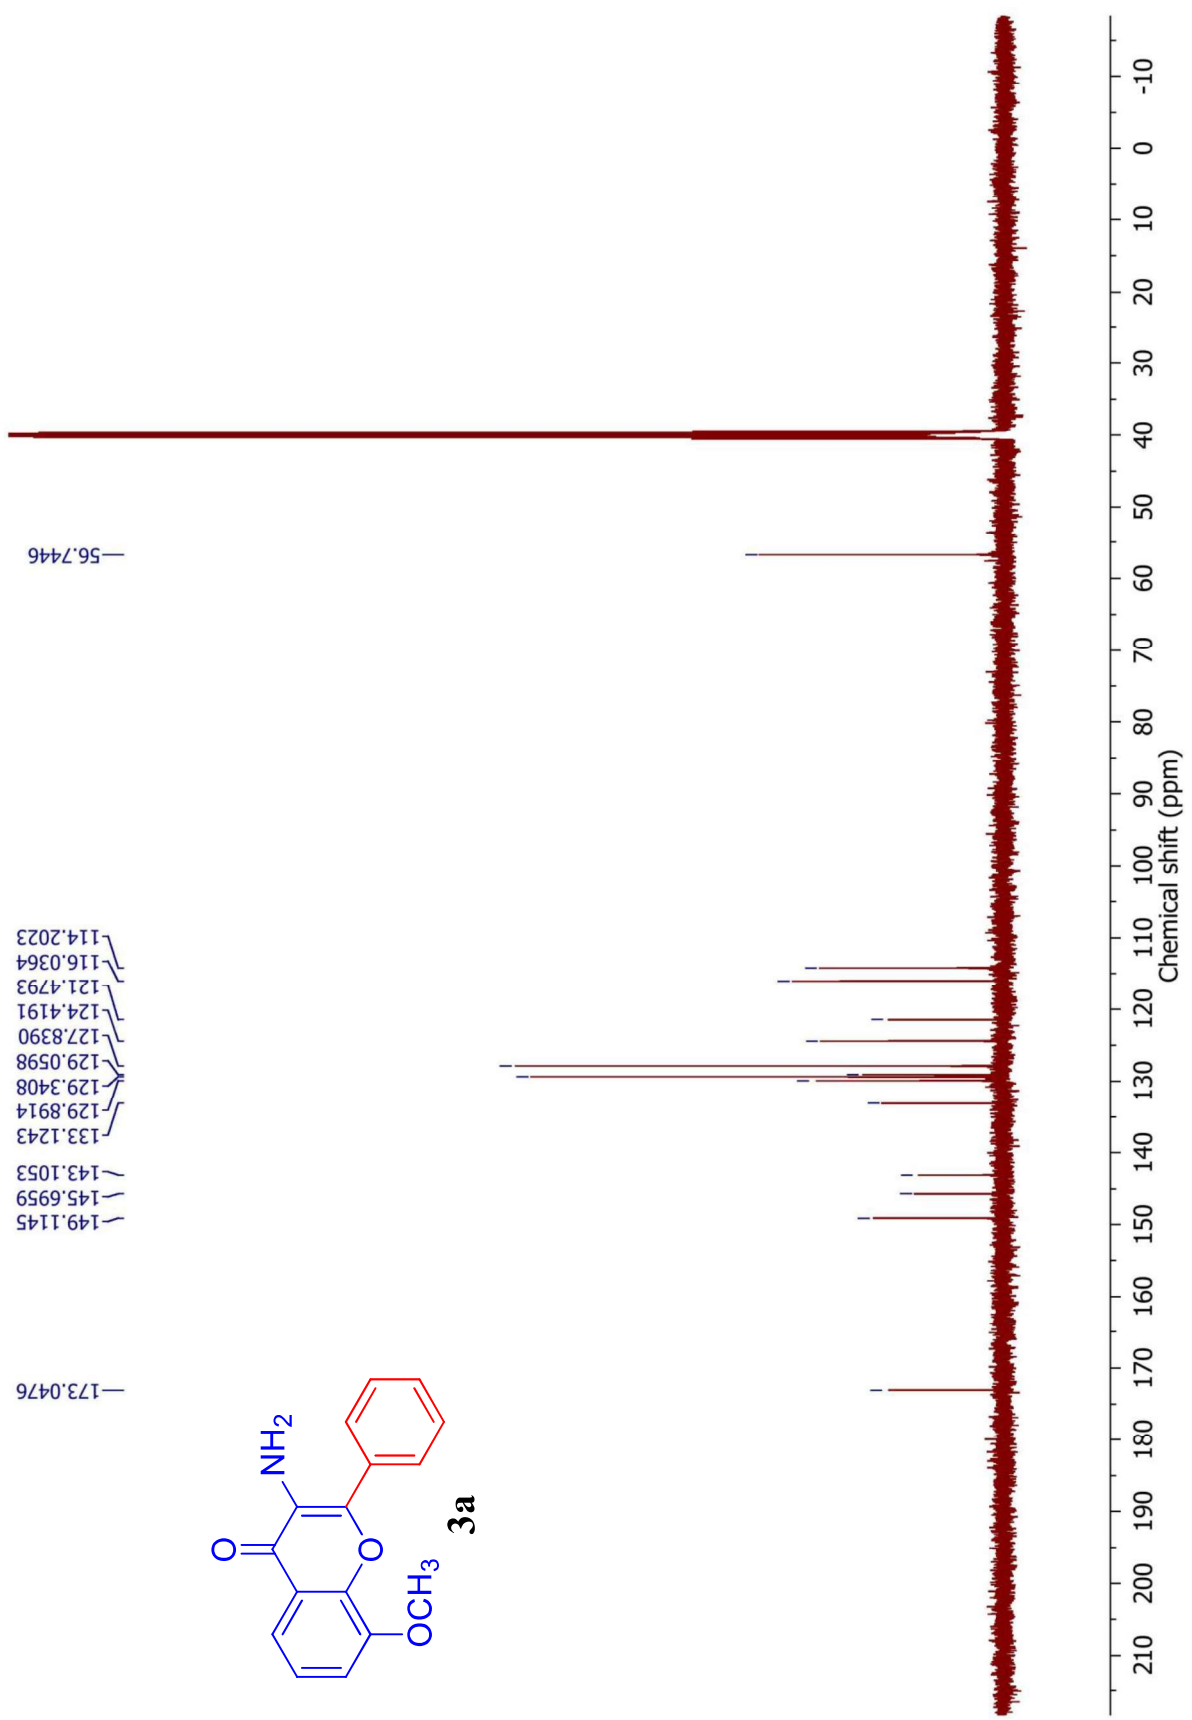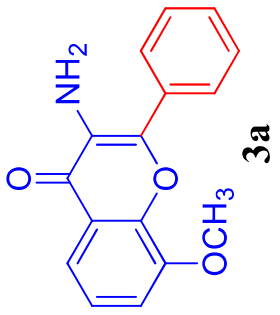



# Display Report

**Analysis Info**  
Analysis Name D:\Data\User Data\Dr. Jerome\MNTE89.d  
Method Tune\_pos\_Standard.m  
Sample Name MEOH  
Comment  
Acquisition Date 7/24/2019 3:14:42 PM  
Operator HRMS  
Instrument maxis impact 1819696.00160

**Acquisition Parameter**  
Source Type ESI  
Polarity Positive  
Scan Range 50 m/z  
Scan End 3000 m/z  
Ion Polarity Positive  
Set Corona 4500 V  
Set End Plate Offset -500 V  
Set Charging Voltage 2000 V  
Set Corona 0 nA  
Set Nebuliser 0.5 Bar  
Set Dry Gas 200 °C  
Set Divert Valve 4.0 l/min  
Set APCI Heater 0 °C

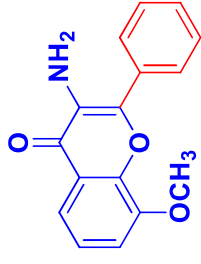

3a

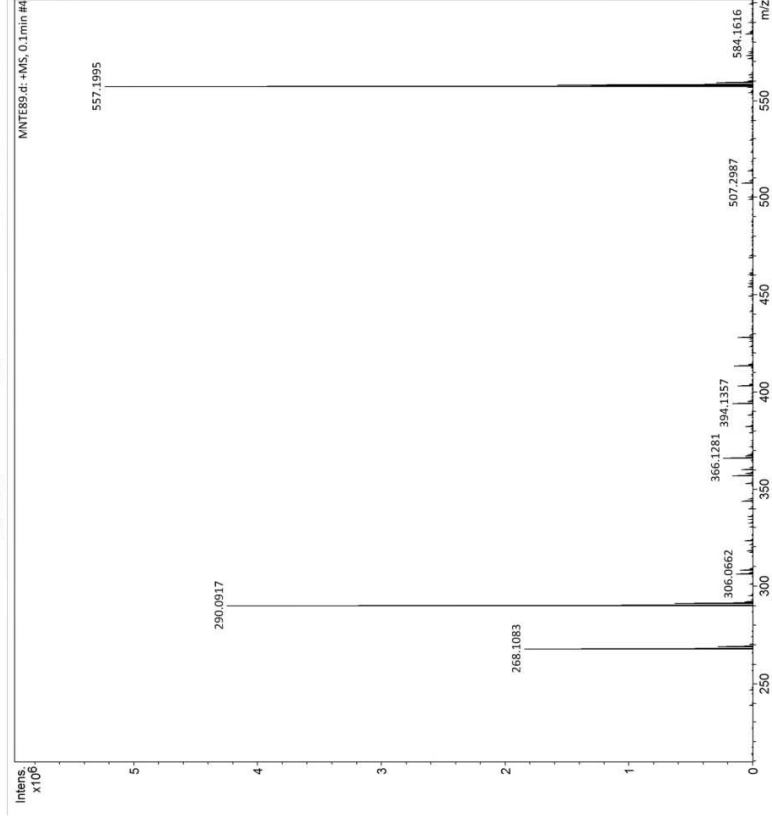

7E90

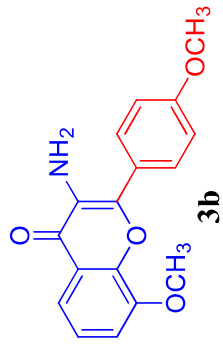

7.9934  
7.9756  
7.7011  
7.6956  
7.6878  
7.6823  
7.4198  
7.4093  
7.3955  
7.3797  
7.2287  
7.2110  
4.6833  
4.0327  
3.9230

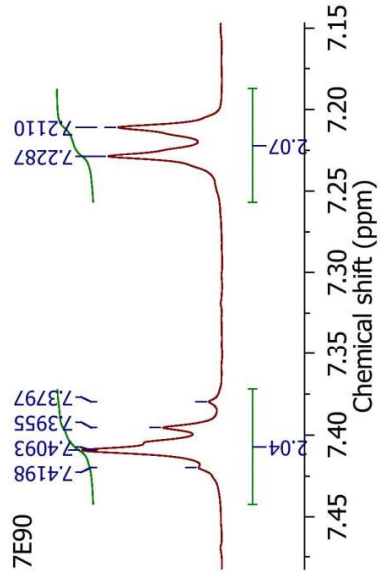

7.7011  
7.6956  
7.6878  
7.6823

7.9934  
7.9756

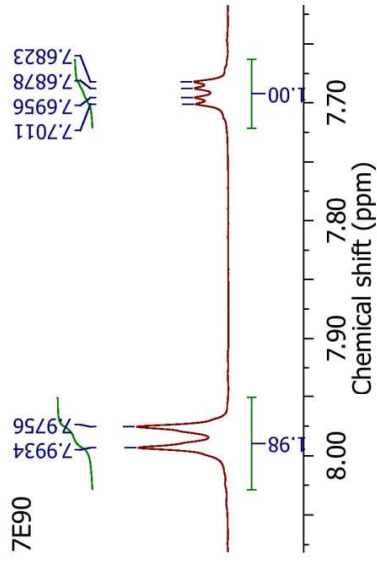

3.31  
3.08  
2.00  
2.07  
2.04  
1.00  
1.98

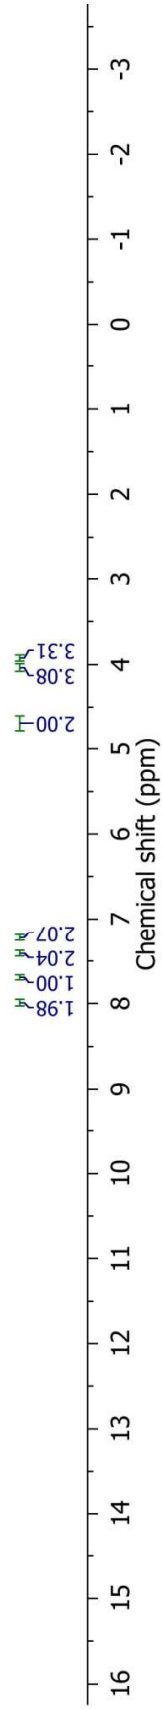

16 15 14 13 12 11 10 9 8 7 6 5 4 3 2 1 0 -1 -2 -3

Chemical shift (ppm)

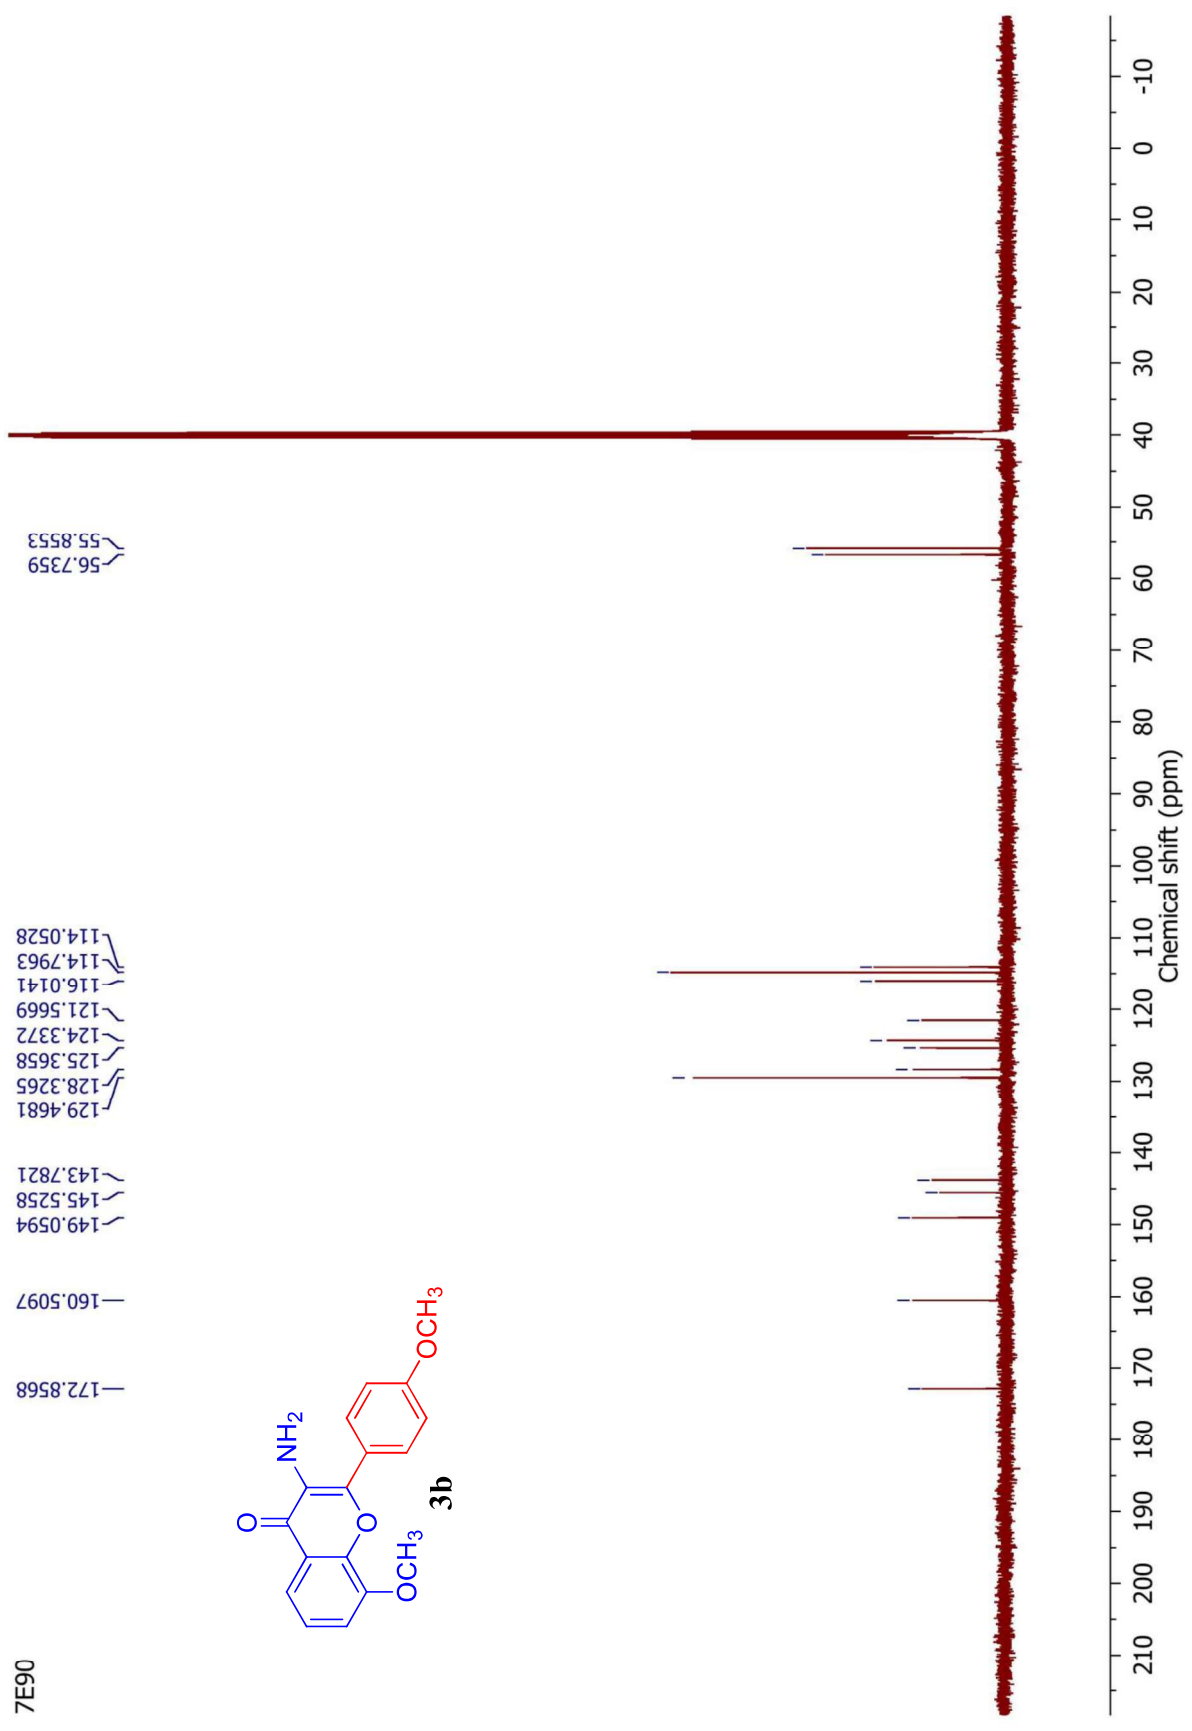

7E90

# Display Report

**Analysis Info**  
Analysis Name D:\Data\User Data\Dr. Jerome\MNTE90.d  
Method Tune\_pos\_Standard.m  
Sample Name BLANK  
Comment  
Acquisition Date 7/23/2019 11:48:46 AM  
Operator HRMS  
Instrument maxis impact 1819696.00160

**Acquisition Parameter**  
Source Type ESI  
Fusion Active  
Scan Begin 50 m/z  
Scan End 3000 m/z  
Ion Polarity Positive  
Set Capillary 4500 V  
Set End Plate Offset -500 V  
Set Charging Voltage 2000 V  
Set Corona 0 nA  
Set Nebuliser 0.5 Bar  
Set Dry Gas Heater 200 °C  
Set Dry Gas 4.0 l/min  
Set Divert Valve Source  
Set APCI Heater 0 °C

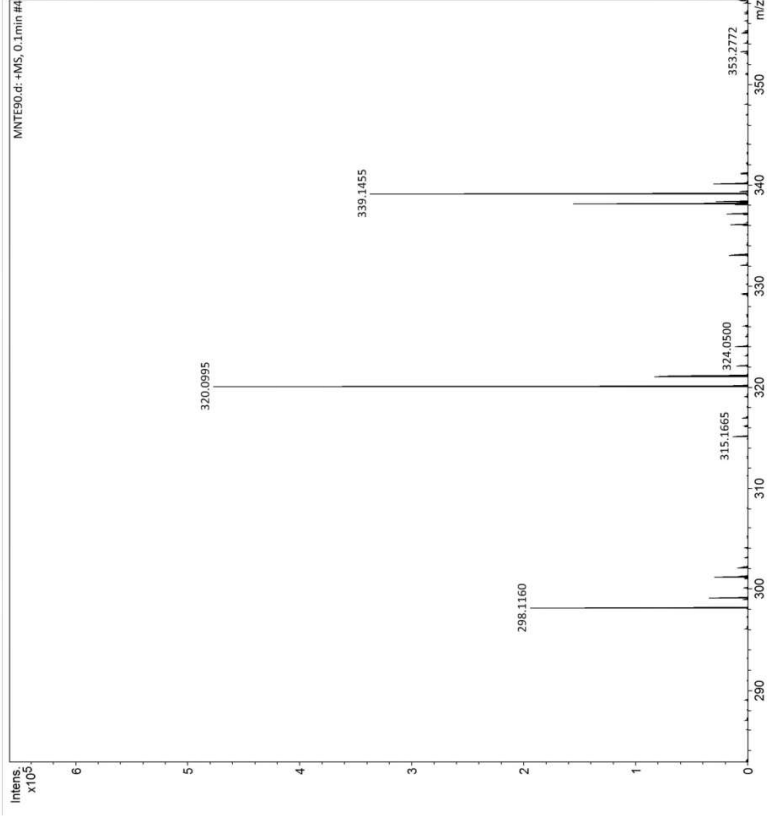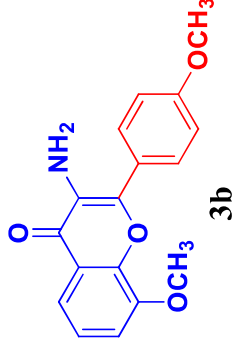

E1014

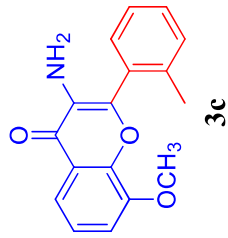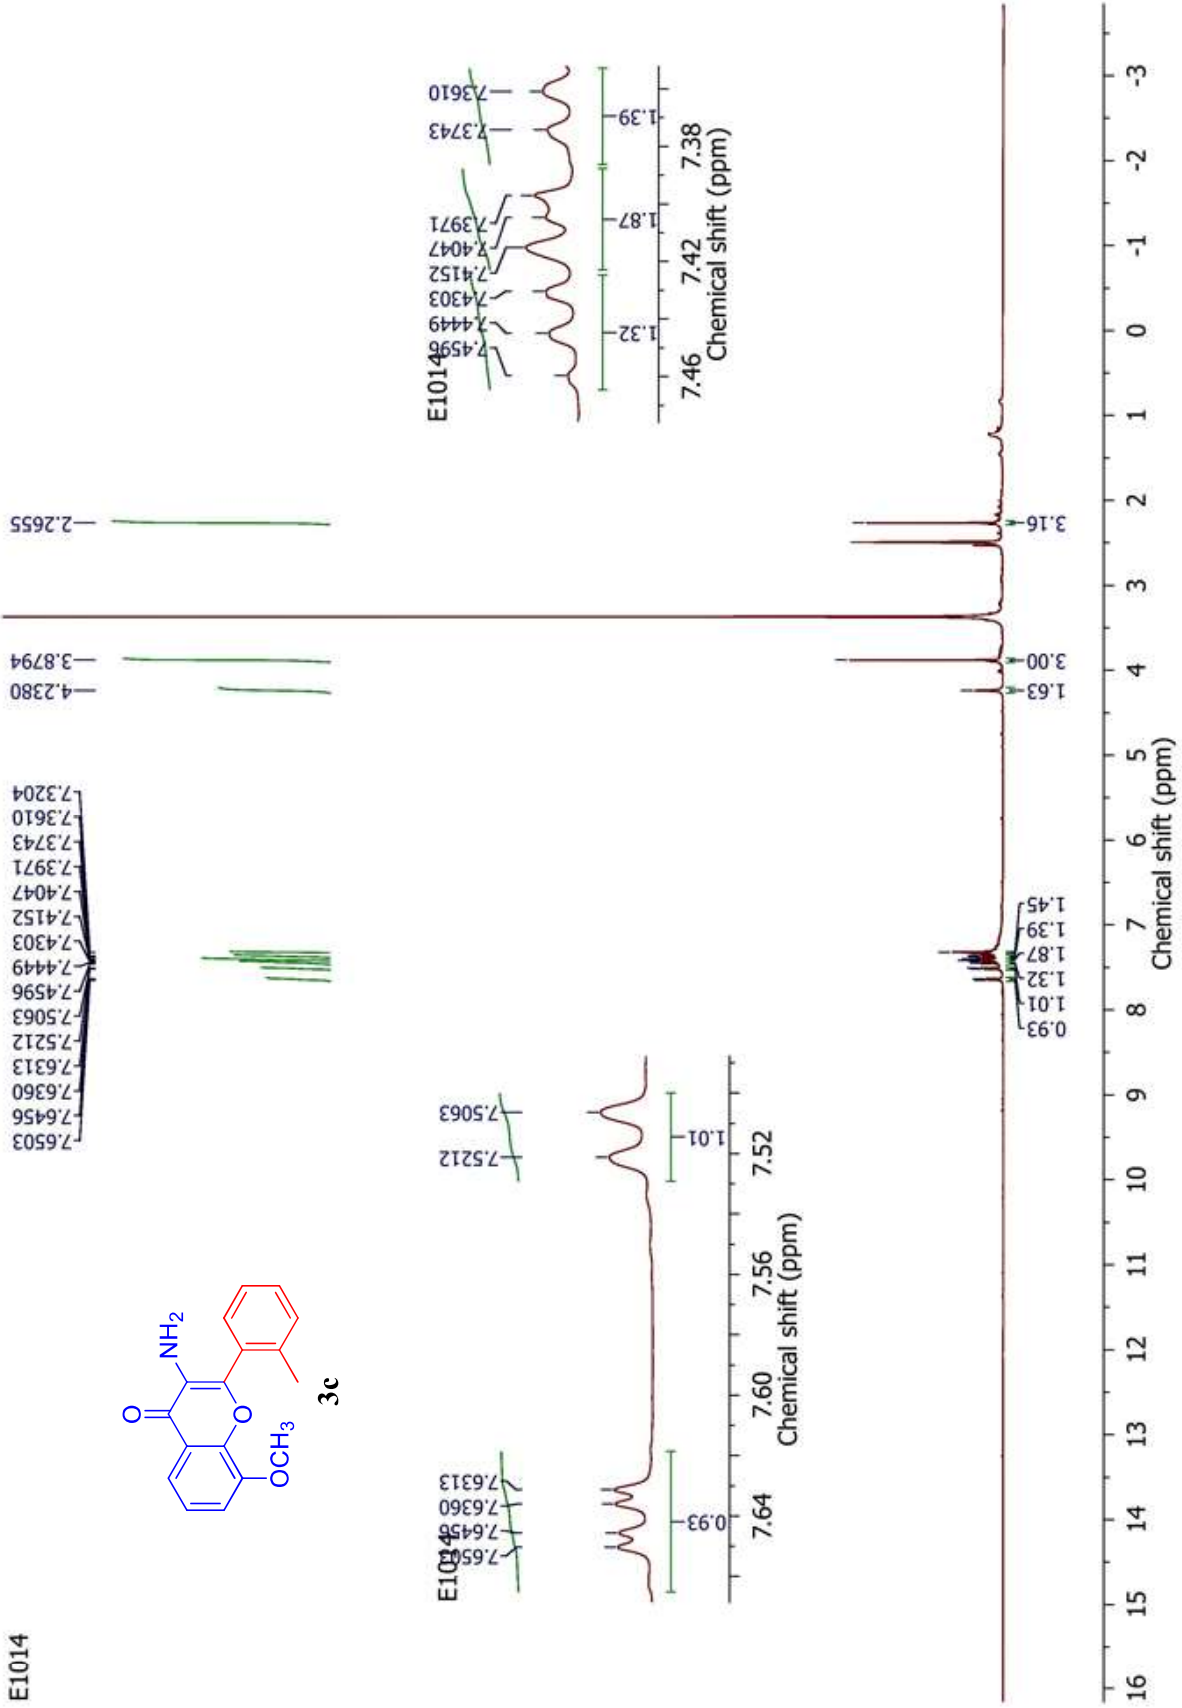

E1014 2

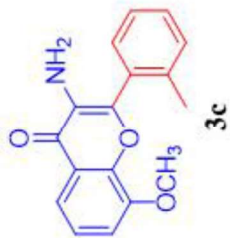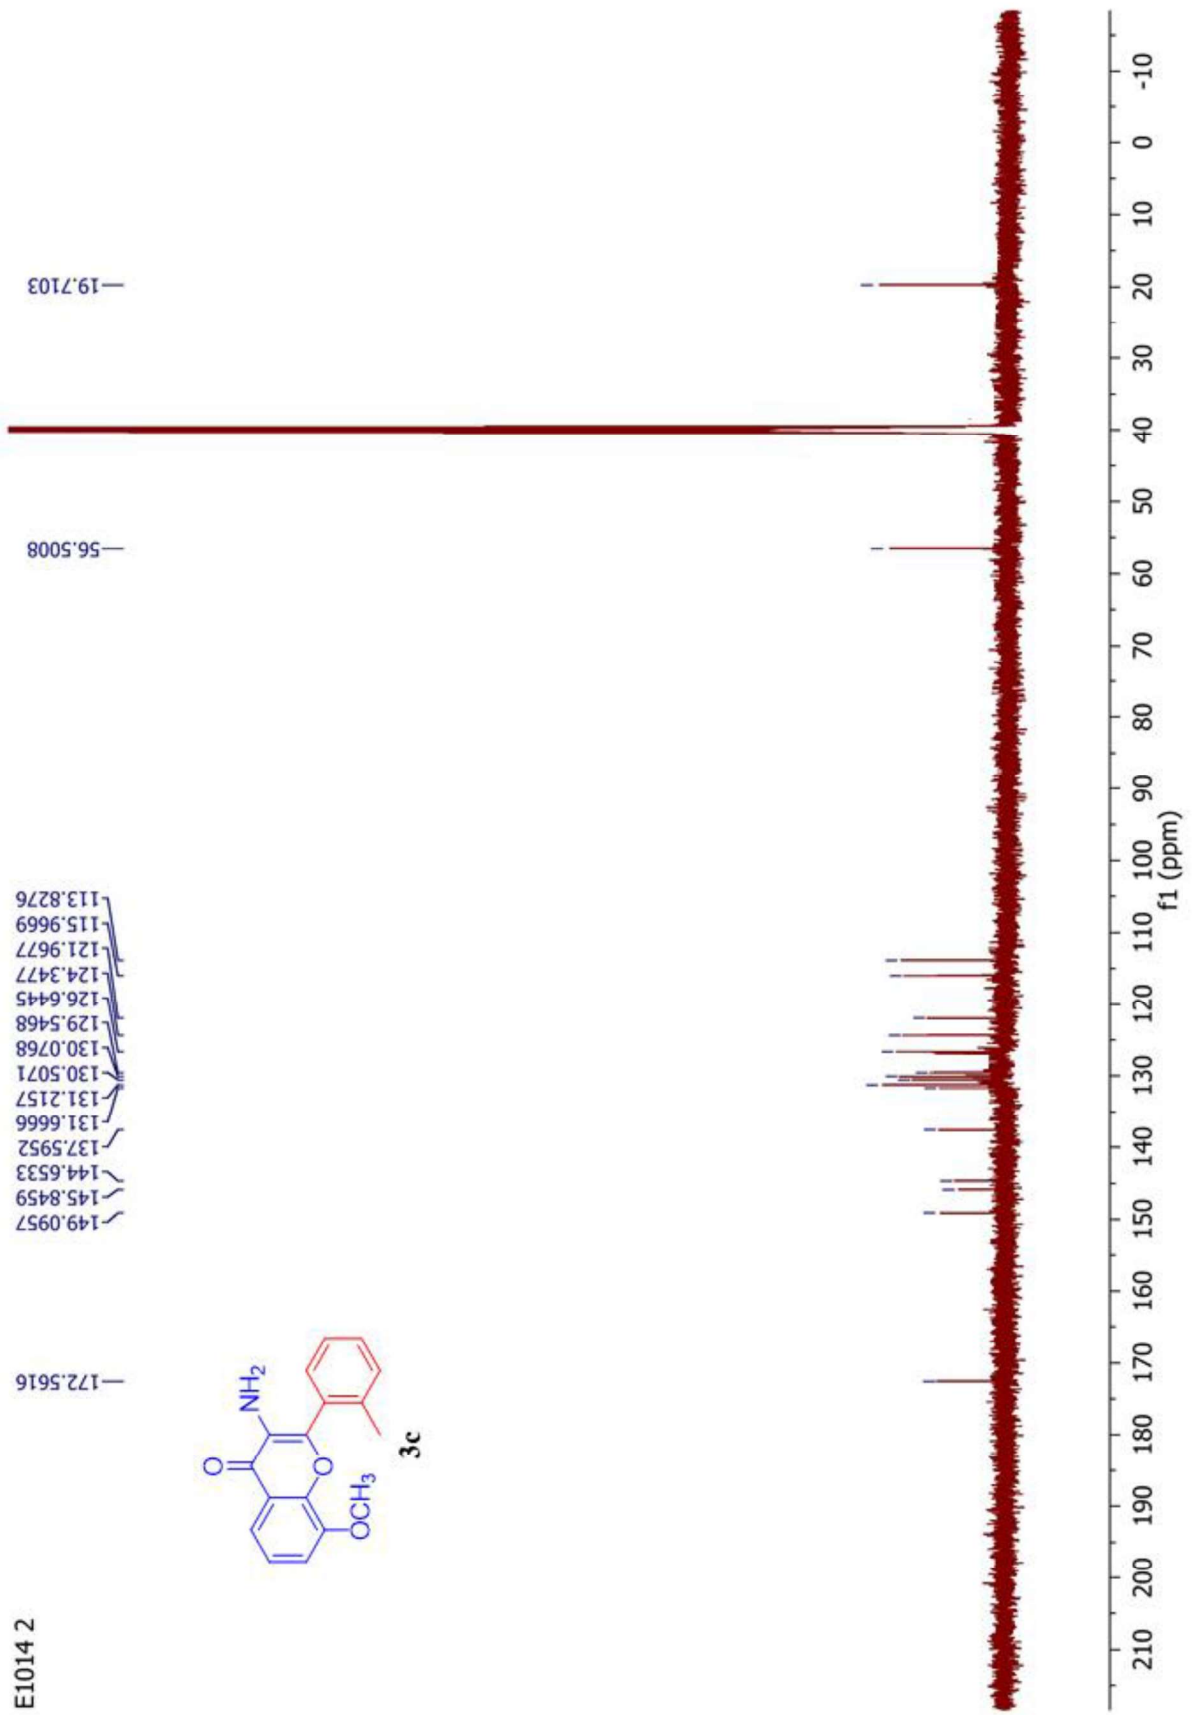



**Sample Name** Seenuvasan (1113) **Position** Vial 37 **User Name** Success  
**Inj Vol** 1 **InjPosition** ISOCRATIC.m **IRM Calibration Status** 12/6/2019 1:29:03 PM  
**Data Filename** SVM-31.d **ACQ Method** ISOCRATIC.m **SampleType** Sample **Comment** Acquired Time

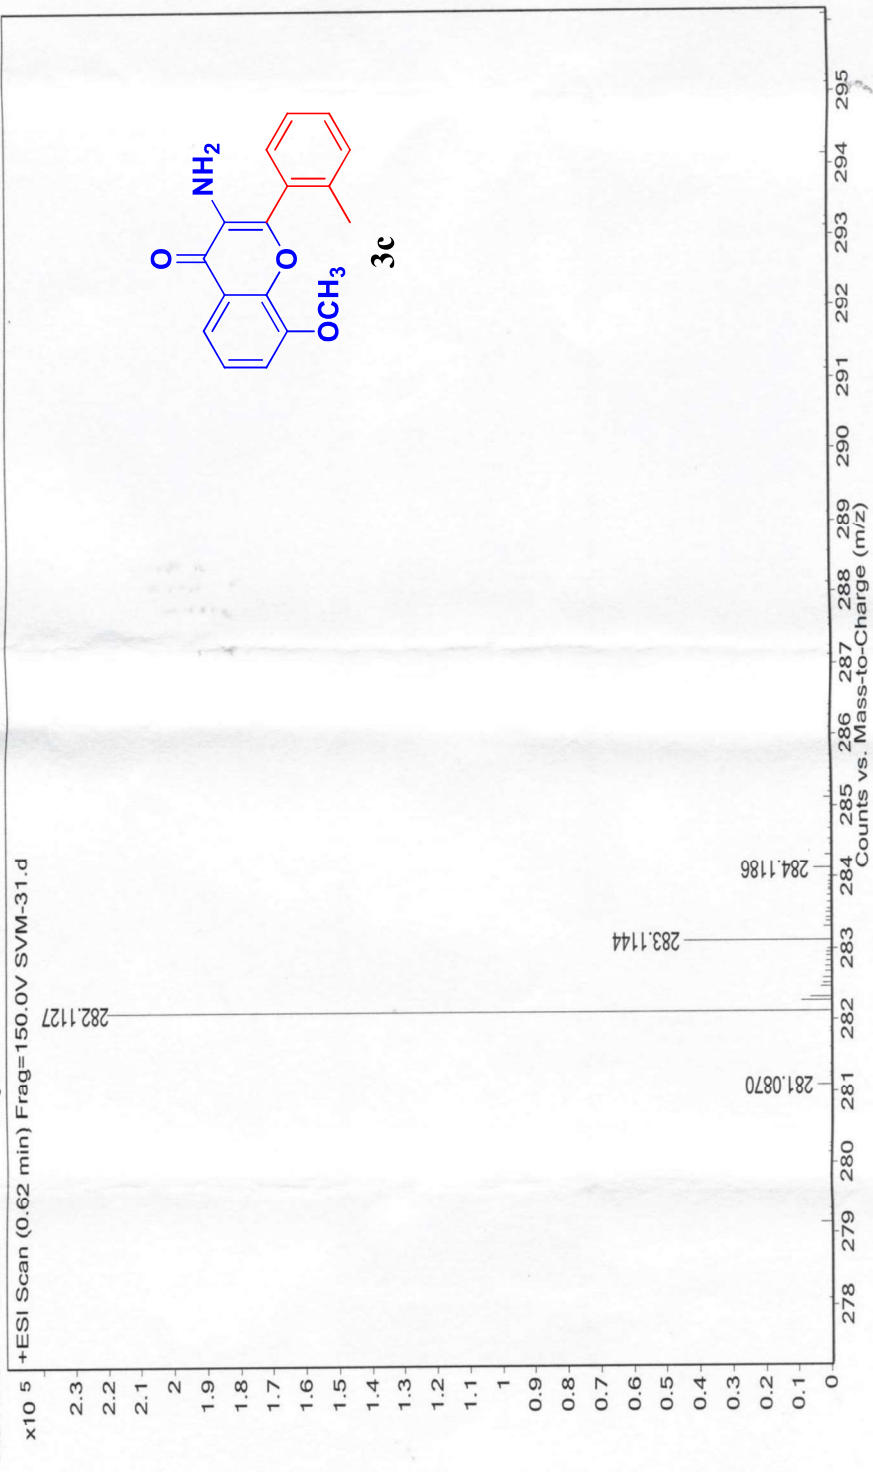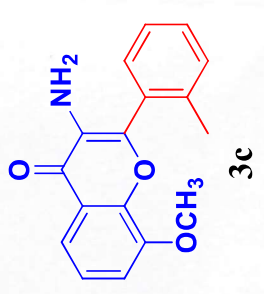

7E94

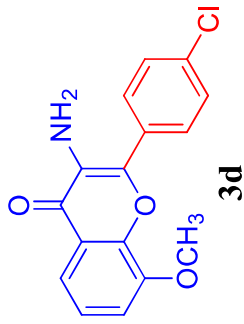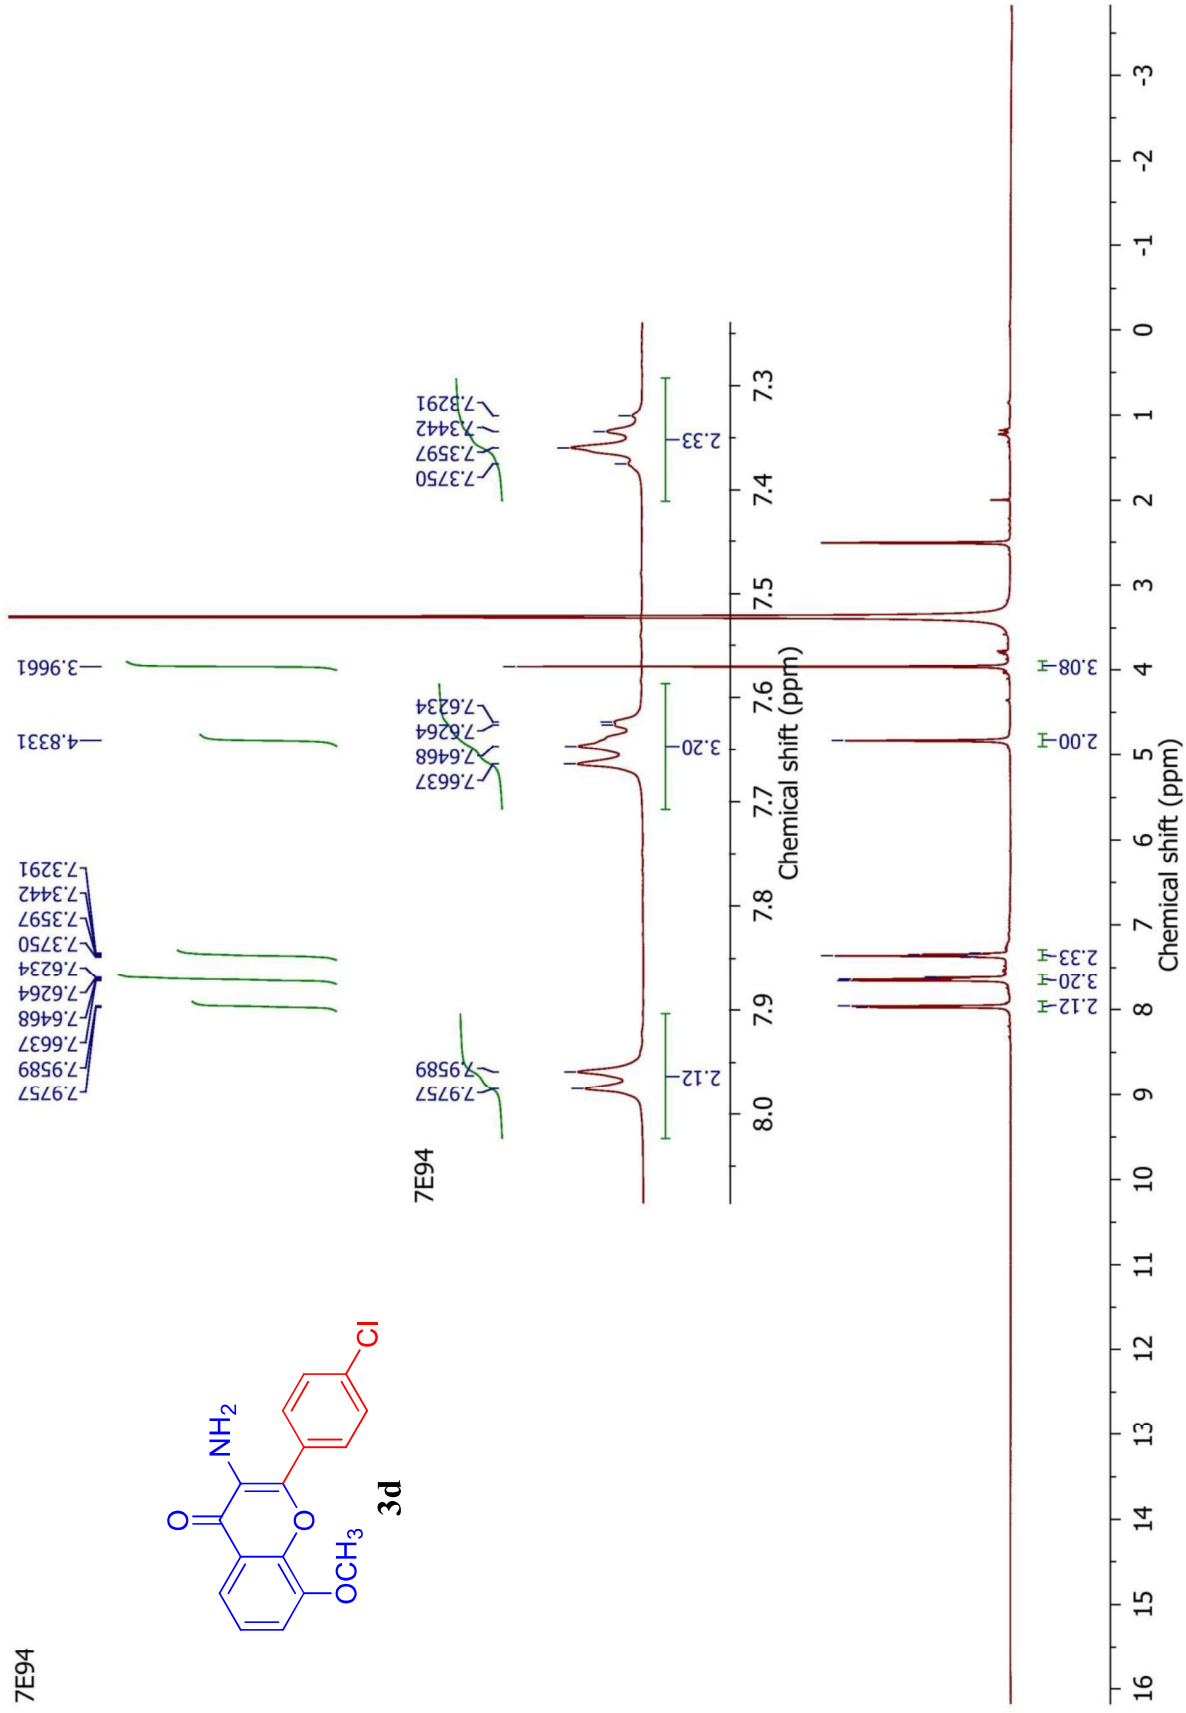

7E94

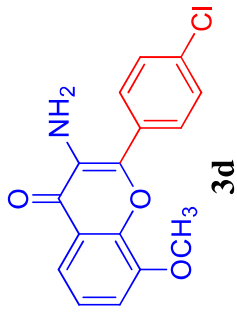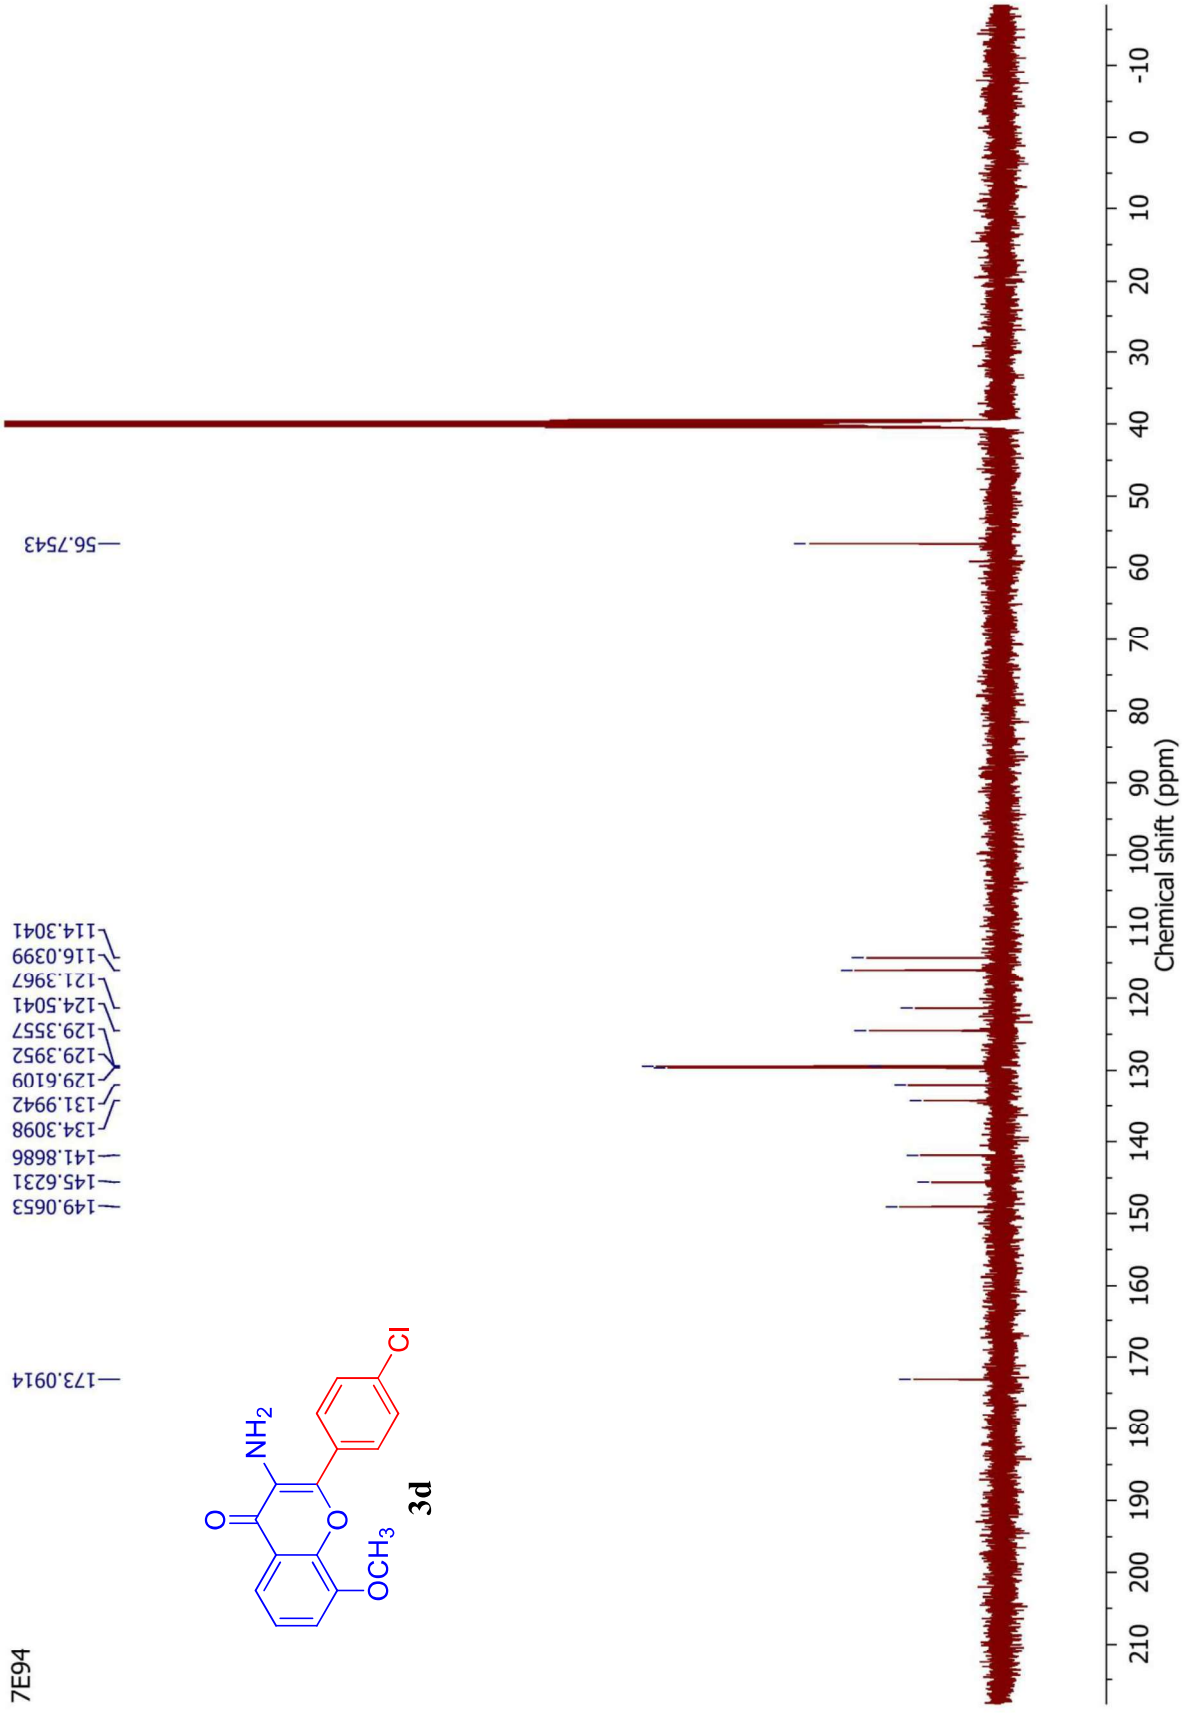

# Display Report

**Analysis Info**  
Analysis Name D:\Data\User Data\Dr. Jerome\MNTE94.d  
Method Tune\_pos\_Standard.m  
Sample Name BLANK  
Comment  
Acquisition Date 7/23/2019 11:33:14 AM  
Operator HRMS  
Instrument maxis impact 1819696.00160

**Acquisition Parameter**  
Source Type ESI  
Source Active  
Scan Begin 50 m/z  
Scan End 3000 m/z  
Ion Polarity Positive  
Set Corona 4500 V  
Set End Plate Offset -500 V  
Set Charging Voltage 2000 V  
Set Corona 0 nA  
Set Nebuliser 0.5 Bar  
Set Dry Gas Heater 200 °C  
Set Dry Gas 4.0 l/min  
Set Divert Valve Source  
Set APCI Heater 0 °C

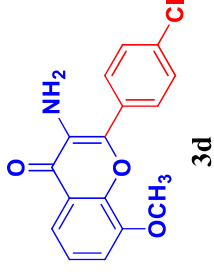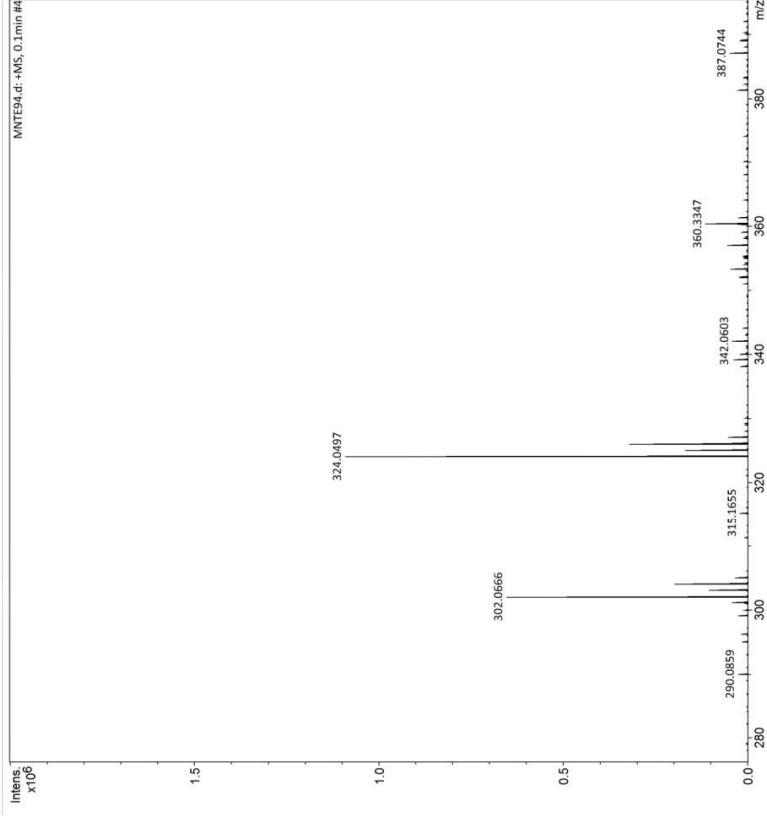

7E95

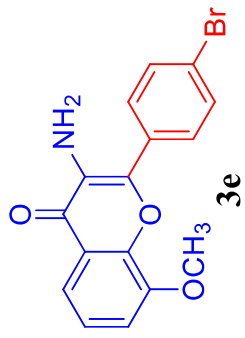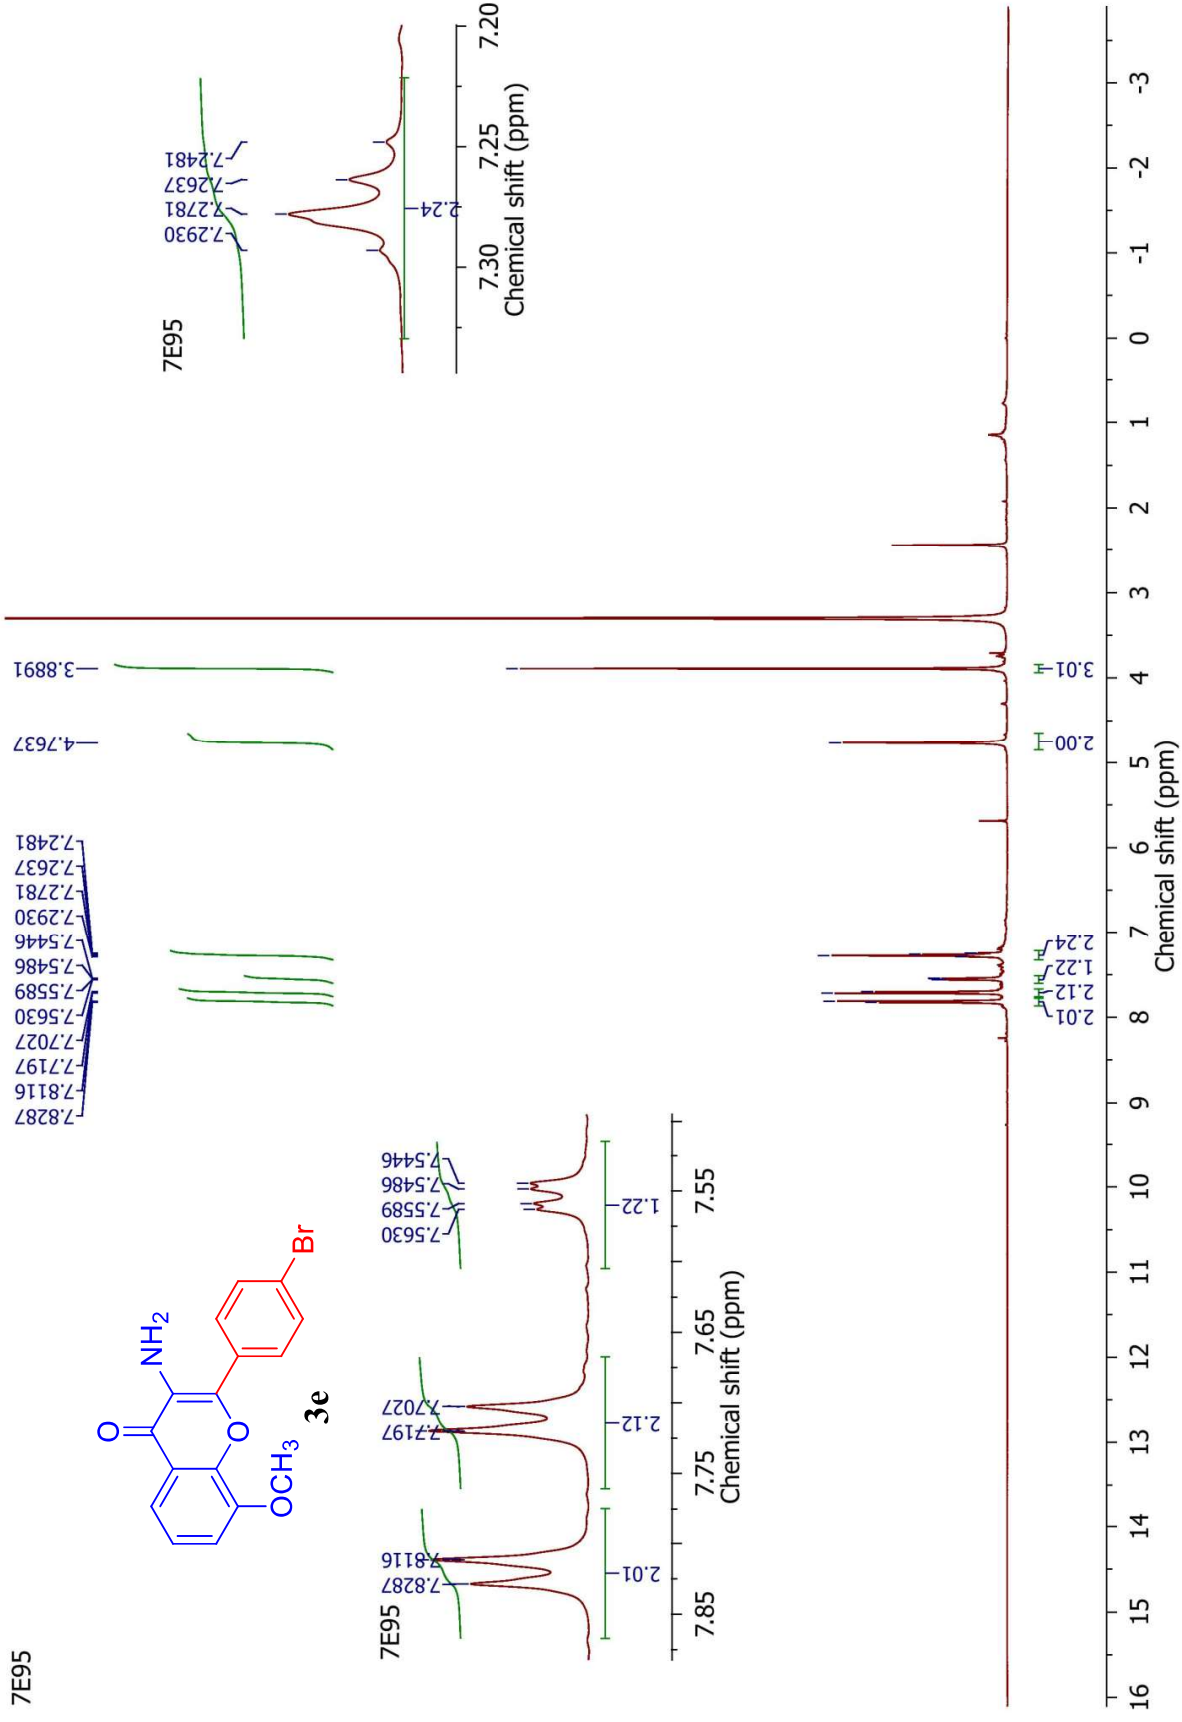



7E95

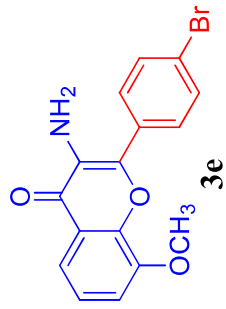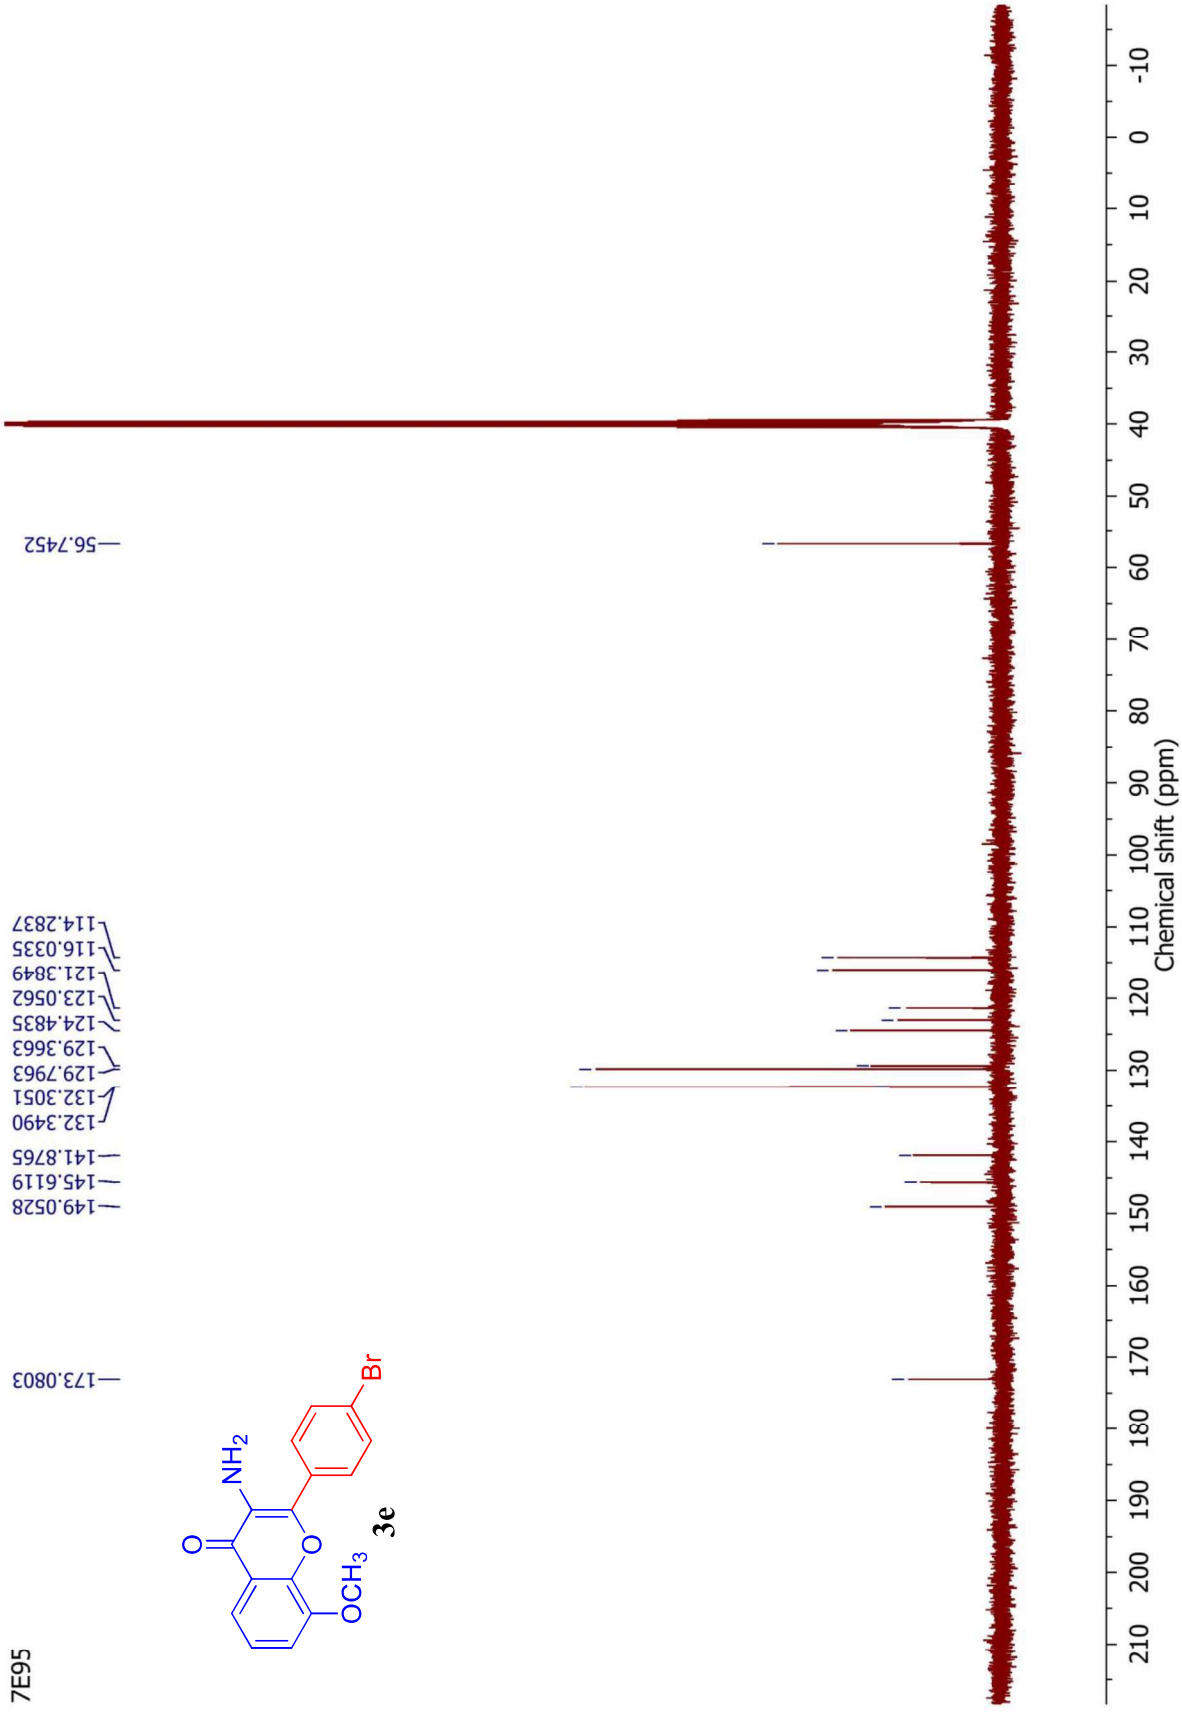

# Display Report

**Analysis Info**  
Analysis Name D:\Data\User Data\Dr. Jerome\MNTE95.d  
Method Tune\_pos\_Standard.m  
Sample Name MEOH  
Comment

Acquisition Date 7/24/2019 2:35:44 PM  
Operator HRMS  
Instrument maxis impact 1819696.00160

**Acquisition Parameter**

|             |          |                      |          |                  |           |
|-------------|----------|----------------------|----------|------------------|-----------|
| Source Type | ESI      | Ion Polarity         | Positive | Set Nebuliser    | 0.5 Bar   |
| Flow Rate   | Active   | Set Corona           | 4500 V   | Set Dry Heater   | 200 °C    |
| Scan Begin  | 50 m/z   | Set End Plate Offset | -500 V   | Set Dry Gas      | 4.0 l/min |
| Scan End    | 3000 m/z | Set Charging Voltage | 2000 V   | Set Divert Valve | Source    |
|             |          | Set Corona           | 0 nA     | Set APCI Heater  | 0 °C      |

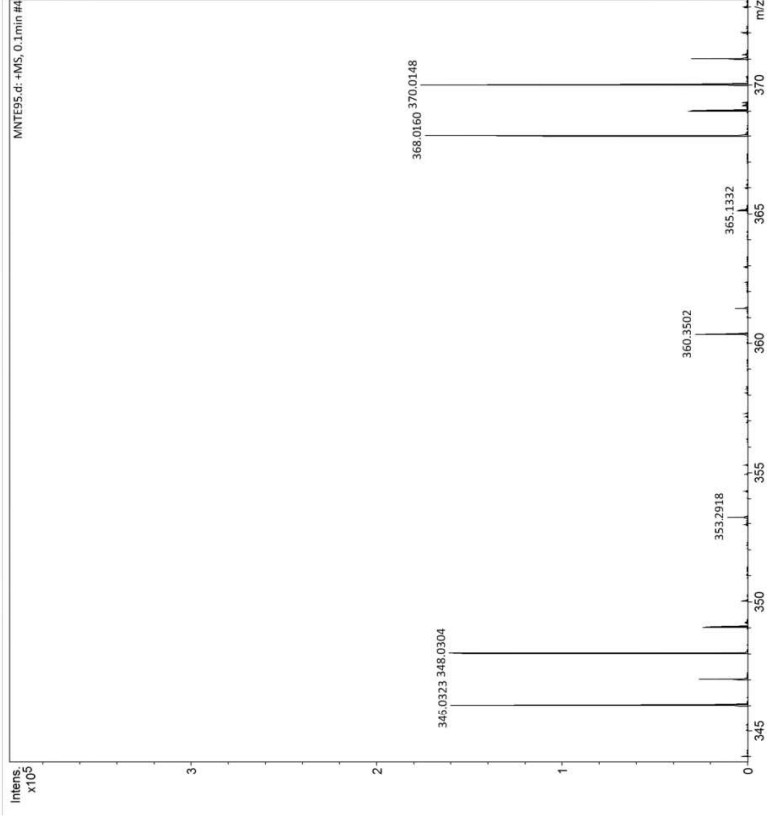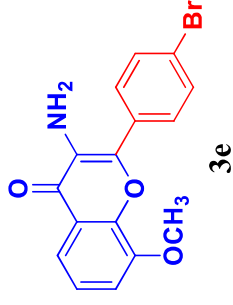

E932

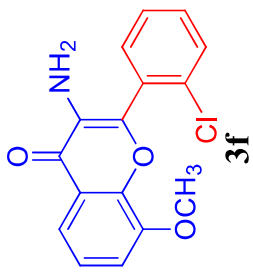

7.6996  
7.6847  
7.6769  
7.6719  
7.6626  
7.6578  
7.6177  
7.6017  
7.5948  
7.5873  
7.5629  
7.5480  
7.5330  
7.3782  
7.3748  
7.3624  
7.3591  
7.3473  
7.3318

3.8982  
2.8045  
2.8018

E932

7.6996  
7.6847  
7.6769  
7.6719  
7.6626  
7.6578

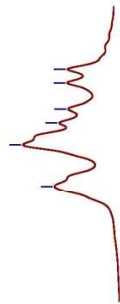

E932

7.6177  
7.6017  
7.5948  
7.5873  
7.5629  
7.5480  
7.5330

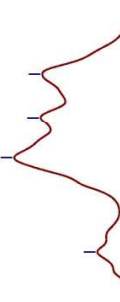

E932

7.5629  
7.5480  
7.5330

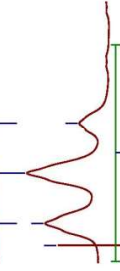

E932

7.3782  
7.3748  
7.3624  
7.3591  
7.3473  
7.3318

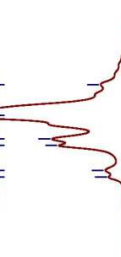

3.10  
1.84  
1.22  
1.95

16 15 14 13 12 11 10 9 8 7 6 5 4 3 2 1 0 -1 -2 -3

Chemical shift (ppm)

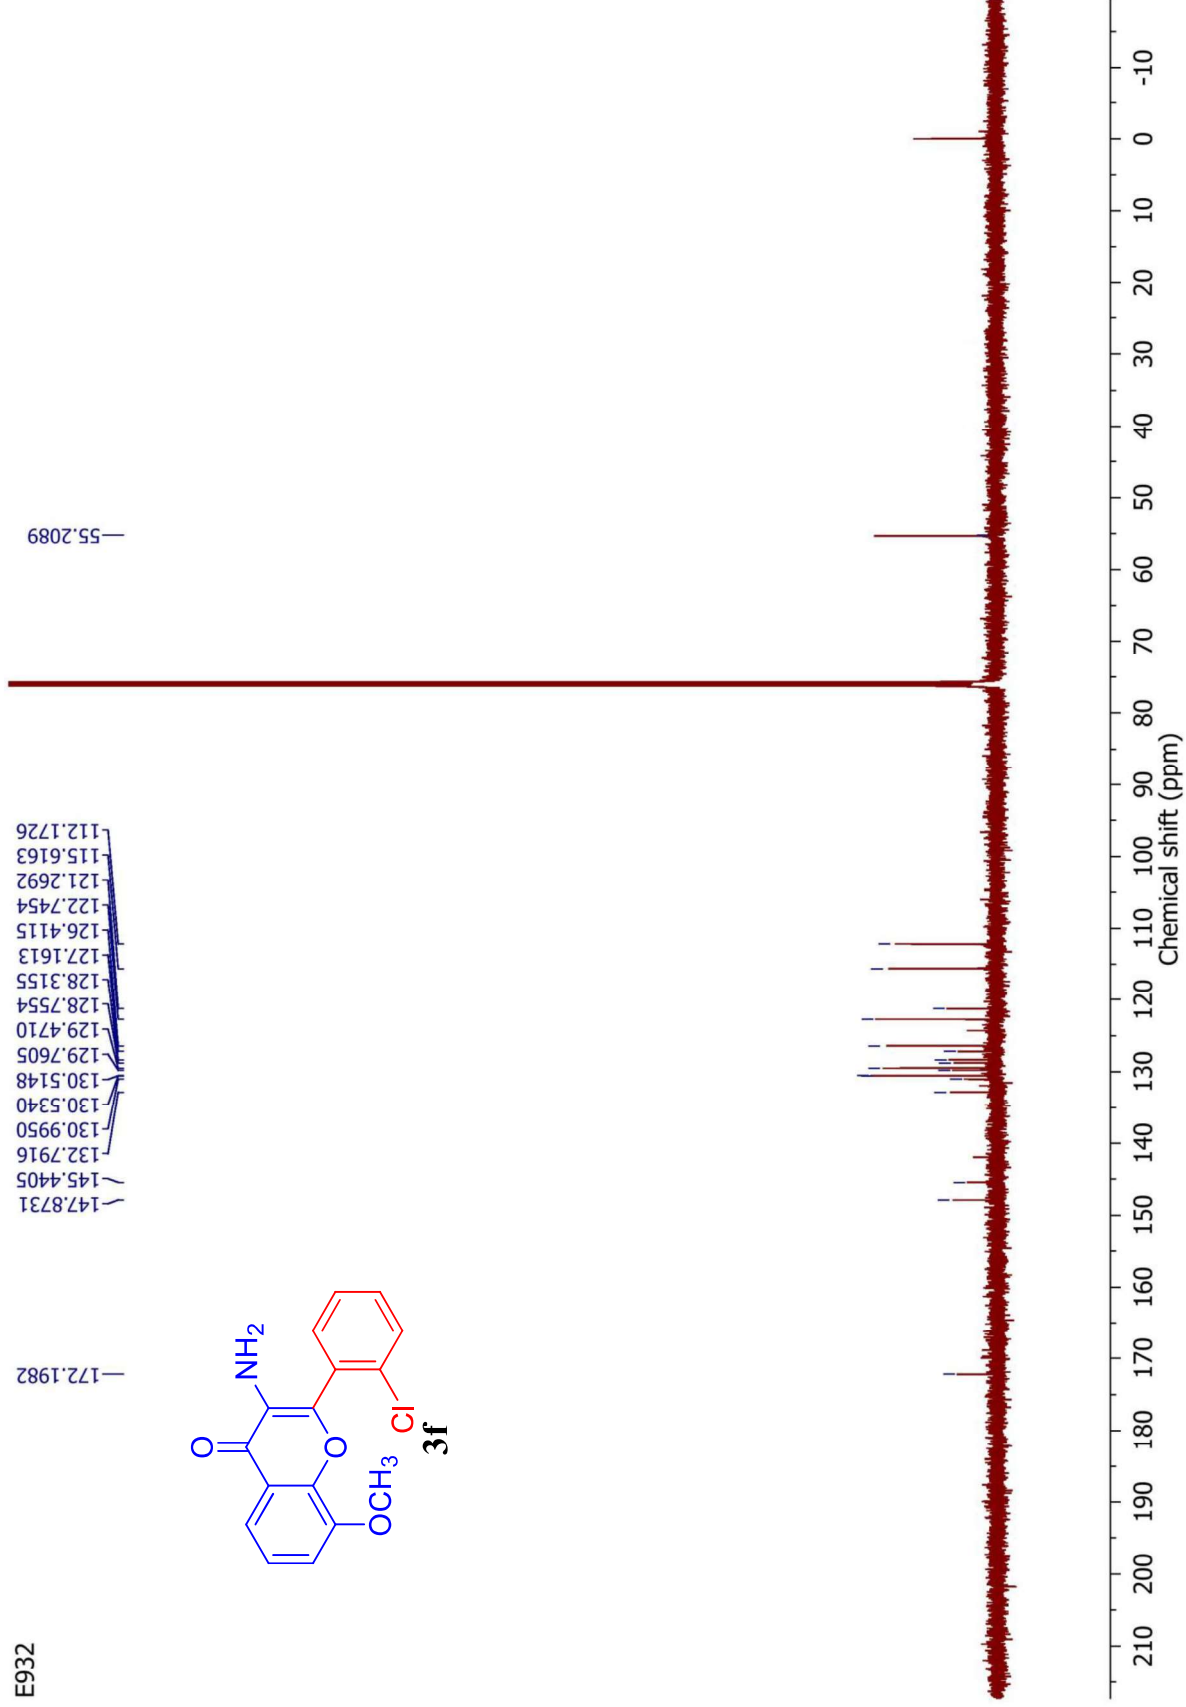

Sample Name: Seenivasan (1113)    Position: InjPosition    Instrument Name: Instrument 1    User Name: Success  
Inj Vol: 1    ACQ Method: SVM-32.d    SampleType: Sample    IRM Calibration Status: 12/6/2019 1:32:40 PM  
Data Filename: SVM-32.d    Method: ISOCRATIC.m    Comment:    Acquired Time: 12/6/2019 1:32:40 PM

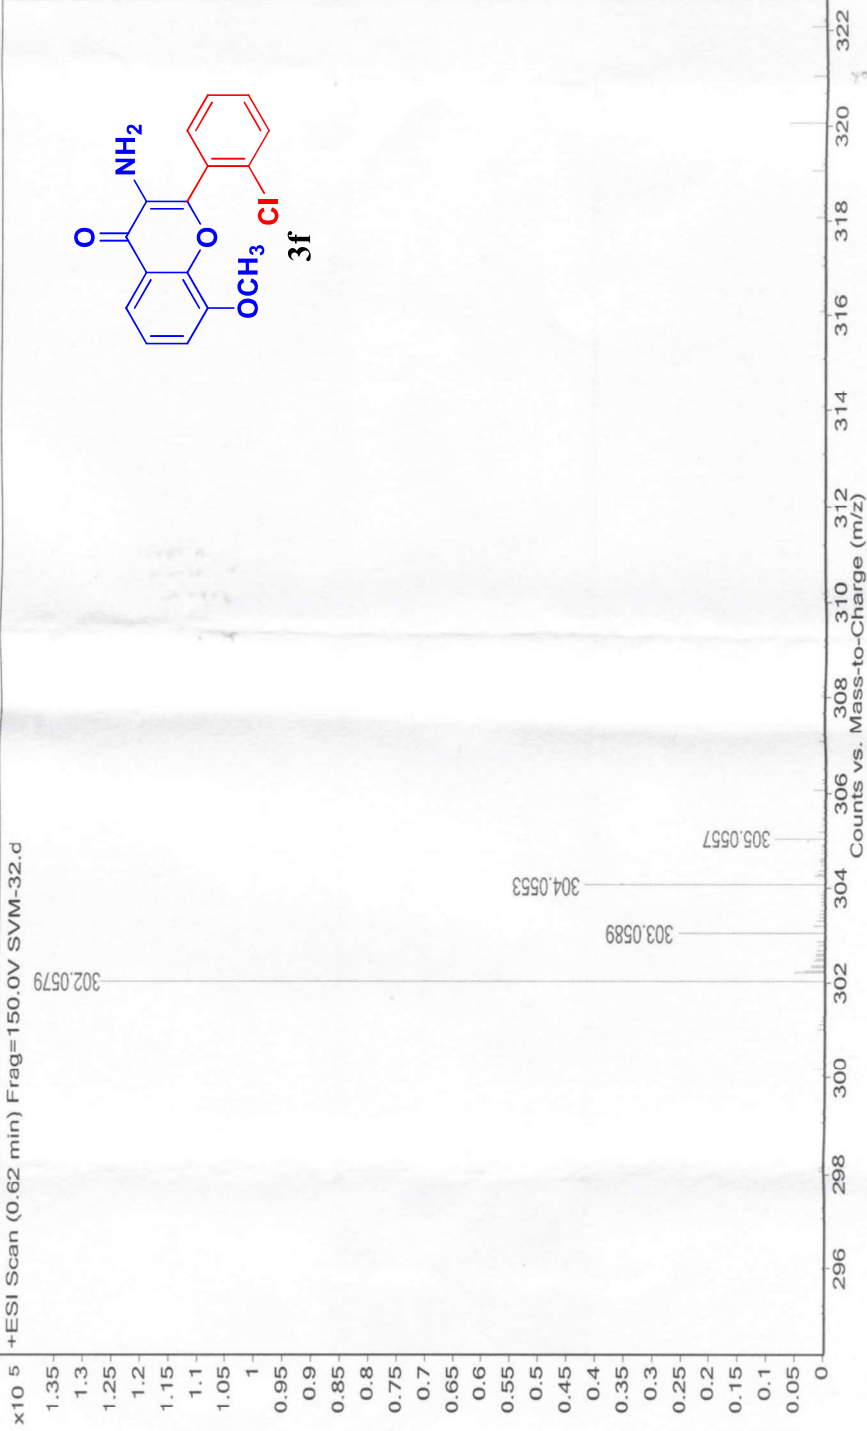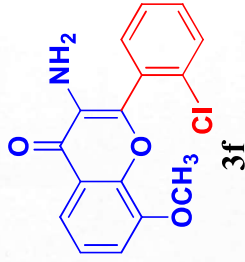

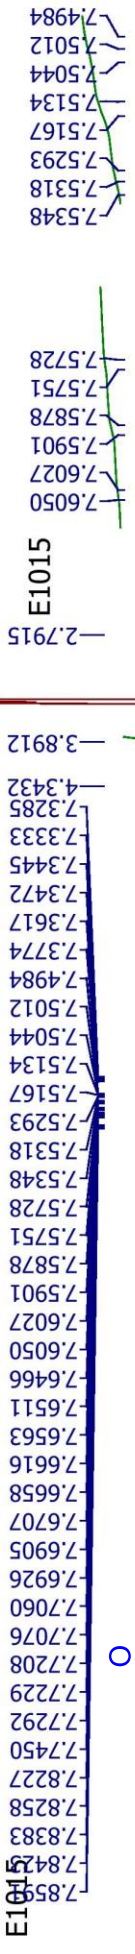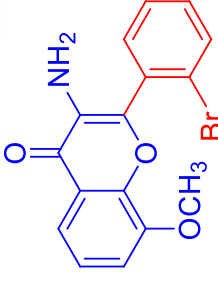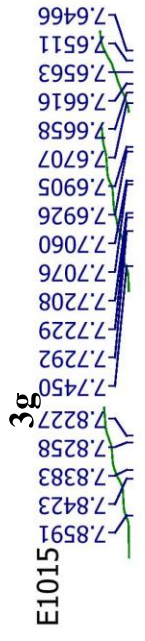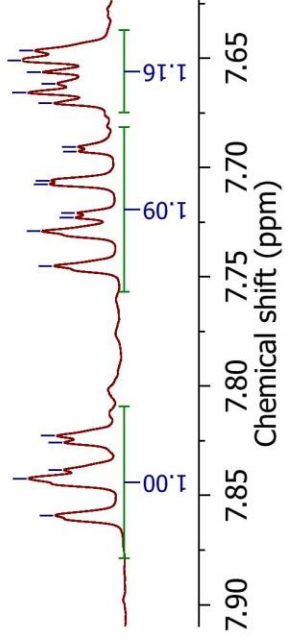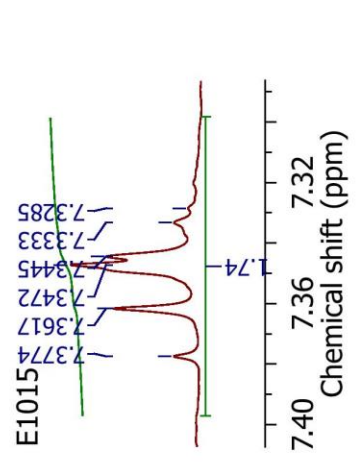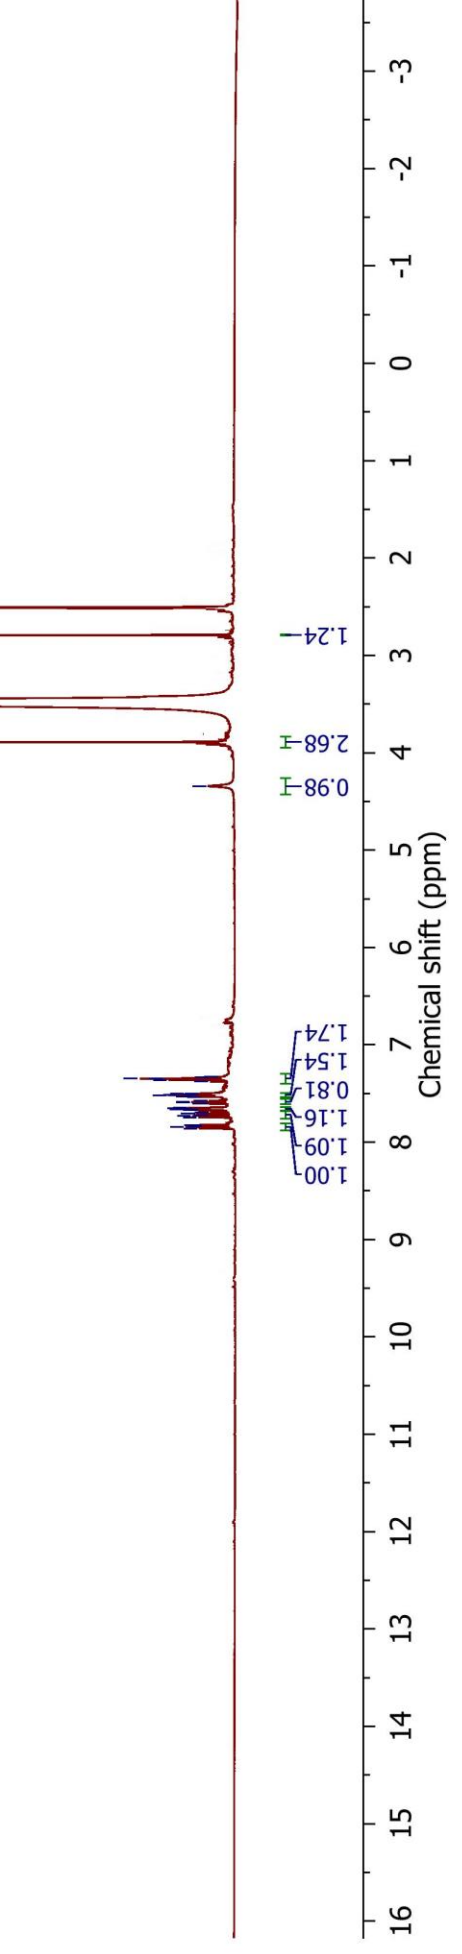



E1015 3

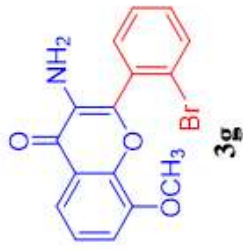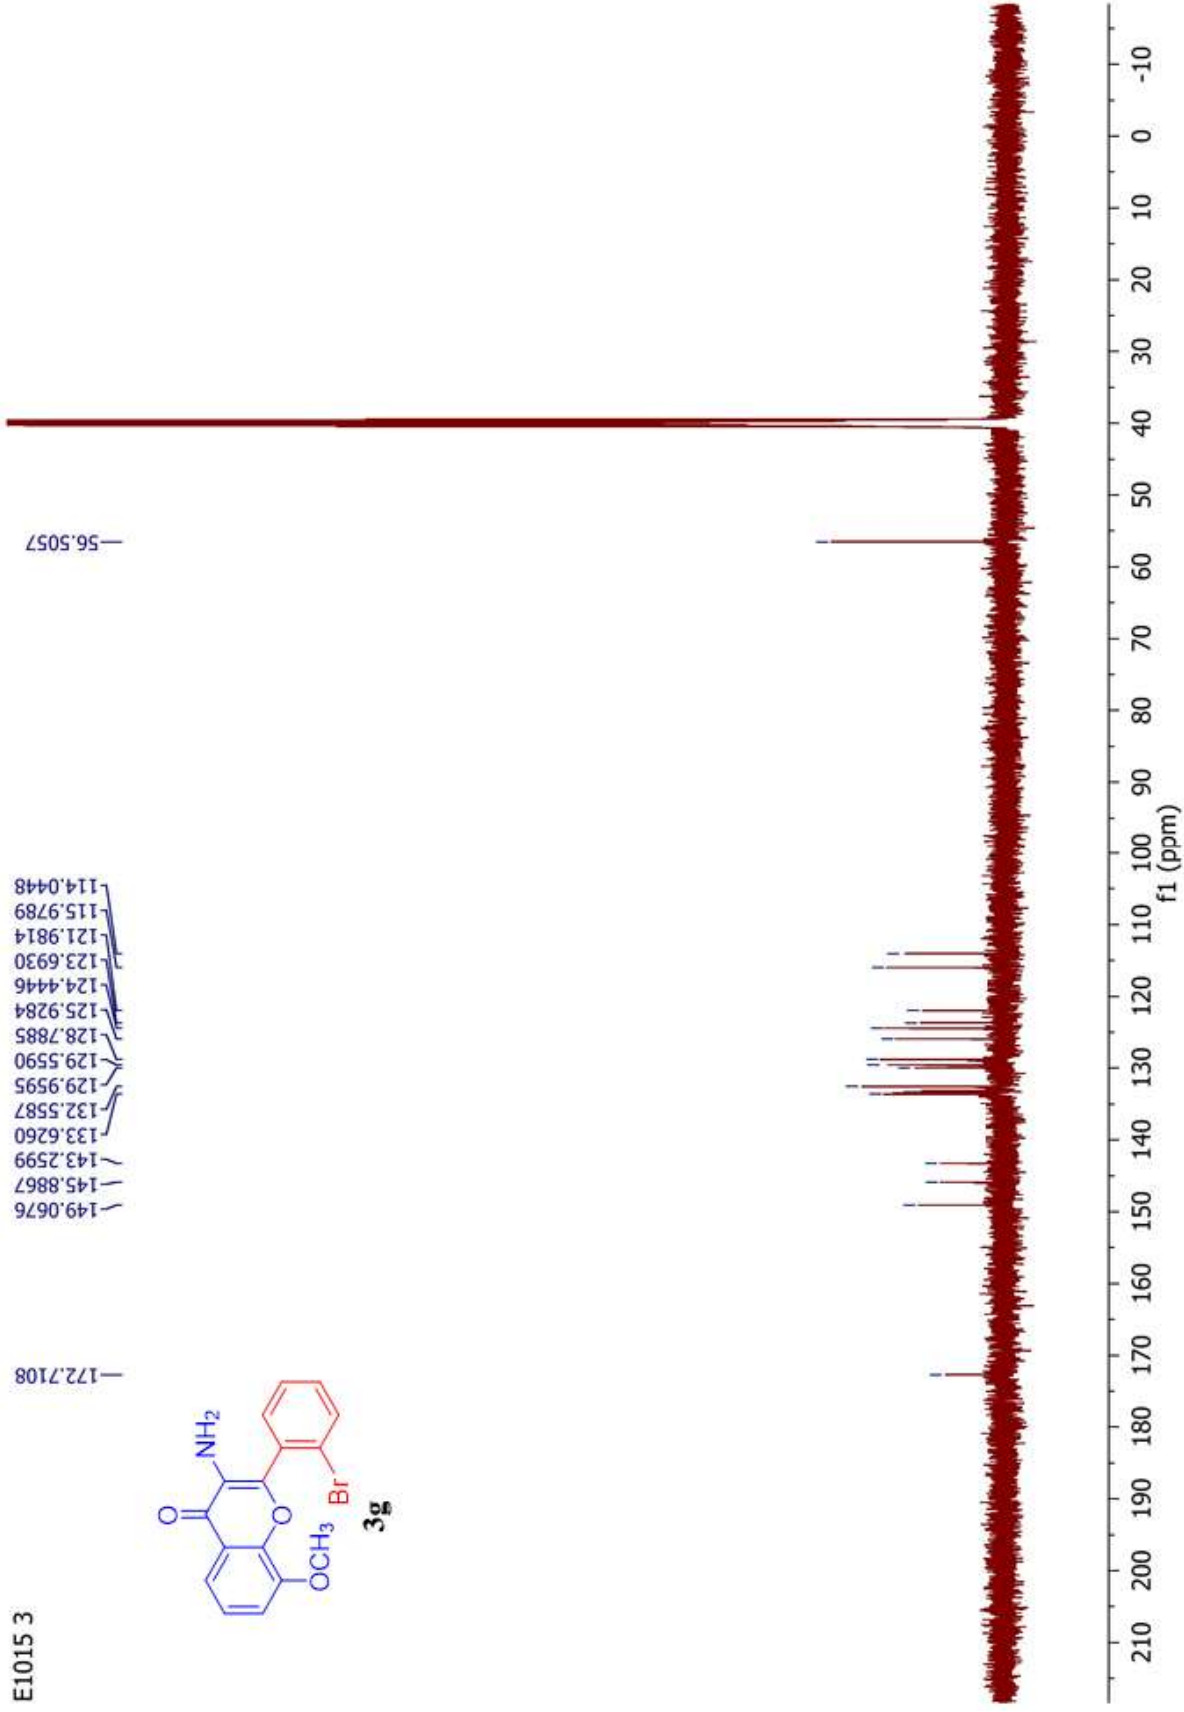

Sample Name: Seenivasan (1113)  
Inj Vol: 1  
Data Filename: SVM-29.d  
Position: InjPosition  
ACQ Method: ISOCRATIC.m  
Vial: 35  
Instrument Name: Instrument 1  
SampleType: Sample  
Comment:  
User Name: Success  
IRM Calibration Status: Success  
Acquired Time: 12/6/2019 1:21:44 PM

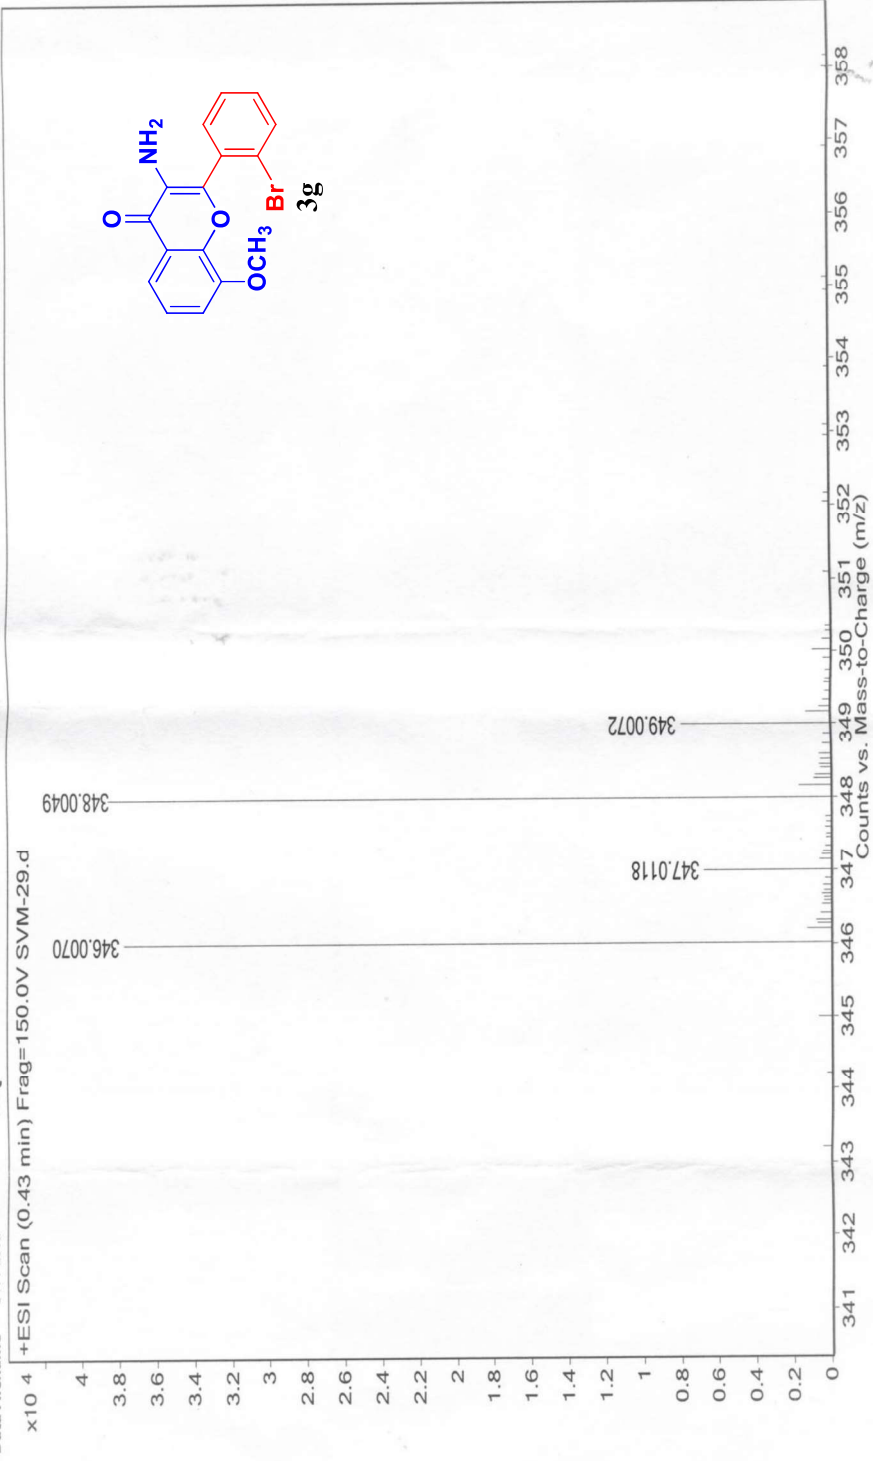

E984

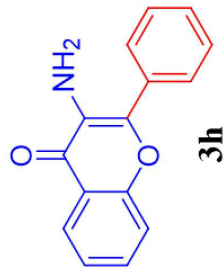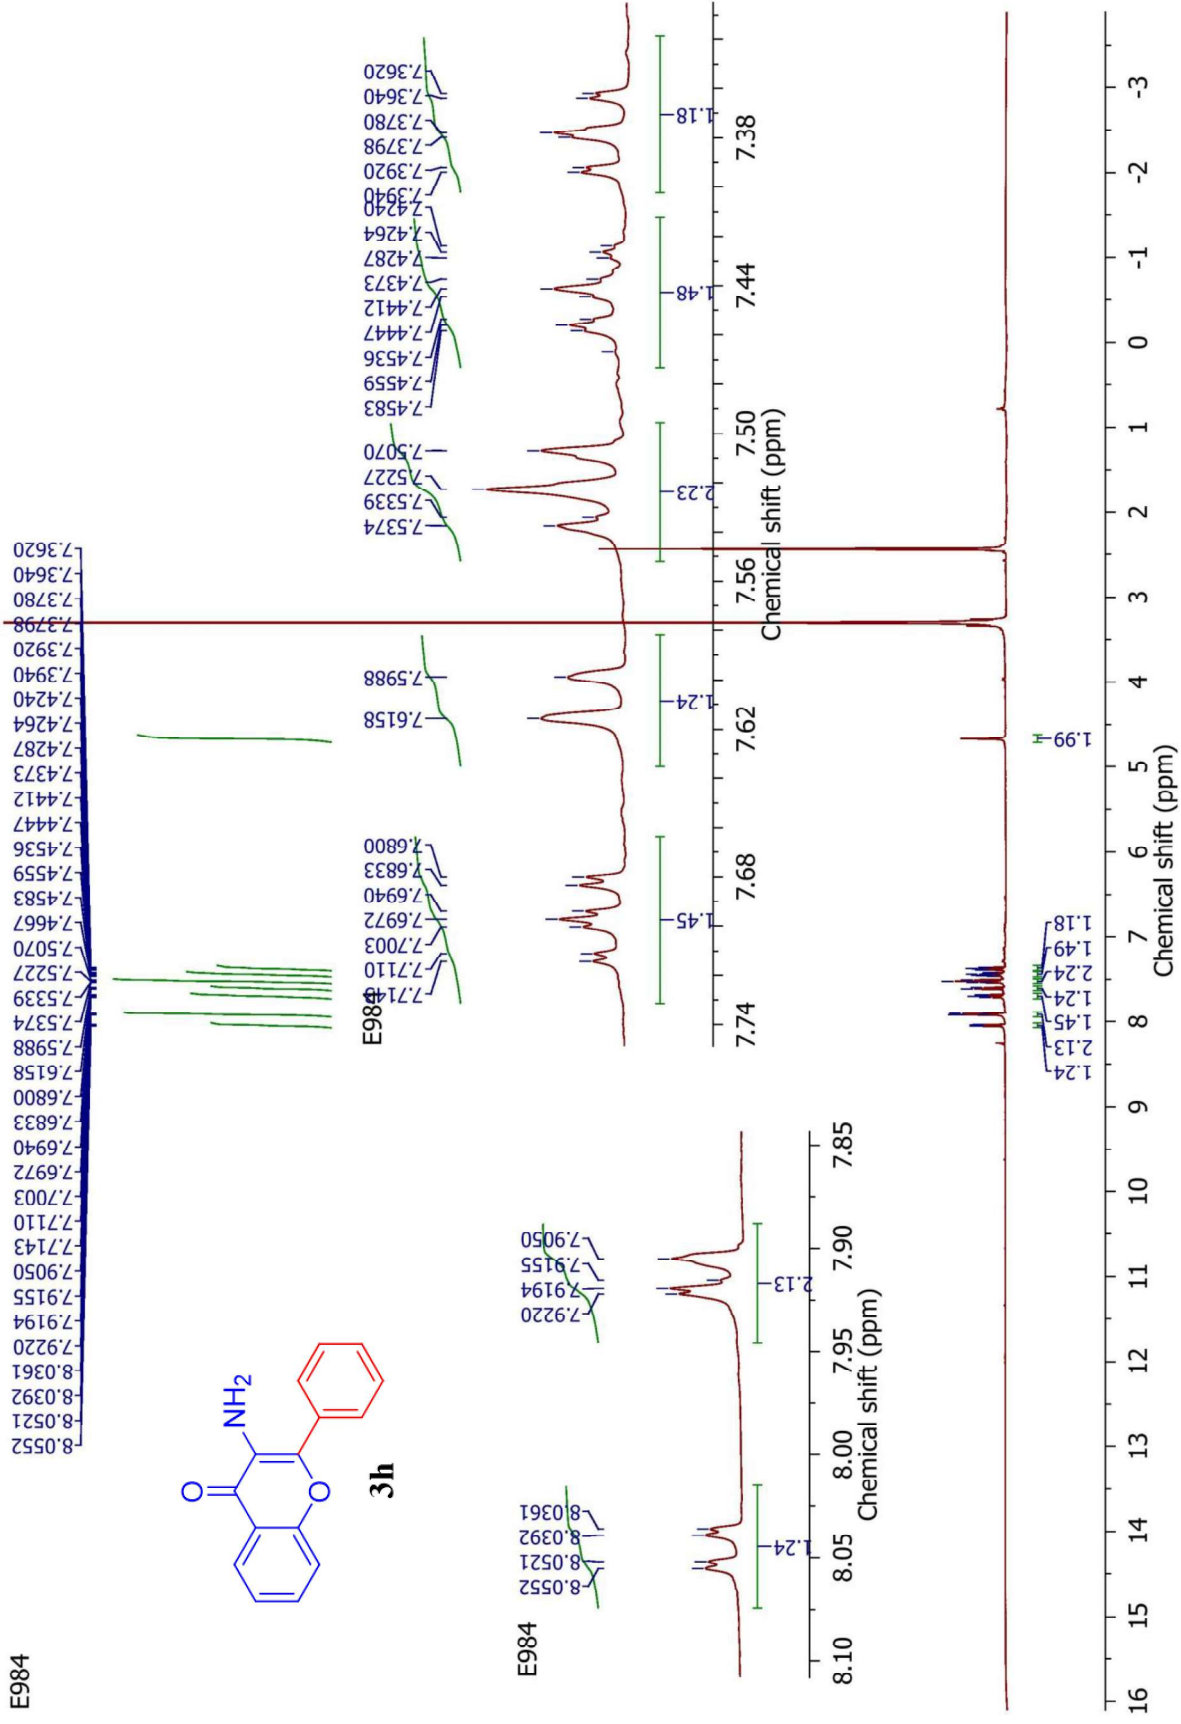

E984

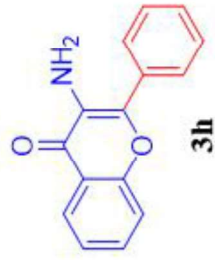

E984

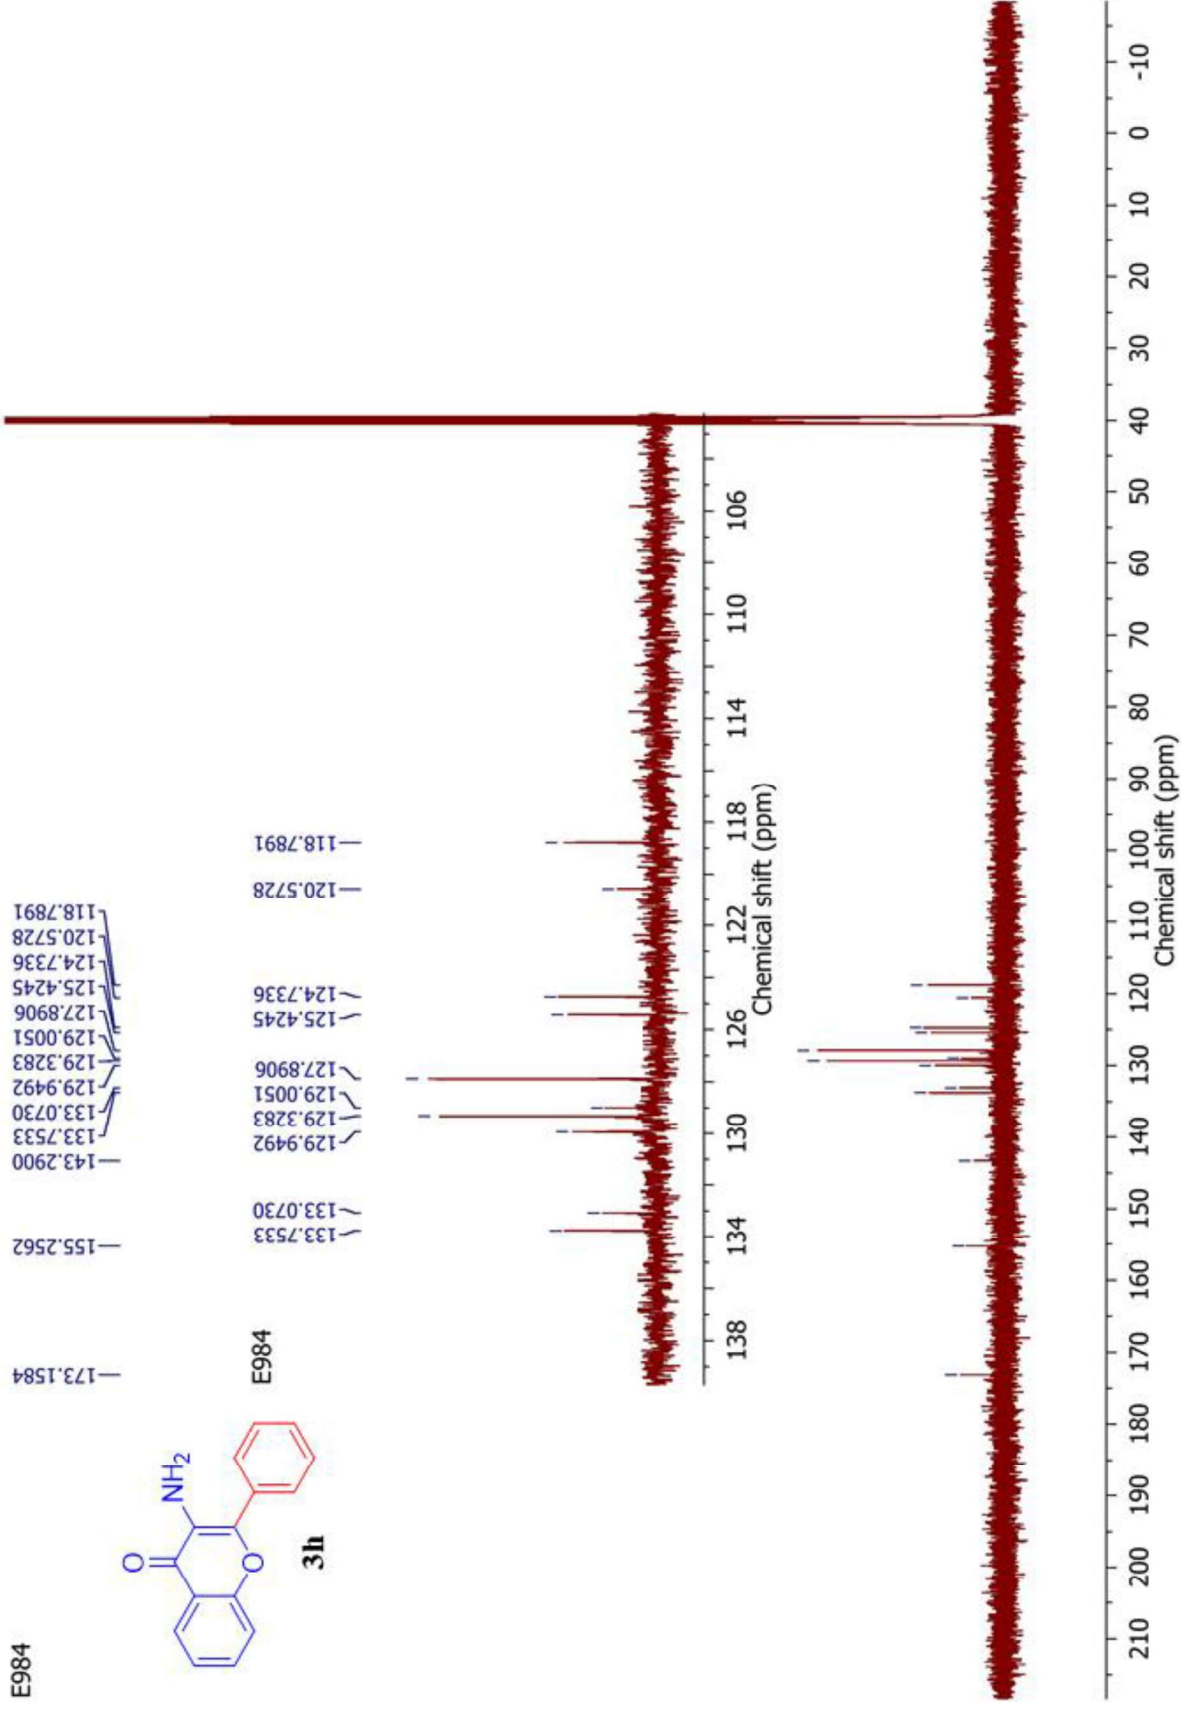

Sample Name: Seenivasan (1113)    Vial 39    Instrument Name: Instrument 1    User Name: Success  
Inj Vol: 1    InjPosition: Vial 39    SampleType: Sample    IRM Calibration Status: Success  
Data Filename: SVM-33.d    ACQ Method: ISOCRATIC.m    Comment:    Acquired Time: 12/6/2019 1:36:21 PM

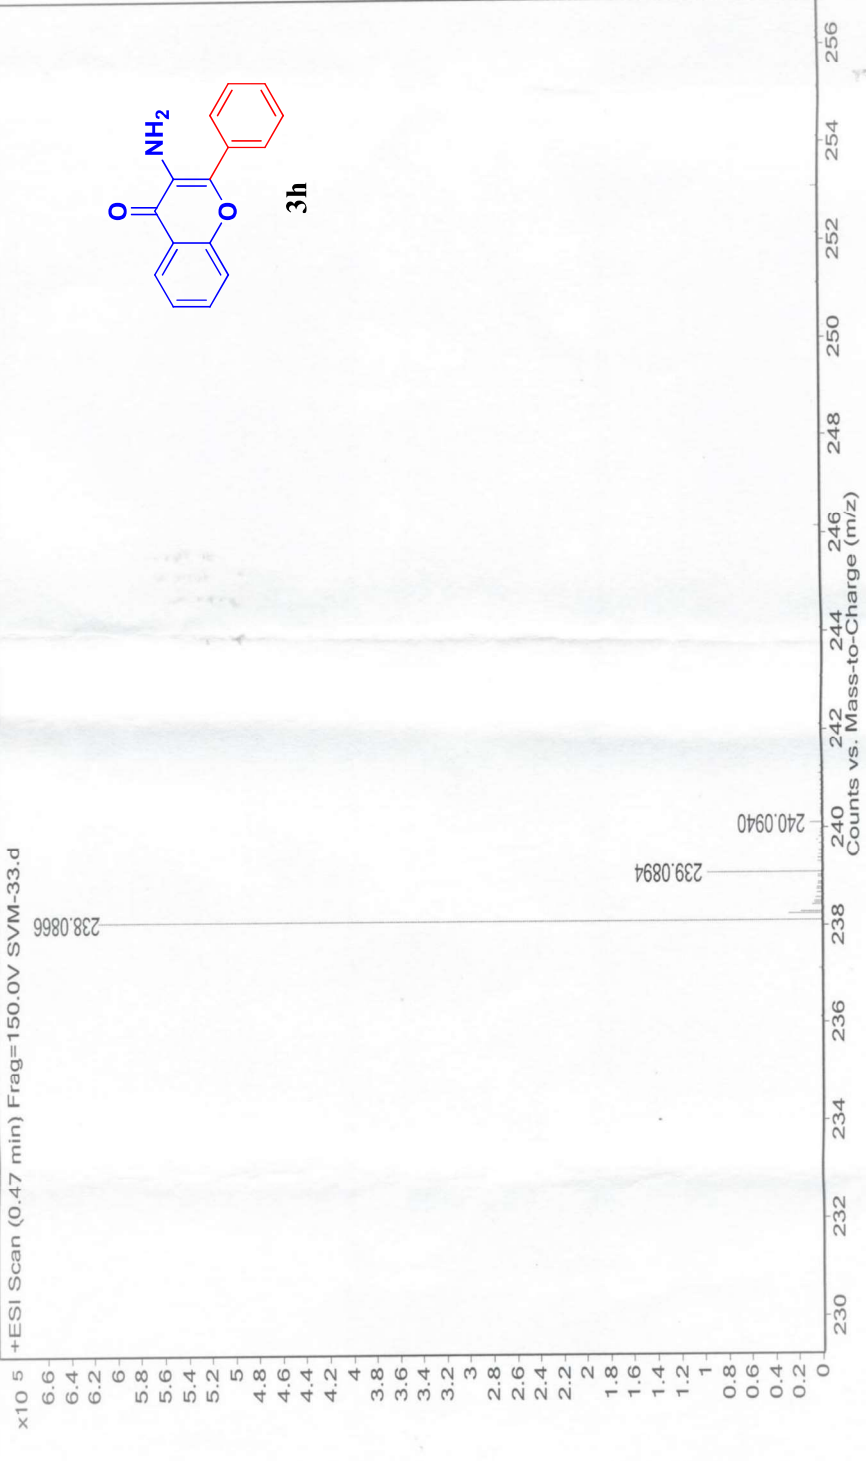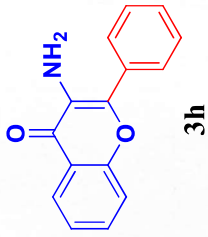

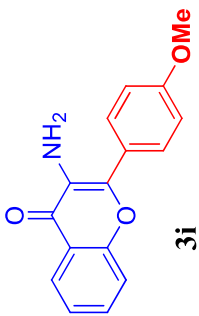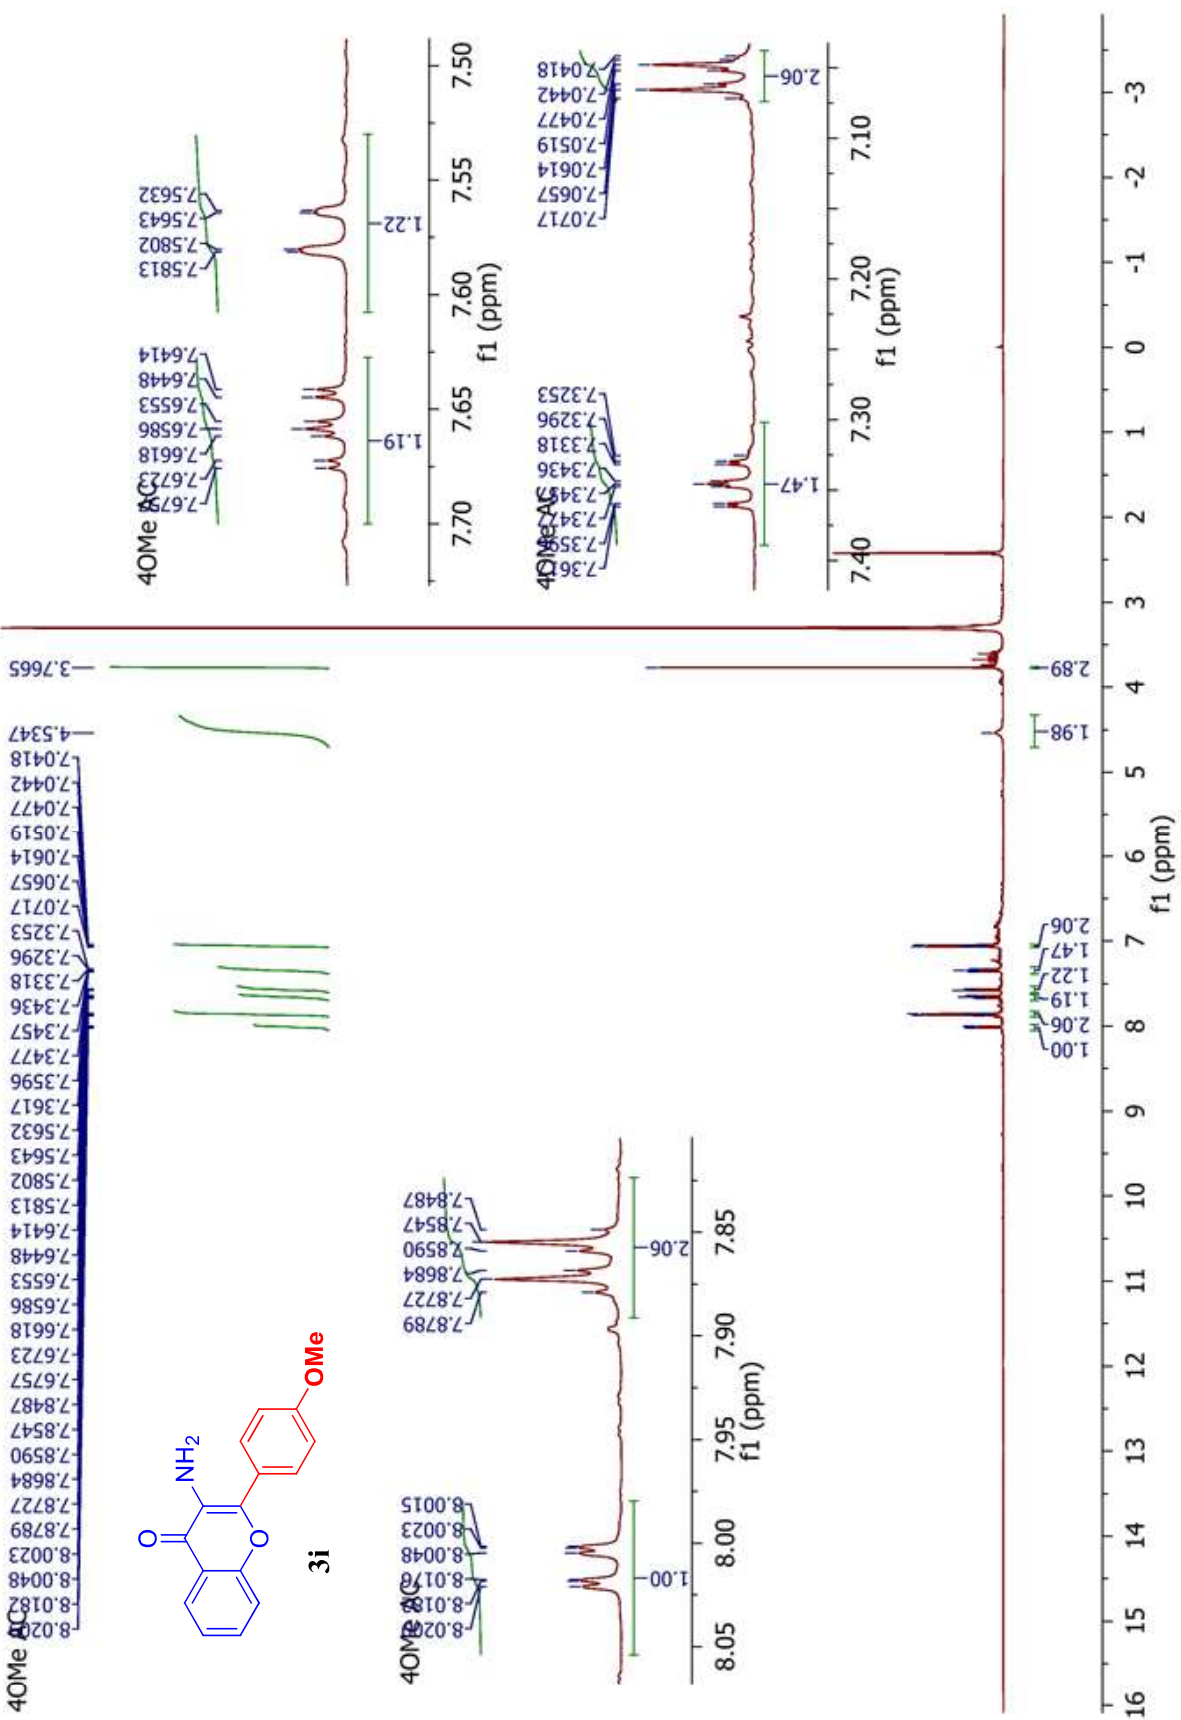



40Me AC

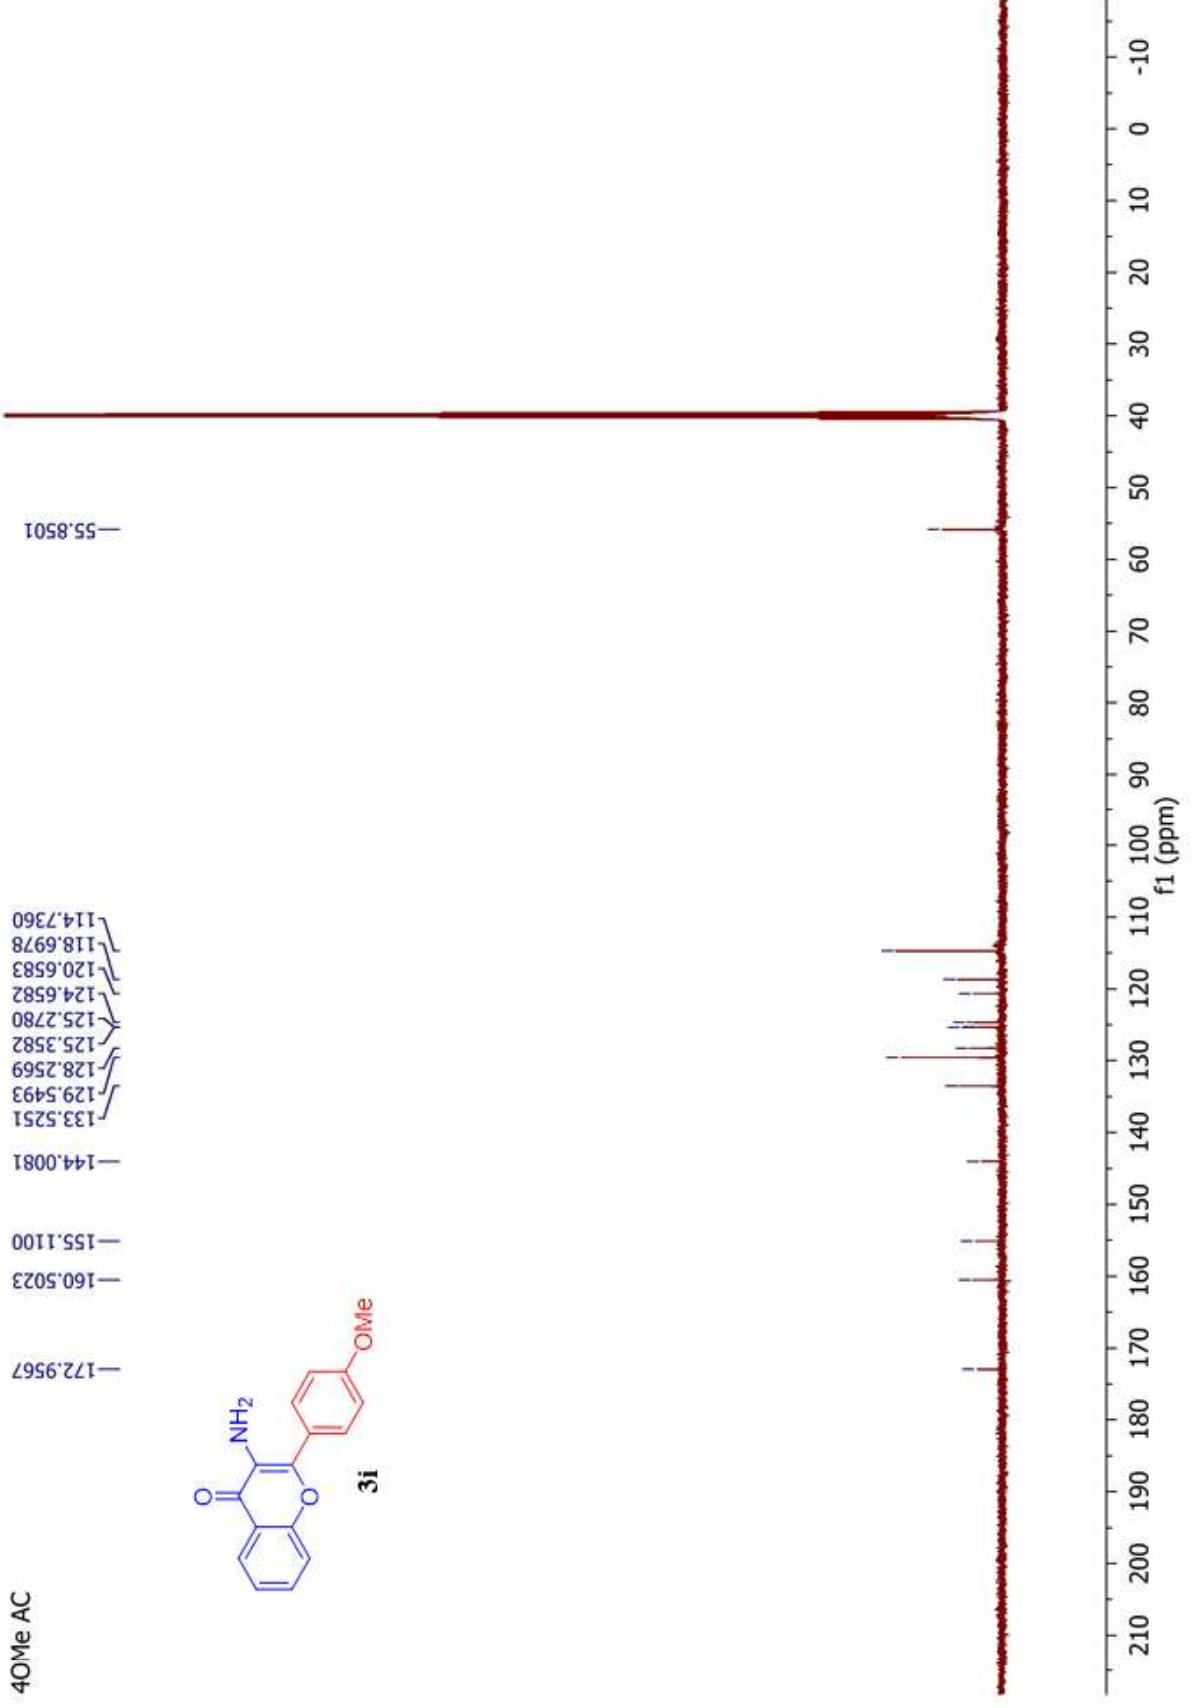

Sample Name Seenuvasan (1113) Position Vial 43 Instrument Name Instrument 1 User Name Success  
Inj Vol 1 InjPosition ISOCRATIC.m Sample Sample 12/6/2019 1:50:51 PM  
Data Filename SVM-36.d ACQ Method ISOCRATIC.m Comment Comment IRM Calibration Status  
+ESI Scan (0.77 min) Frag=150.0V SVM-36.d

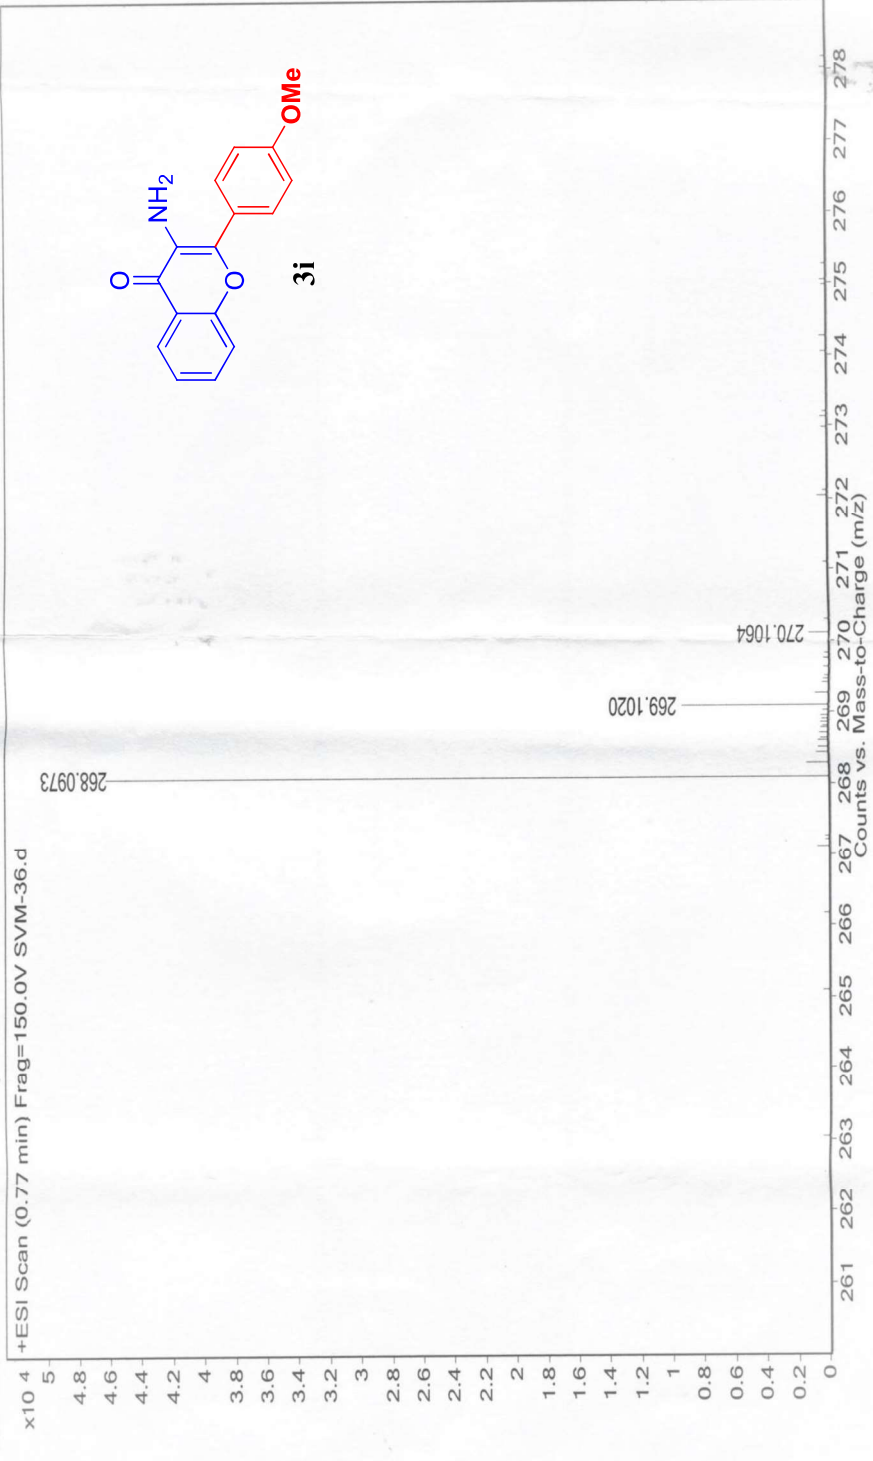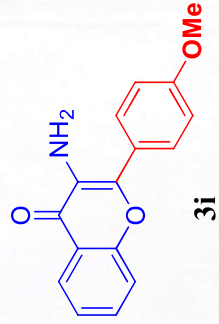

4Br AC

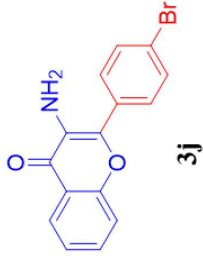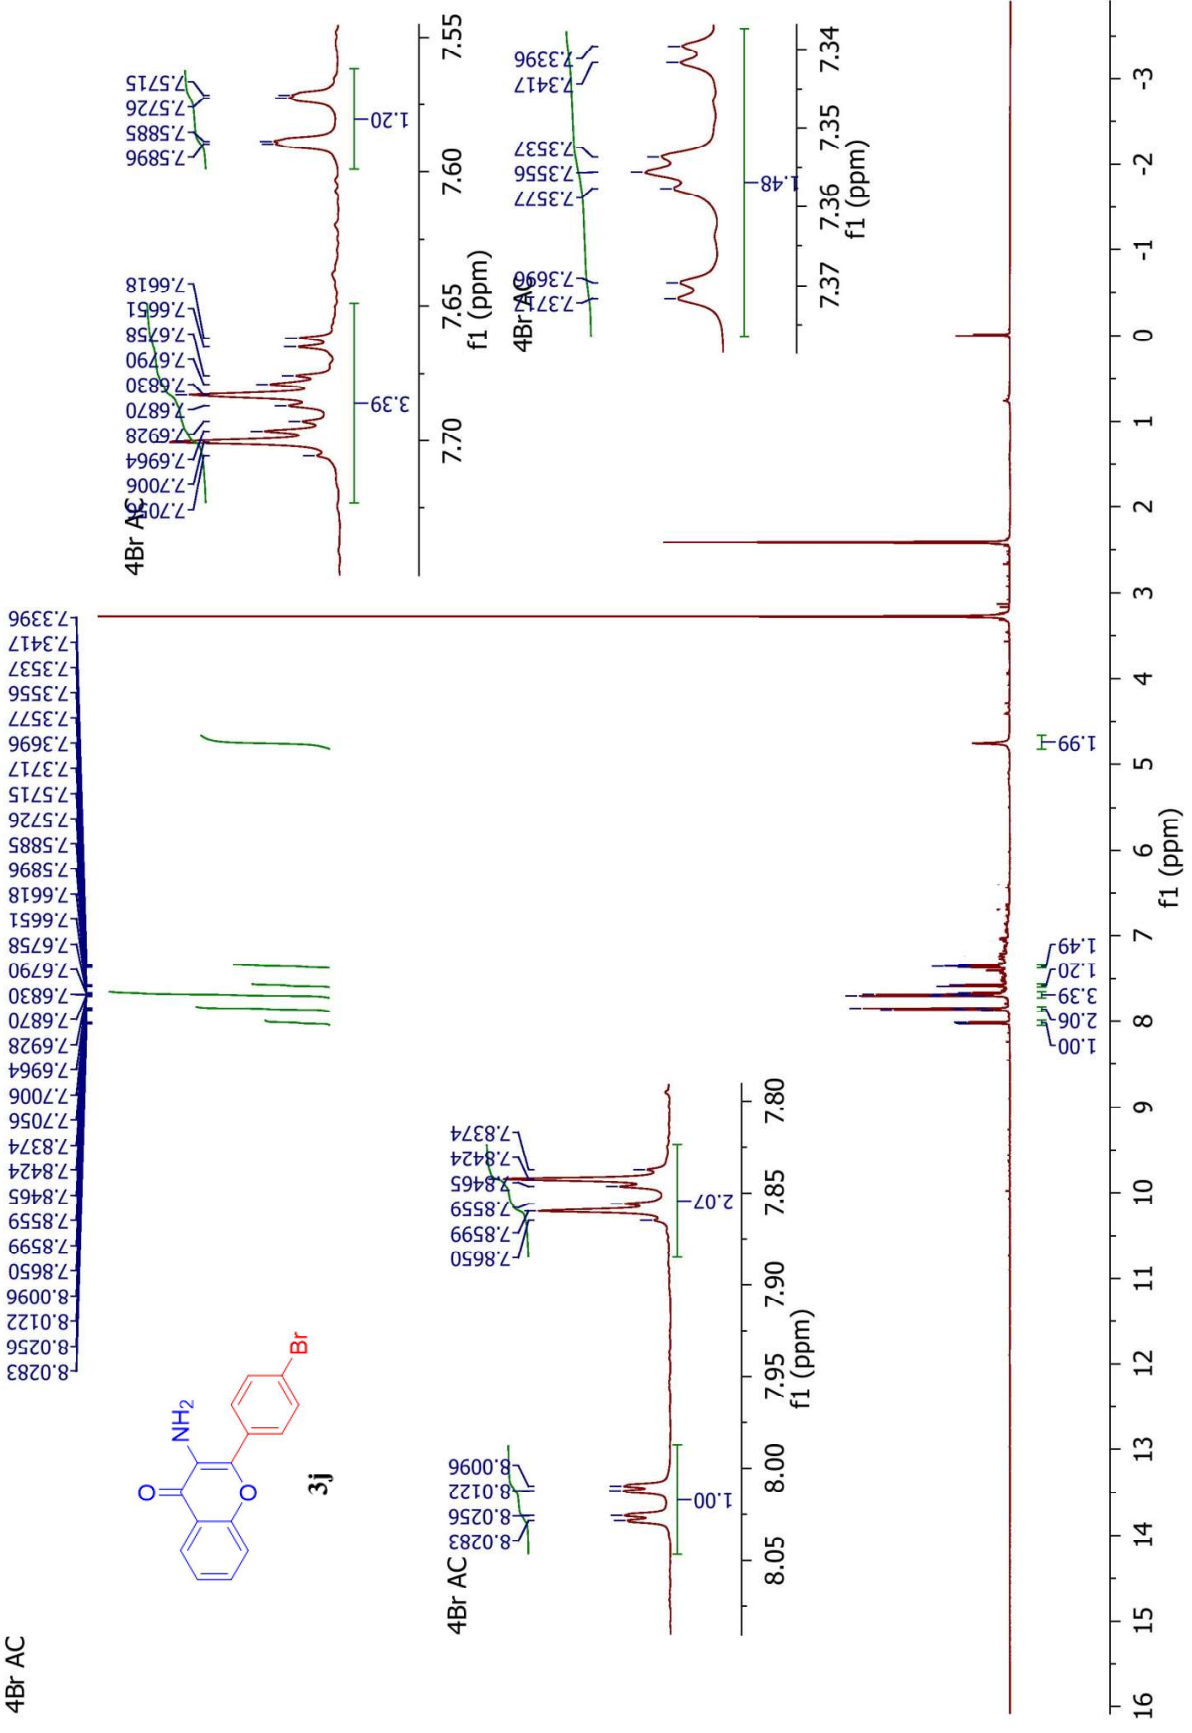

4Br AC

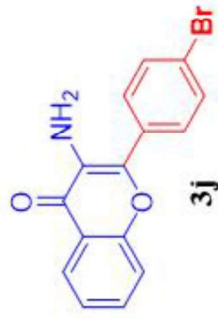

142.0671  
133.8691  
132.3216  
132.2607  
129.9113  
129.3315  
125.4486  
124.7819  
123.0753  
120.5069  
118.7827

155.2050

173.1937

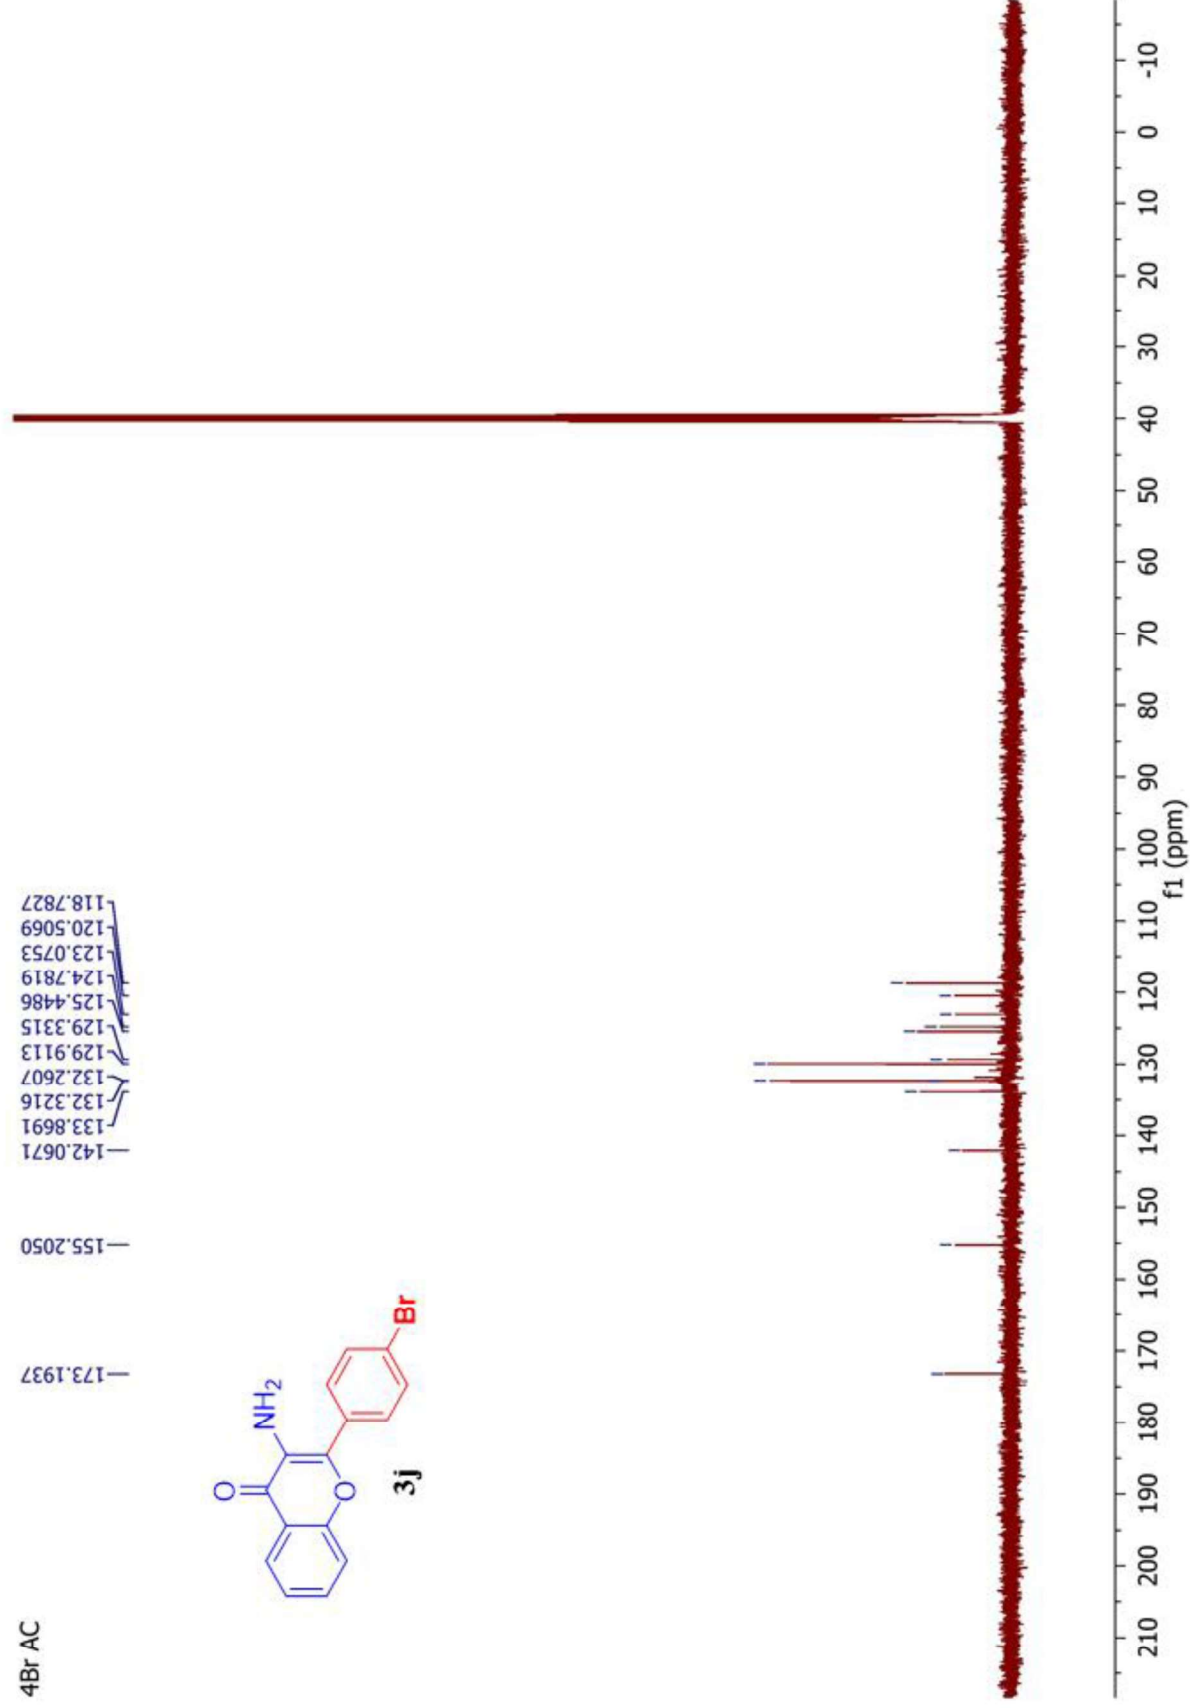

**Sample Name** Seenuvasan (1113) **Position** Vial 42 **User Name** Success  
**Inj Vol** 1 **InjPosition** ISOCRATIC.m **IRM Calibration Status** 12/6/2019 1:47:14 PM  
**Data Filename** SVM-35.d **ACQ Method** ISOCRATIC.m **SampleType** Sample **Acquired Time**

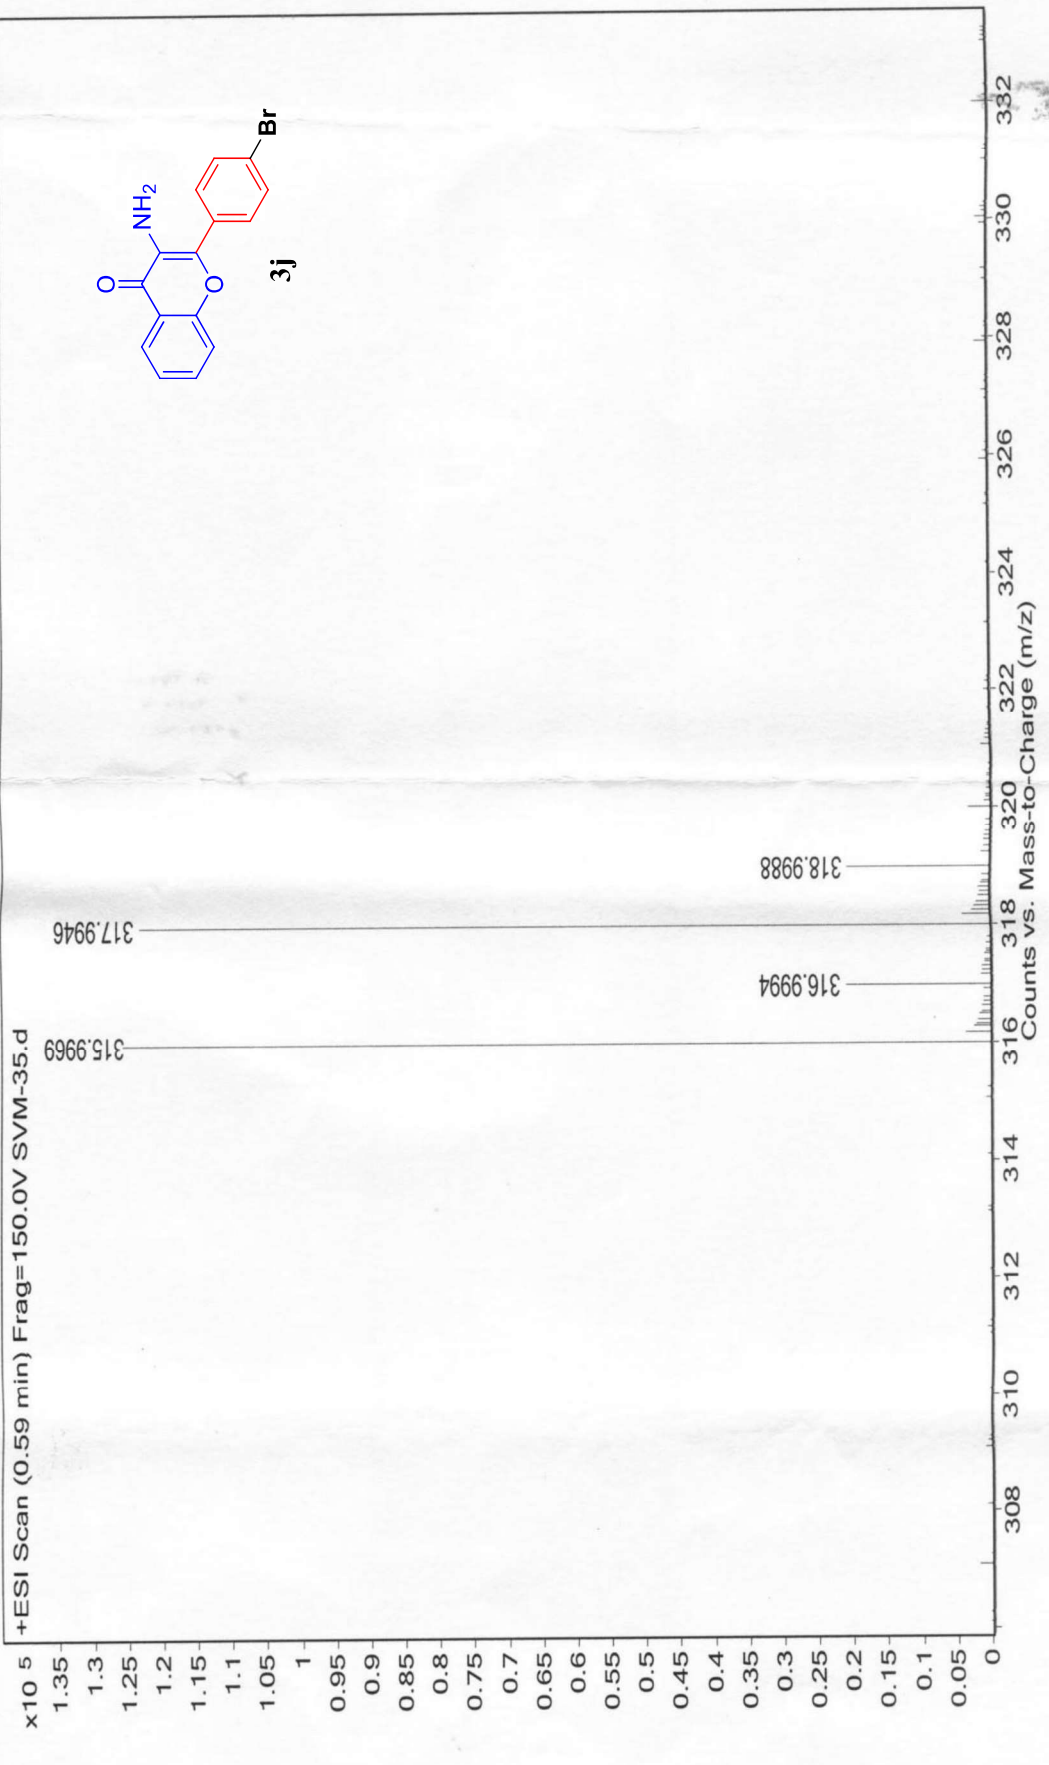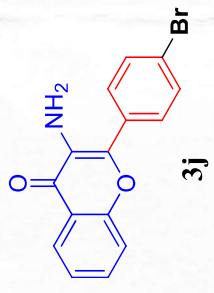

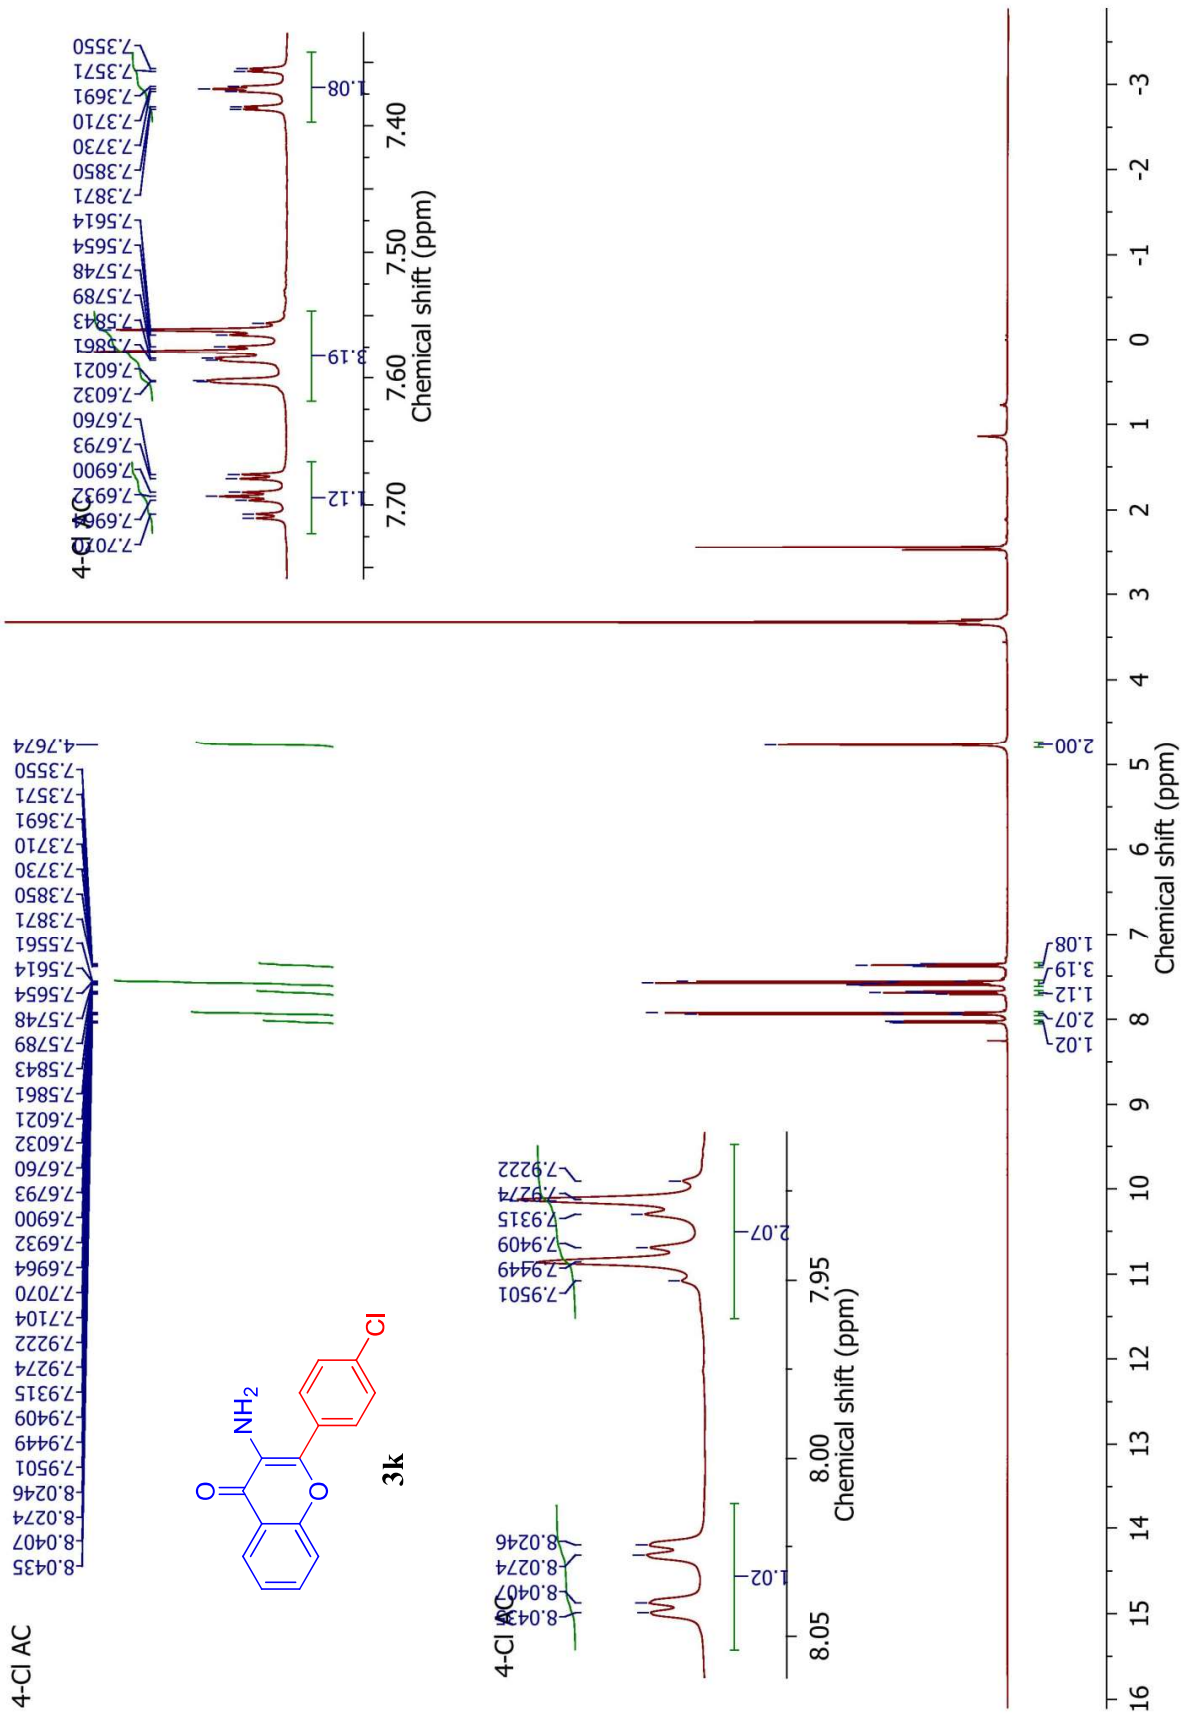



4Cl AC

—173.1940

—155.1950

—142.0583  
—134.3077  
—133.8476  
—131.9429  
—129.6979  
—129.3304  
—129.2932  
—125.4327  
—124.7688  
—120.4999  
—118.7611

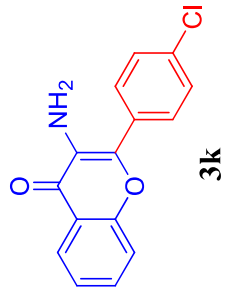

4Cl AC

—134.3077  
—133.8476  
—131.9429  
—129.6979  
—129.3304  
—129.2932  
—125.4327  
—124.7688  
—120.4999  
—118.7611

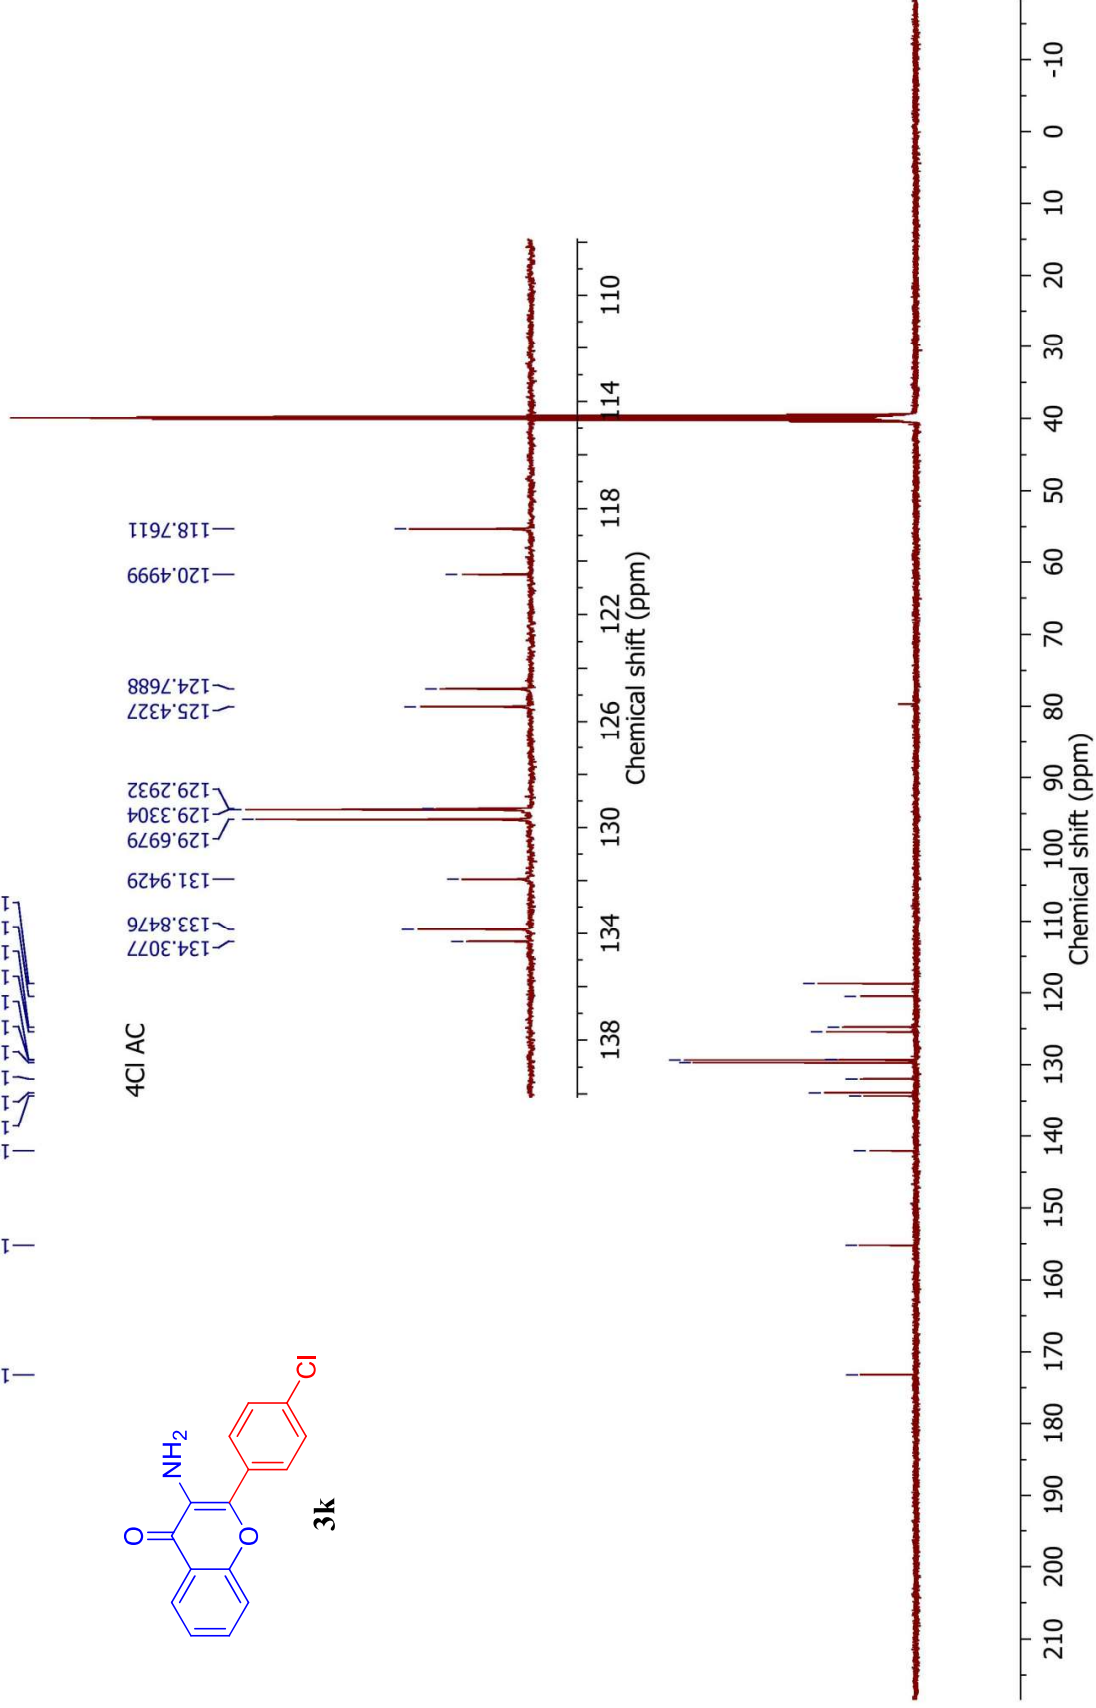

Sample Name Seenuvasan (1113) Position Vial 40 Instrument Name Instrument 1 User Name Success  
Inj Vol 1 InjPosition ACQ Method ISOCRATIC.m Sample Comment Sample 12/6/2019 1:40:06 PM  
Data Filename SVM-34.d +ESI Scan (0.55 min) Frag=150.0V SVM-34.d

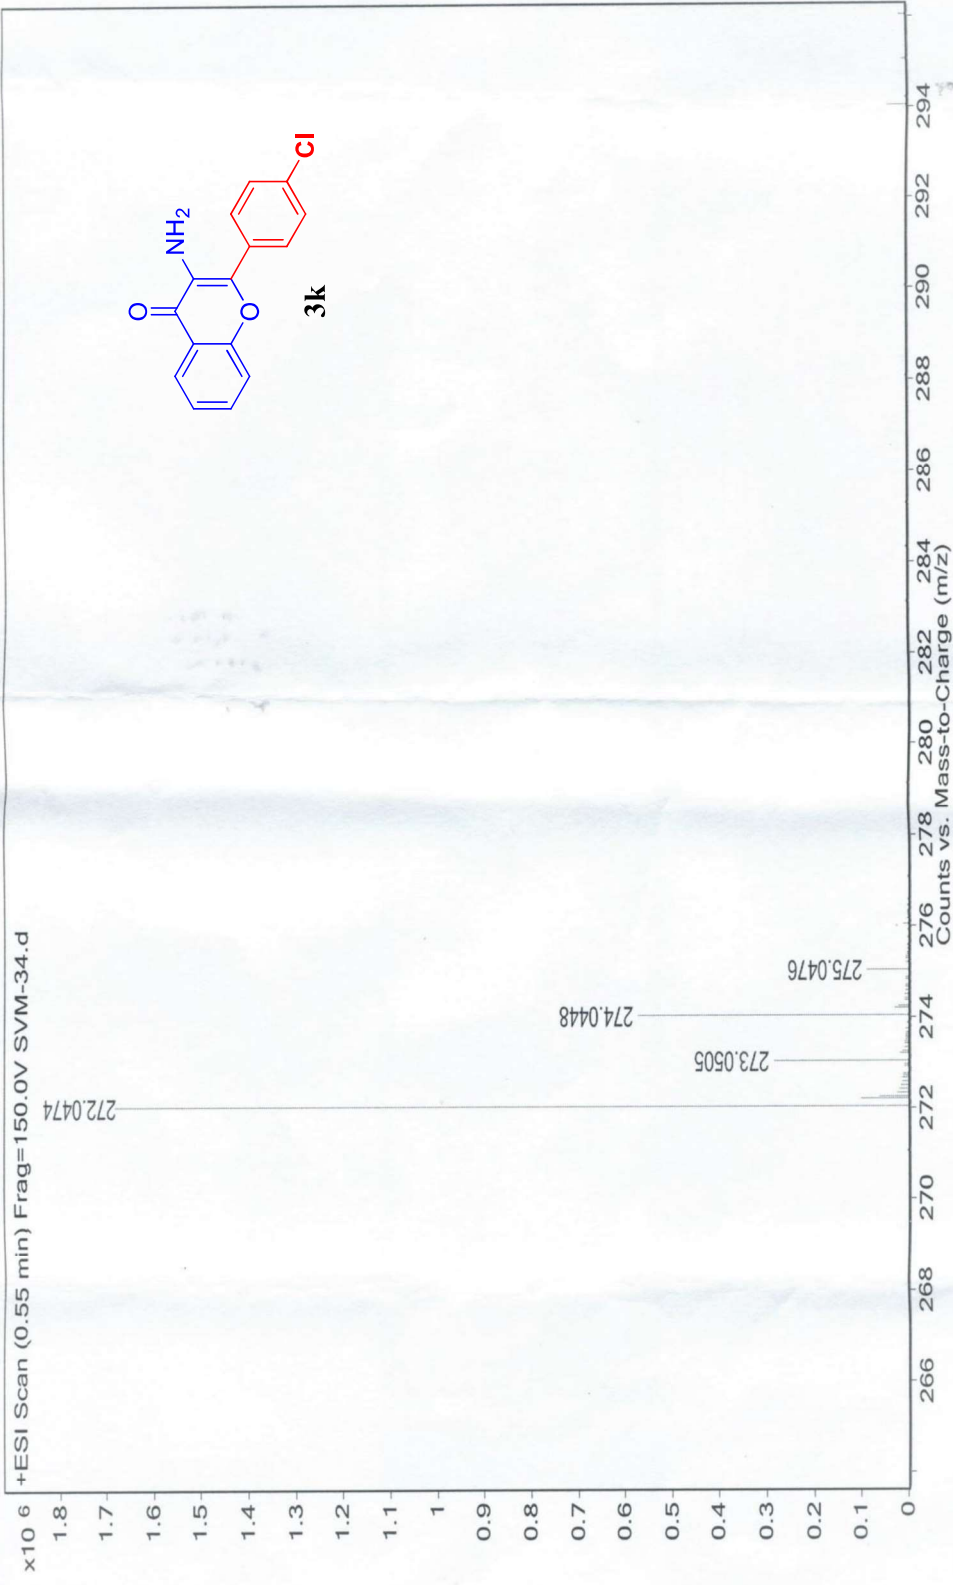

E844

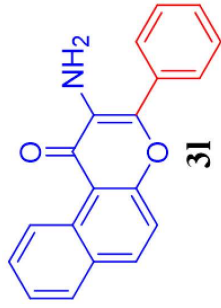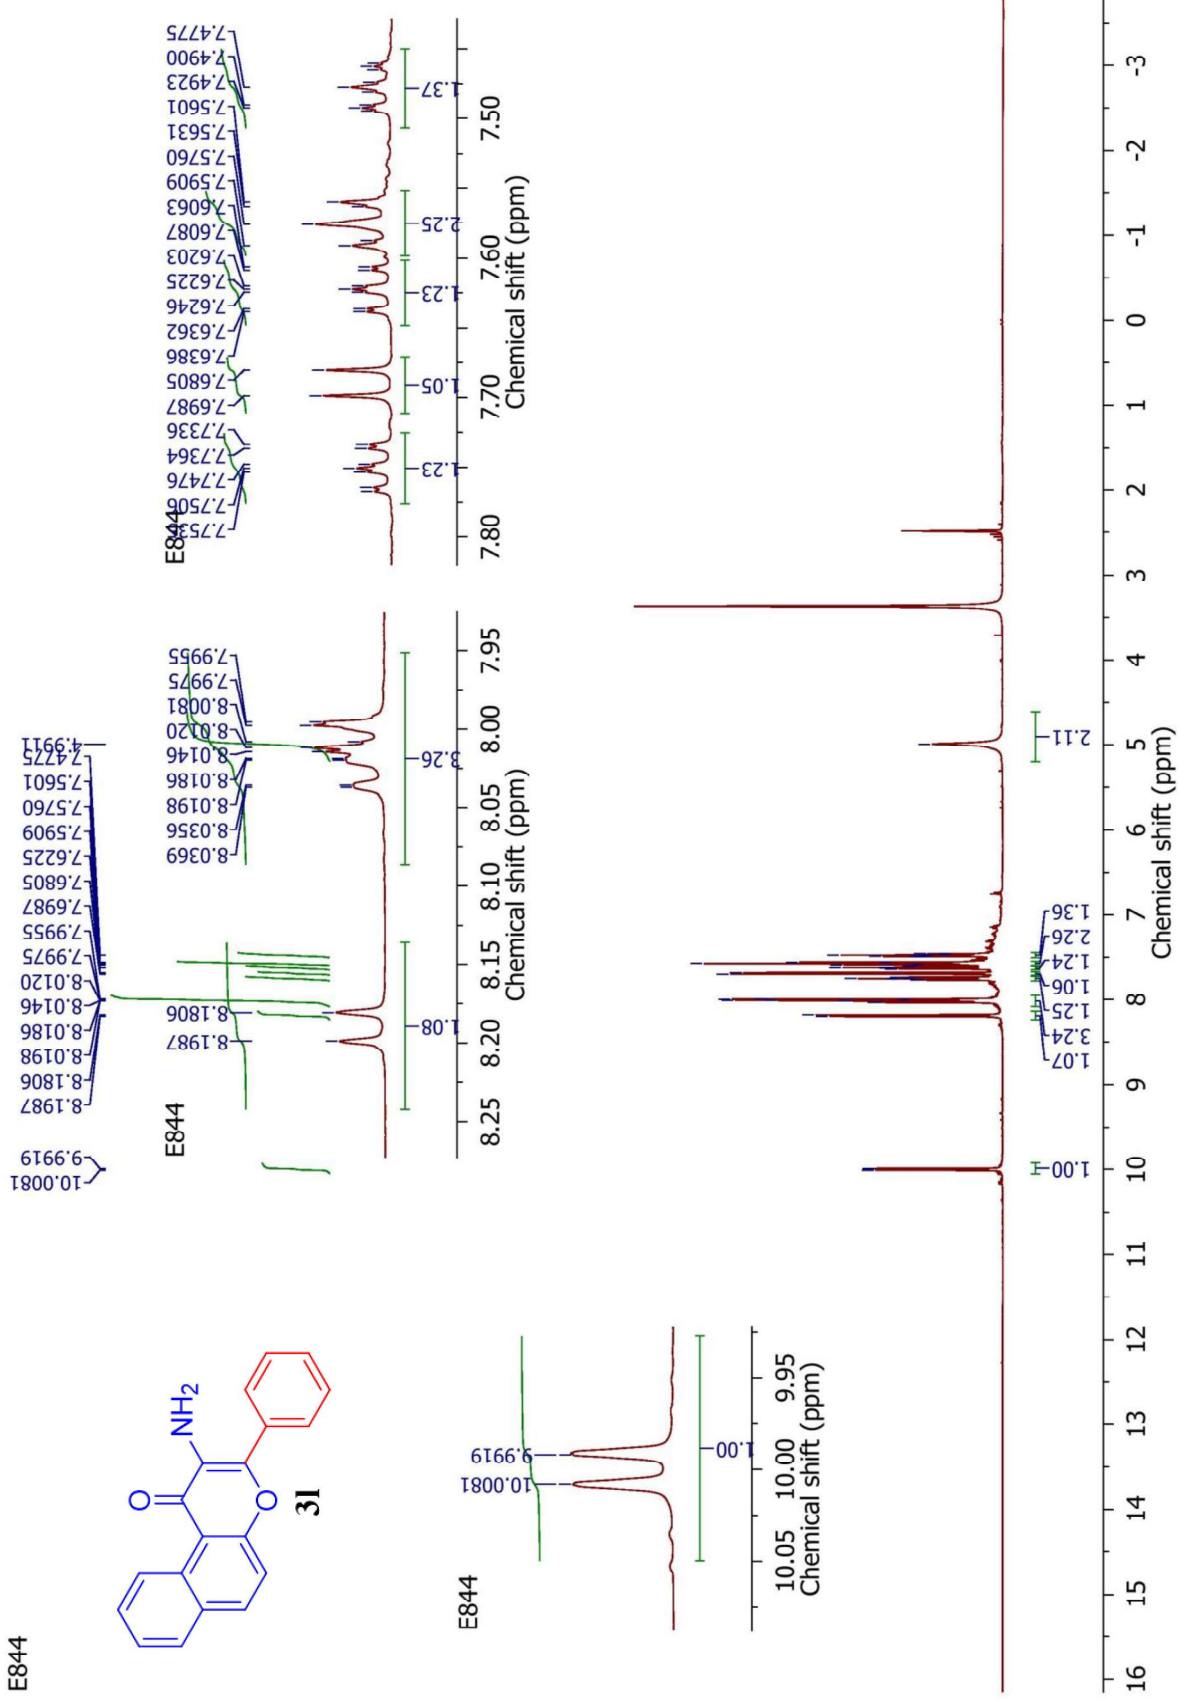

E844

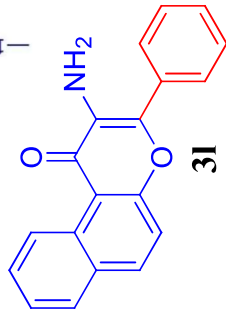

174.1728  
156.2676  
135.1716  
131.1571  
130.3111  
129.6940  
129.3390  
129.3165  
129.0393  
127.6273  
126.6812  
126.4914  
113.0098

E844  
140.9389  
135.1716  
132.9078  
131.1571  
130.4311  
130.3111  
129.6940  
129.3390  
129.3165  
129.0393  
127.6273  
126.6812  
126.4914  
118.7460  
113.0098

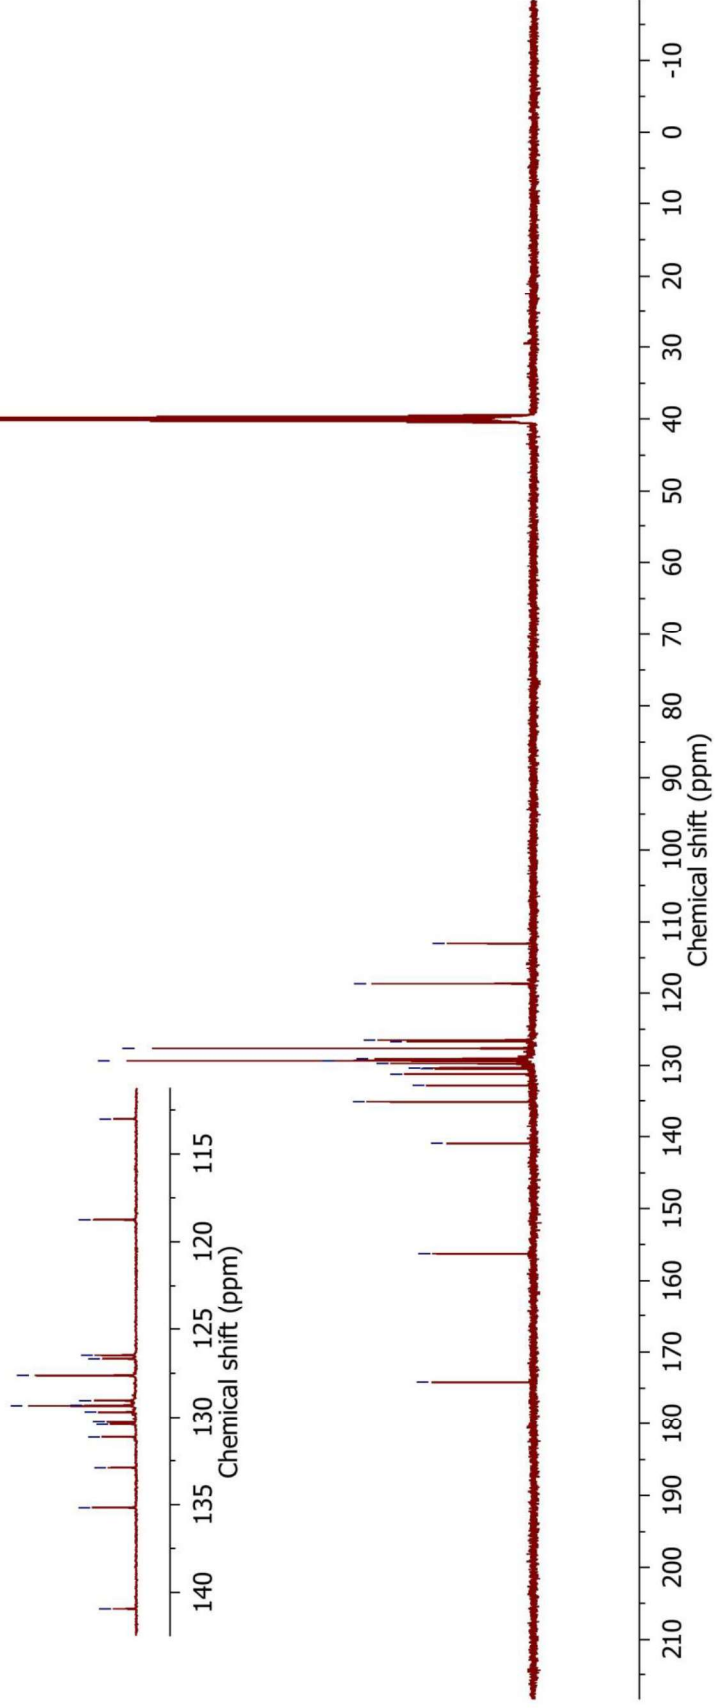

Sample Name Seenuvasan (1113) Position Vial 41 User Name Success  
Inj Vol 1 InjPosition ISOCRATIC.m Instrument 1 IRM Calibration Status 12/6/2019 1:43:41 PM  
Data Filename SVM-6.d SVM-6.d Comment Sample Acquired Time

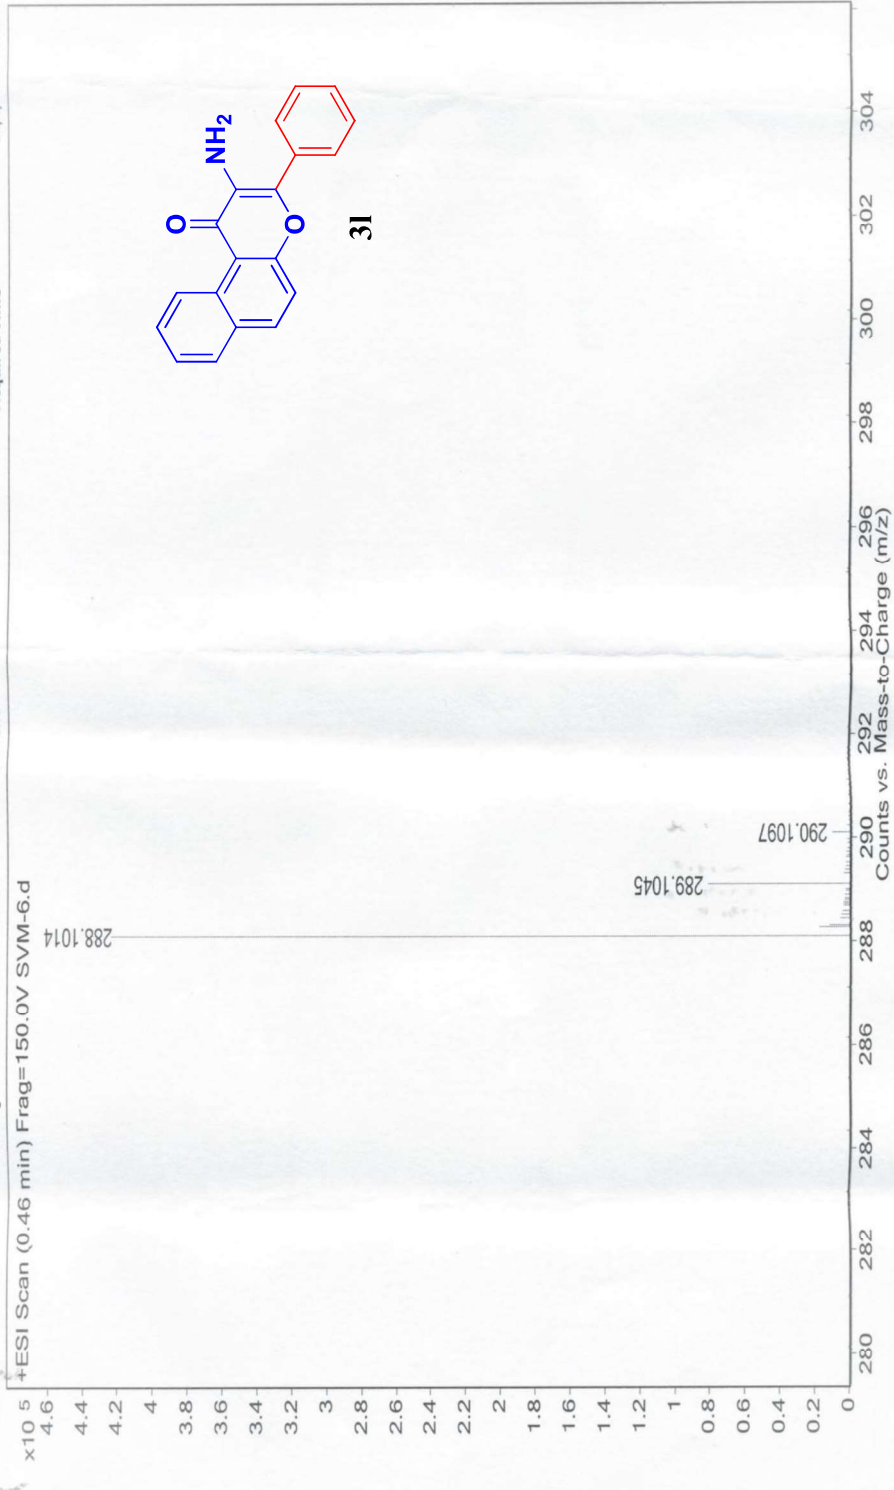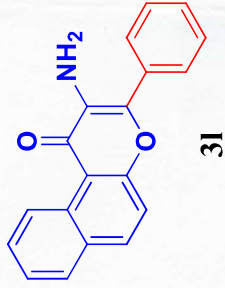

7E96

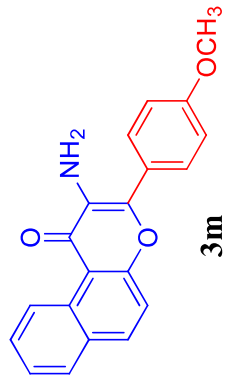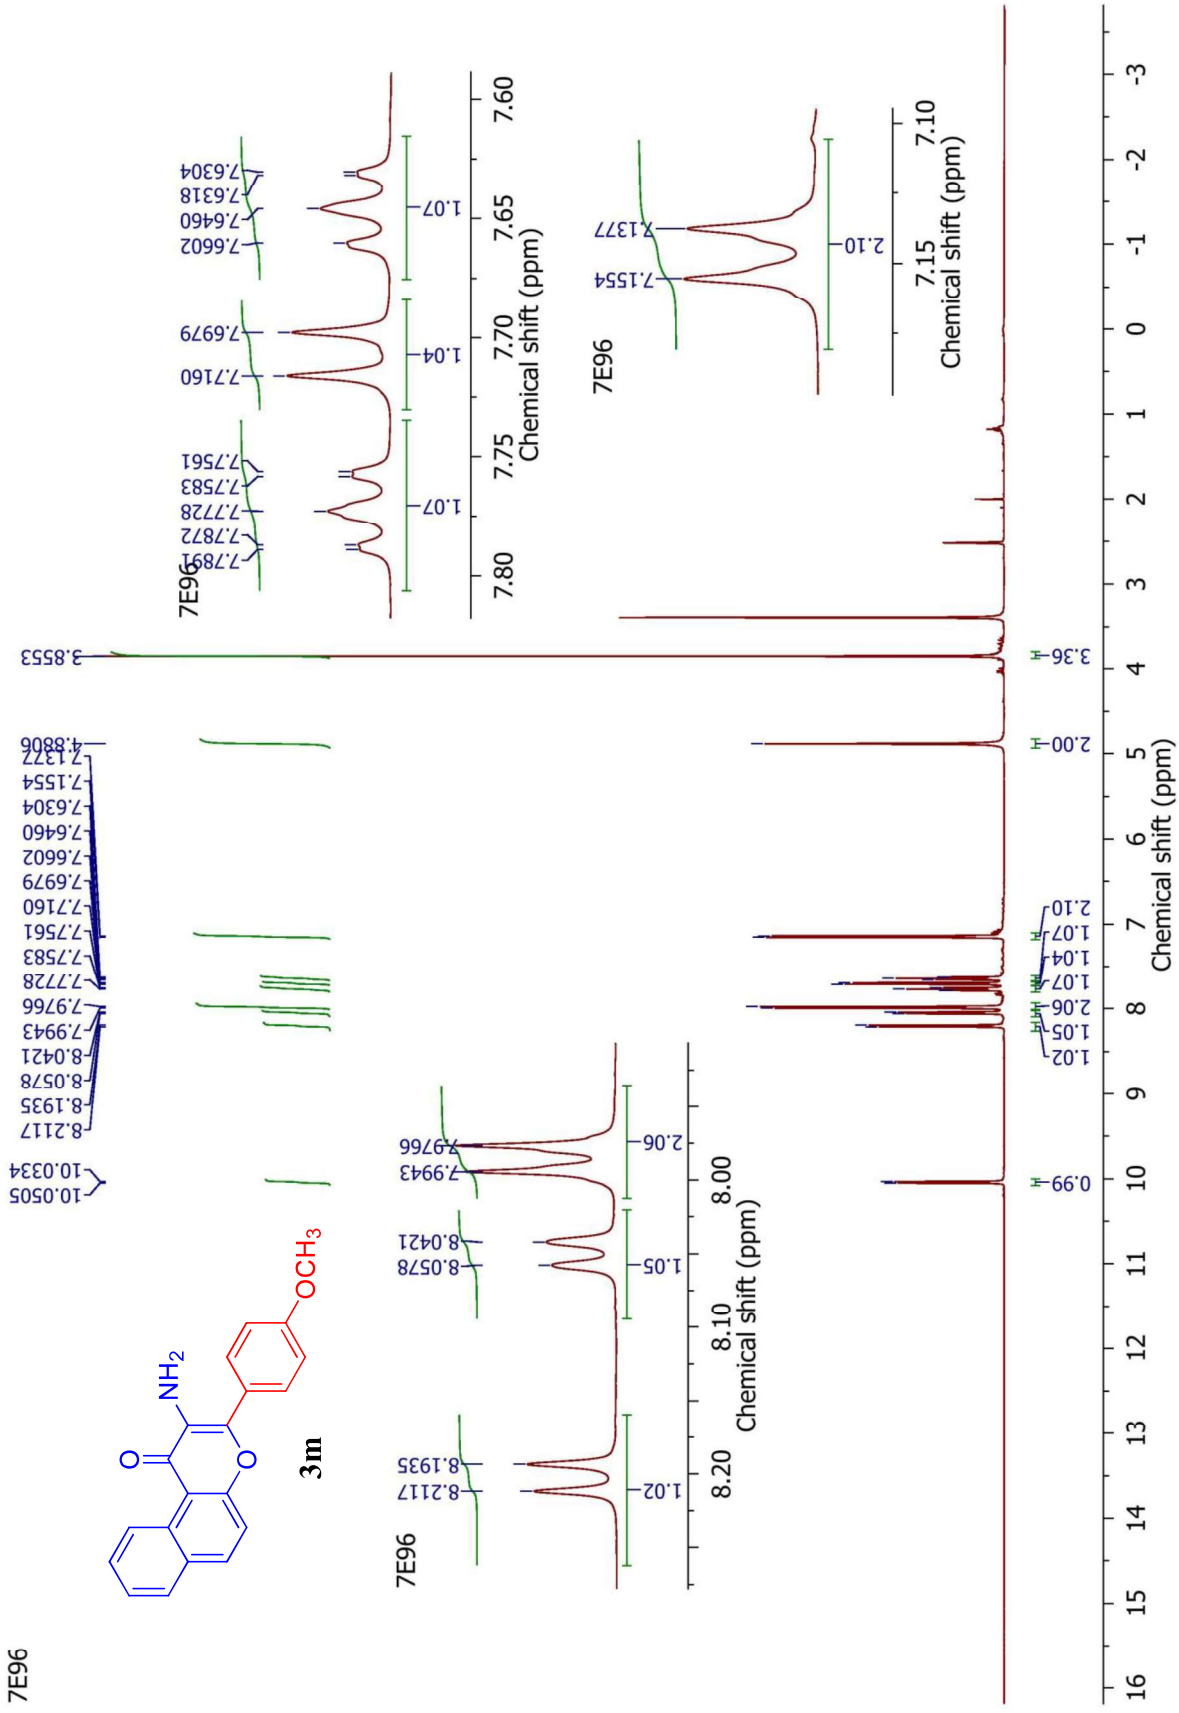



7E96

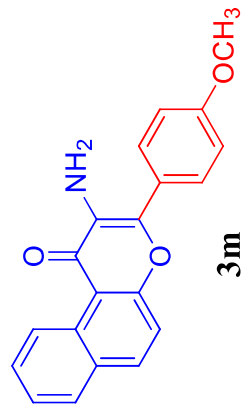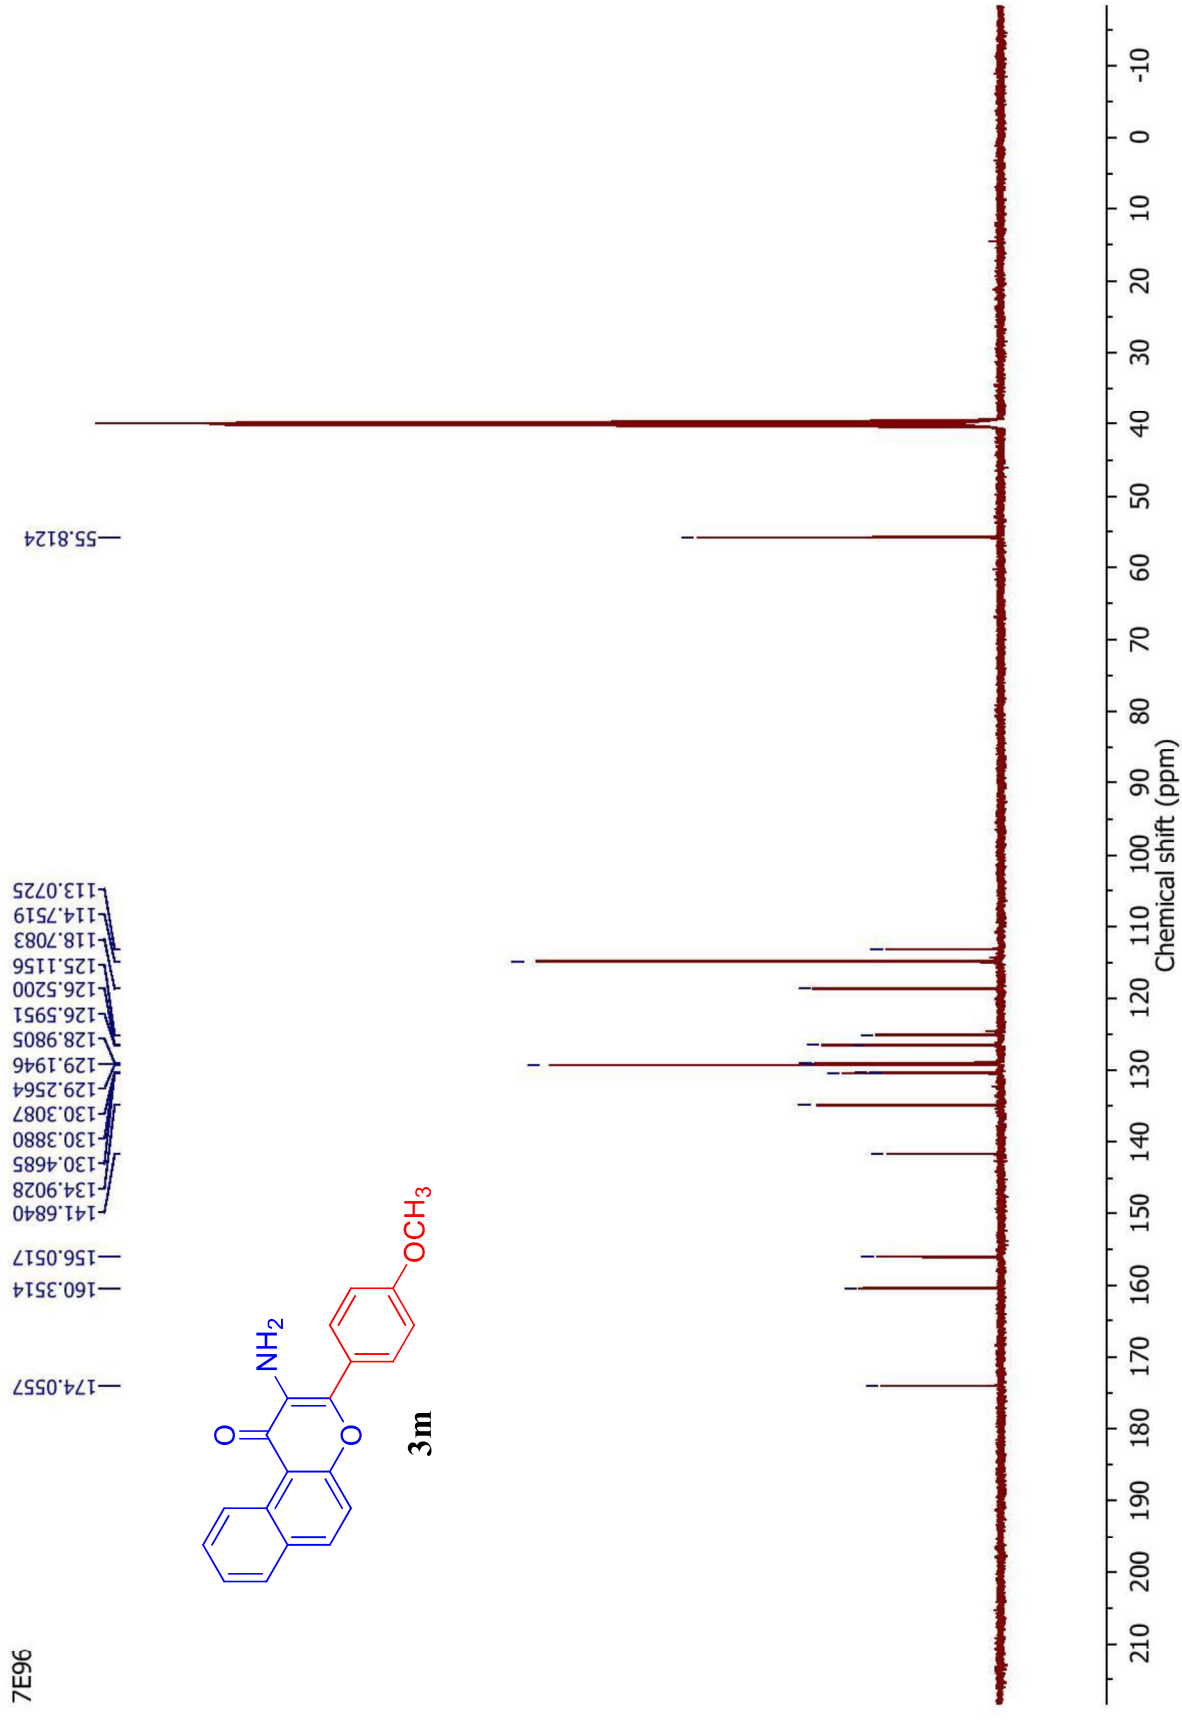

# Display Report

**Analysis Info**  
Analysis Name D:\Data\User Data\Dr. Jerome\MNTE96.d  
Method Tune\_pos\_Standard.m  
Sample Name MEOH  
Comment  
Acquisition Date 7/24/2019 2:40:44 PM  
Operator HRMS  
Instrument maxis impact 1819696.00160

**Acquisition Parameter**  
Source Type ESI  
Polarity Positive  
Scan Range 50 m/z  
Scan End 3000 m/z  
Ion Polarity Positive  
Set Corona 4500 V  
Set End Plate Offset -500 V  
Set Charging Voltage 2000 V  
Set Corona 0 nA  
Set Nebuliser 0.5 Bar  
Set Dry Gas 200 °C  
Set Divert Valve 4.0 l/min  
Set APCI Heater Source 0 °C

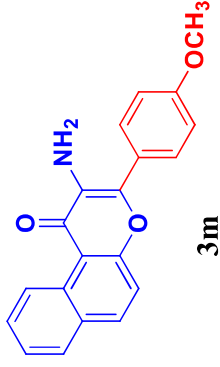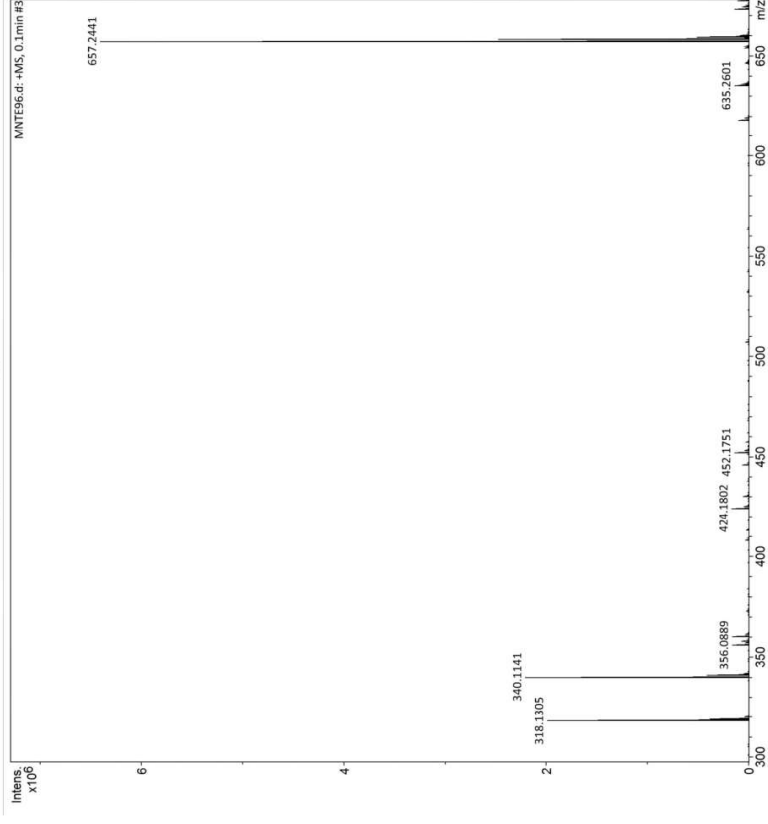

E910

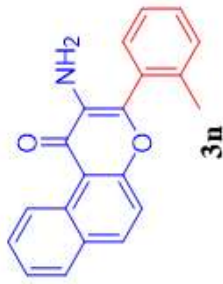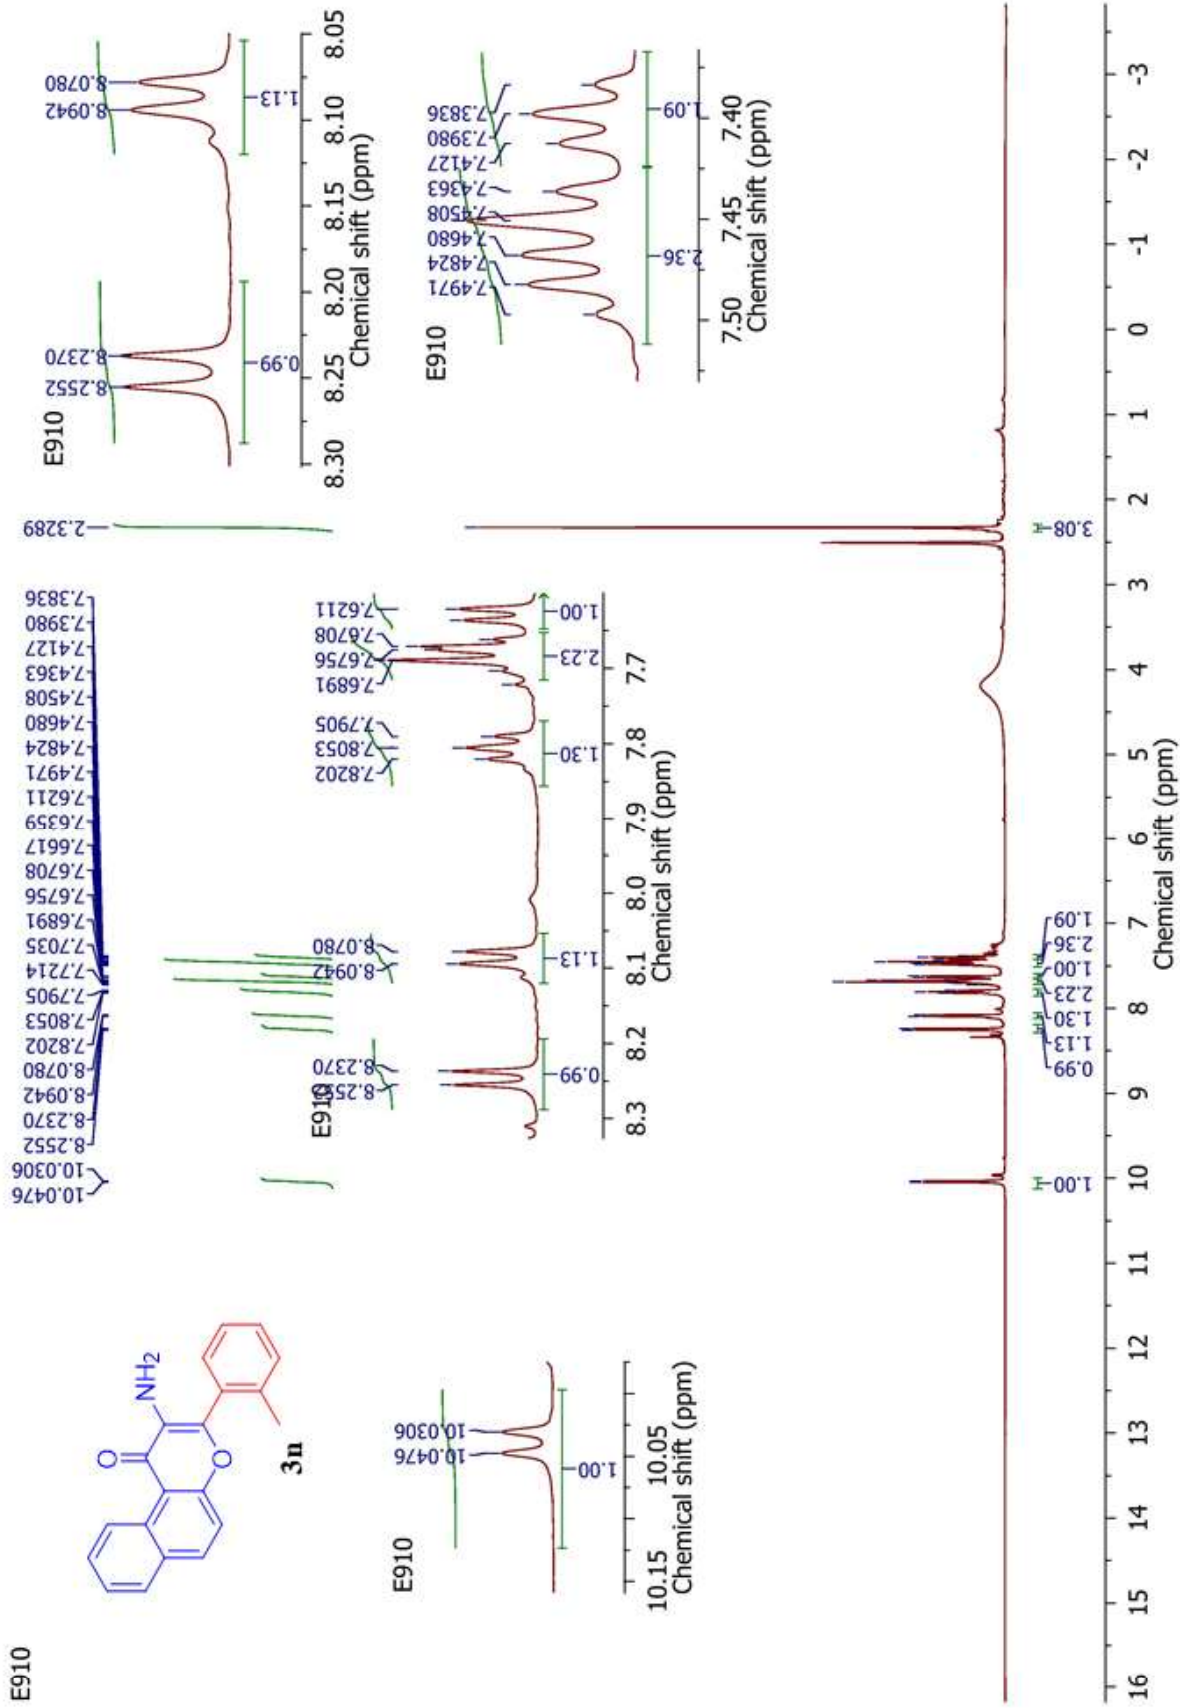

E910

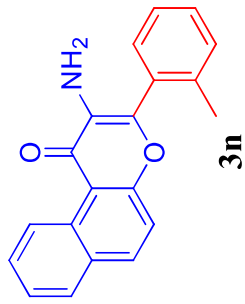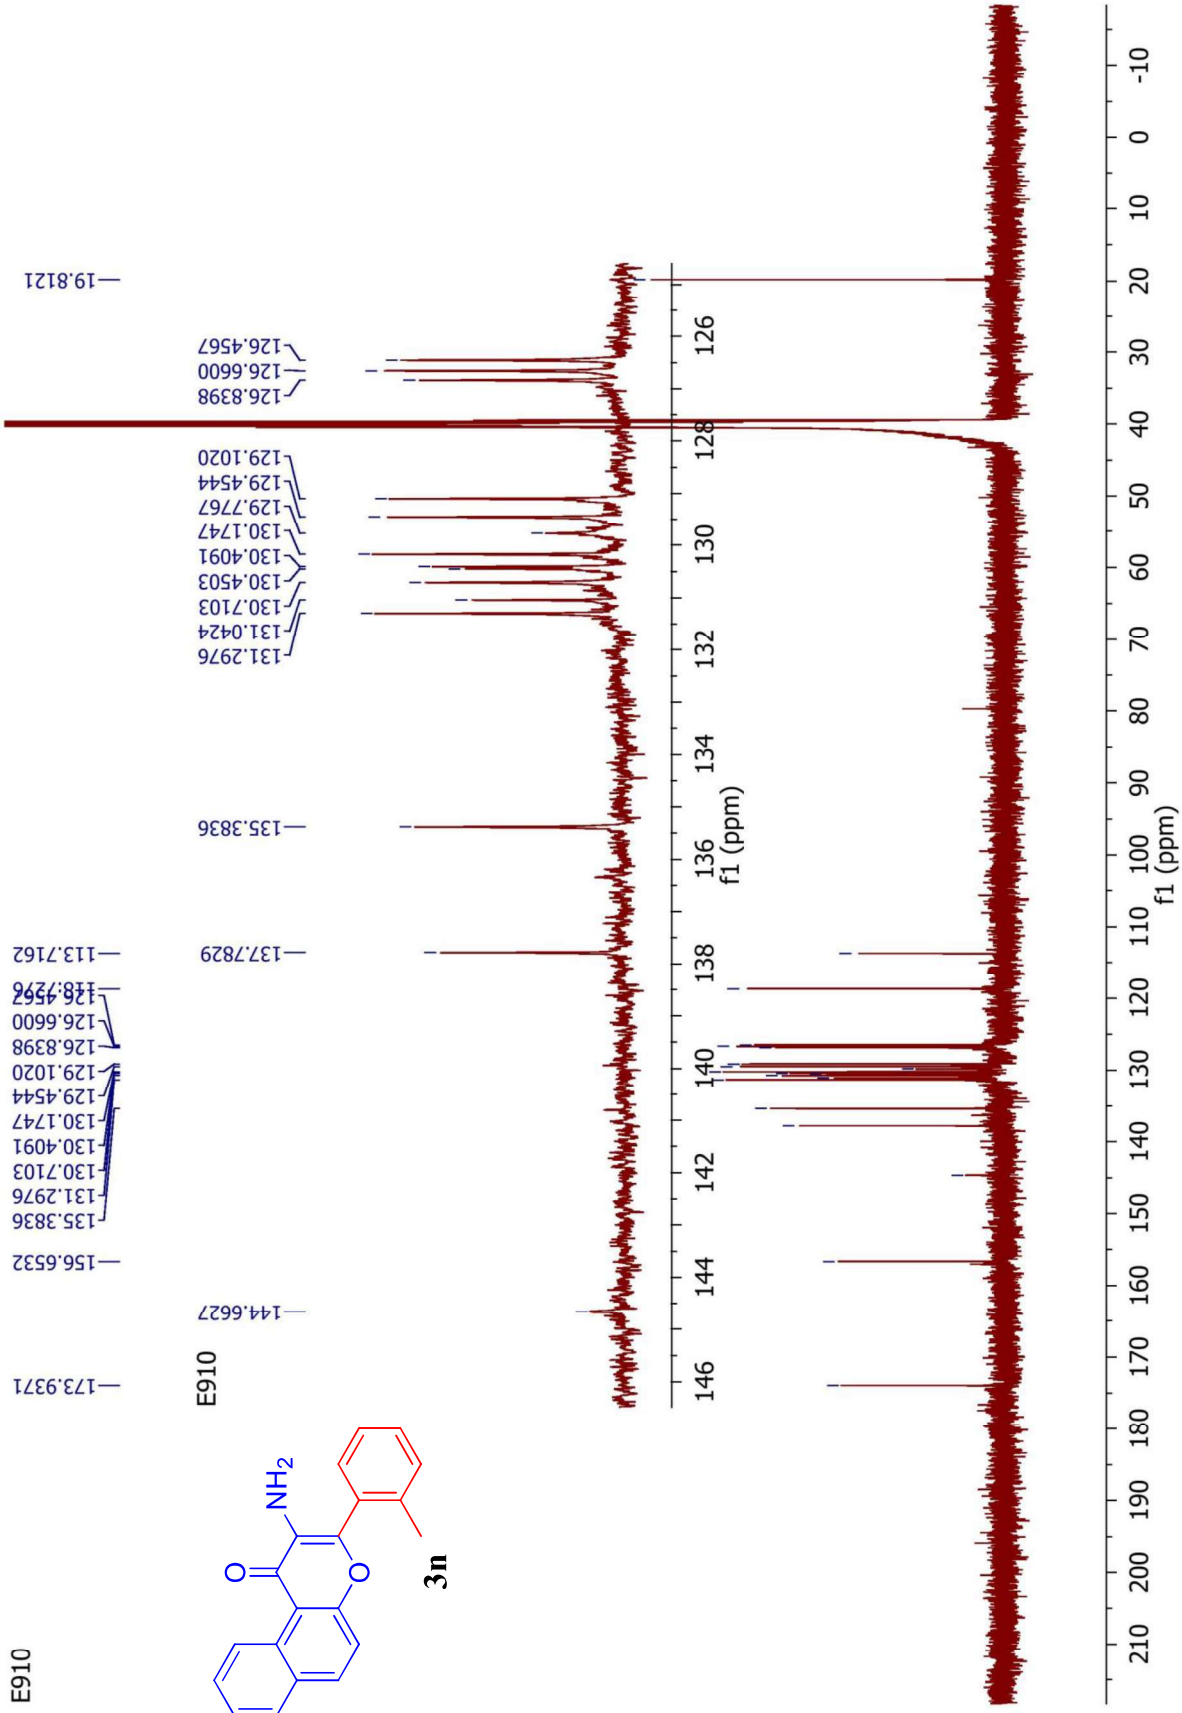

**Sample Name** Seenivasan (1113) **Position** Vial 33 **User Name** Success  
**Inj Vol** 1 **InjPosition** **Instrument 1** Instrument 1  
**Data Filename** SVM-27.d **ACQ Method** ISOCRATIC.m **SampleType** Sample **IRM Calibration Status** Acquired Time  
 12/6/2019 1:14:30 PM

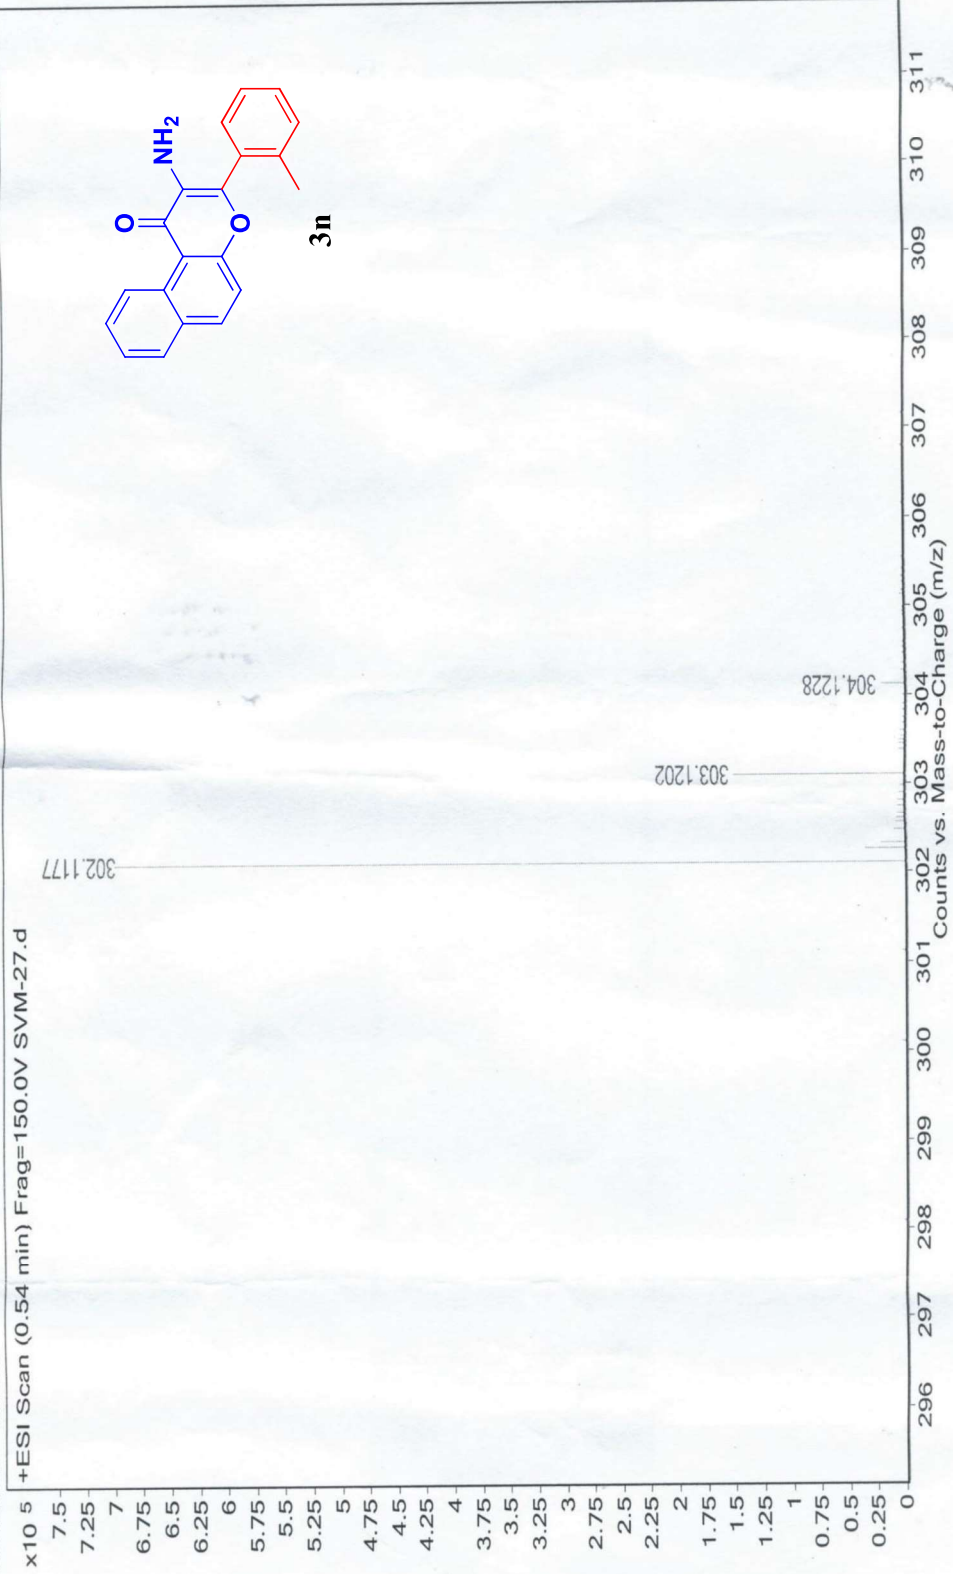

7E97

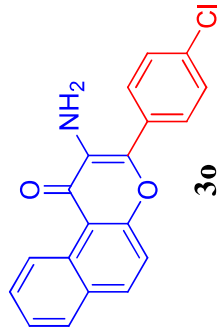

9.9795  
9.9625  
8.2089  
8.1907  
8.0391  
8.0283  
8.0246  
8.0111  
7.7512  
7.7368  
7.7345  
7.6984  
7.6802  
7.6424  
7.6408  
7.6276  
5.0688

7E97

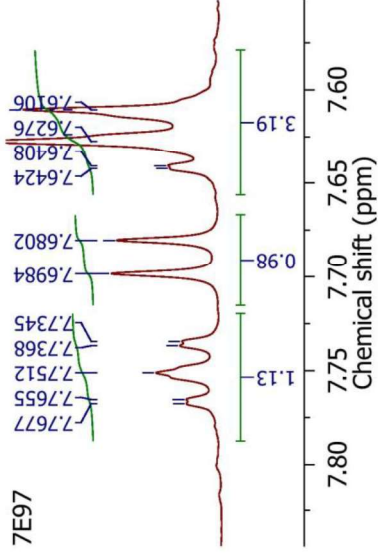

7E97

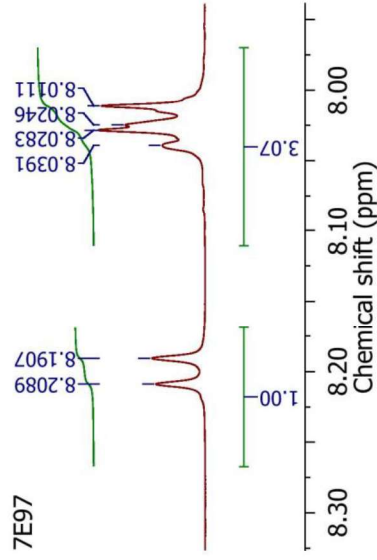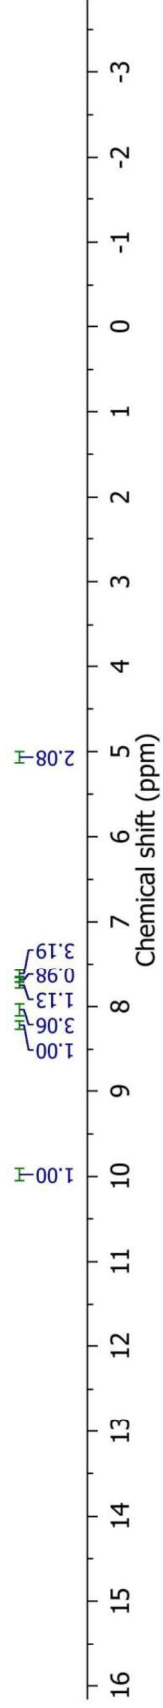

7E97

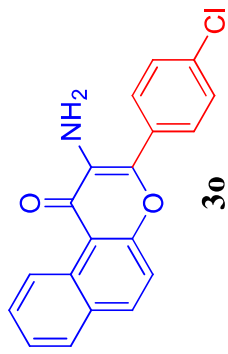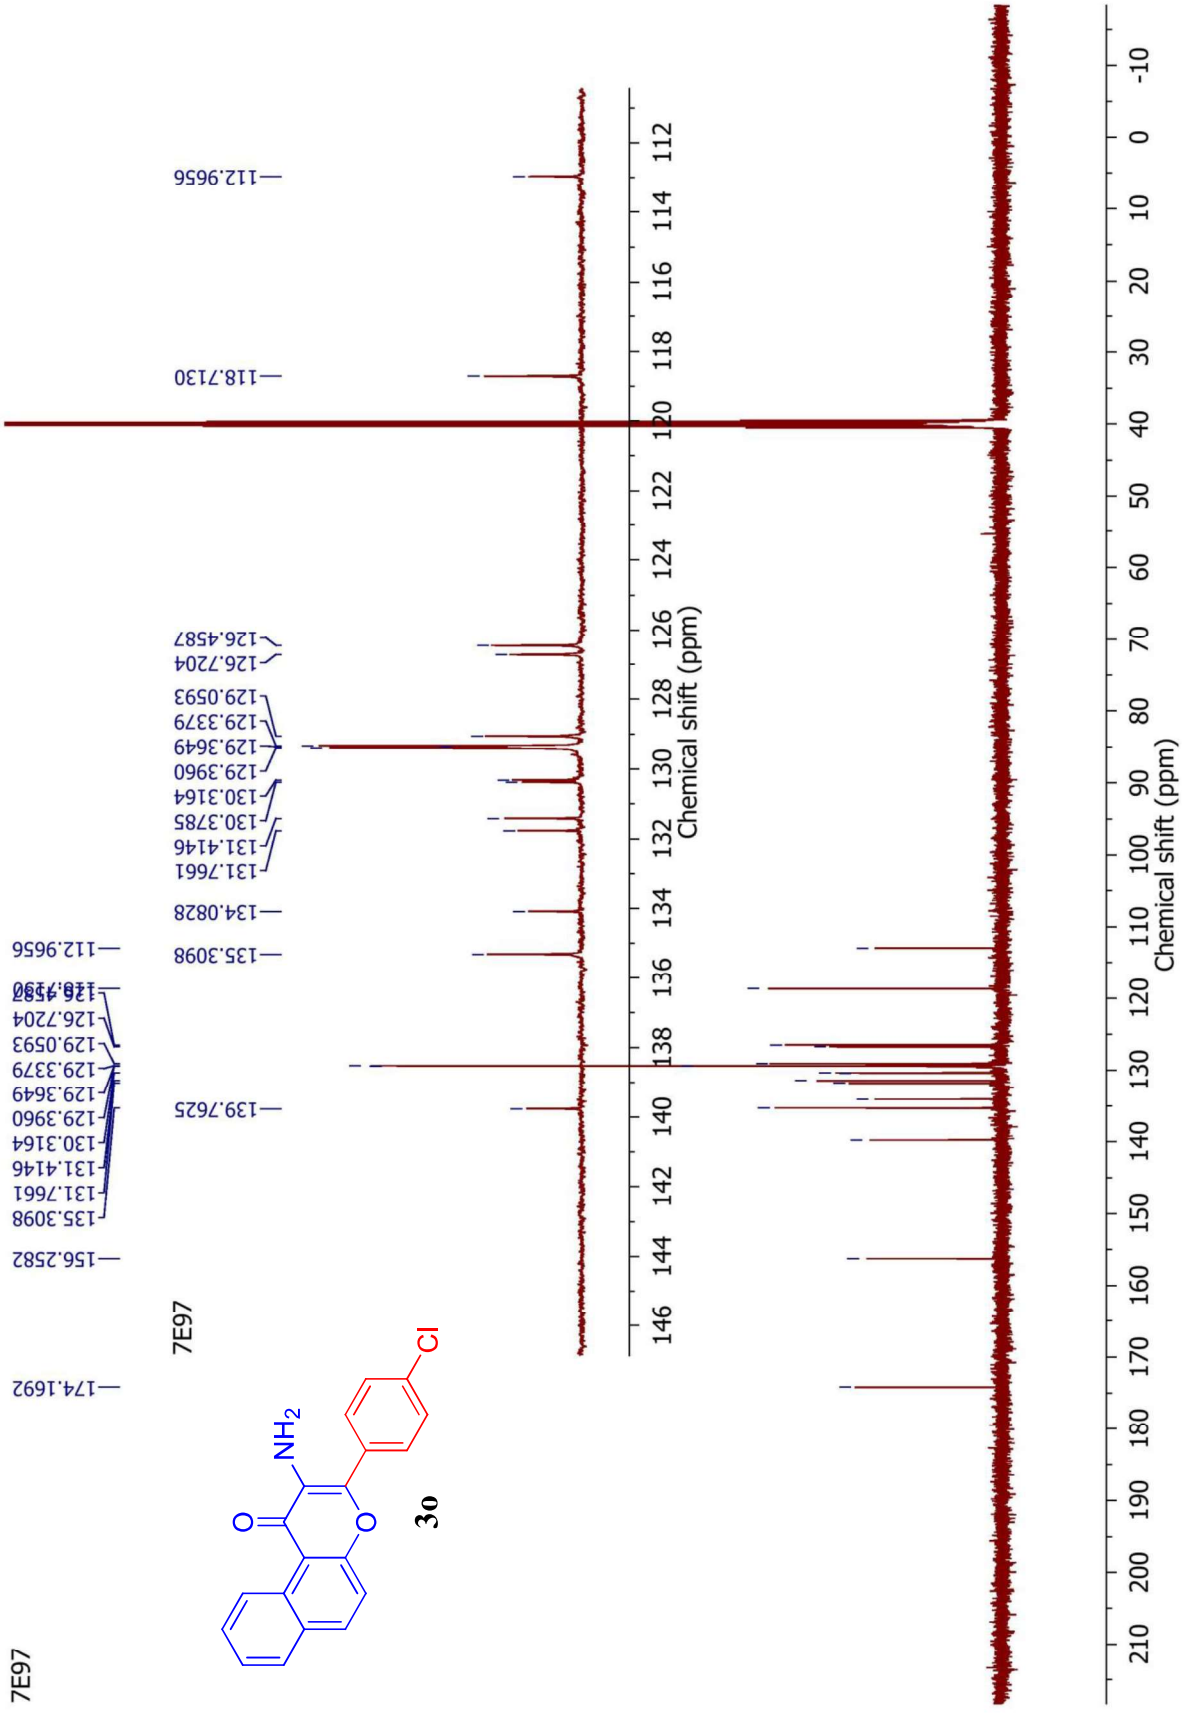



# Display Report

**Analysis Info**  
Analysis Name D:\Data\User Data\Dr. Jerome\MNTE97.d  
Method Tune\_pos\_Standard.m  
Sample Name BLANK  
Comment  
Acquisition Date 7/23/2019 12:13:38 PM  
Operator HRMS  
Instrument maxis impact 1819696.00160

**Acquisition Parameter**  
Source Type ESI  
Pulsed Active  
Scan Begin 50 m/z  
Scan End 3000 m/z  
Ion Polarity Positive  
Set Corona 4500 V  
Set End Plate Offset -500 V  
Set Charging Voltage 2000 V  
Set Corona 0 nA  
Set Nebuliser 0.5 Bar  
Set Dry Heater 200 °C  
Set Dry Gas 4.0 l/min  
Set Divert Valve Source  
Set APCI Heater 0 °C

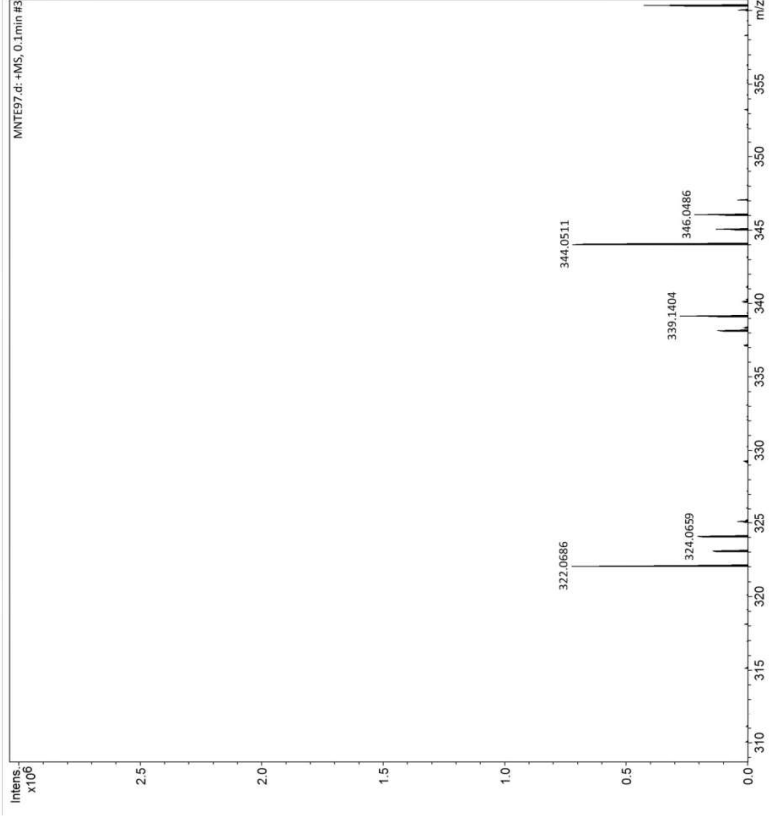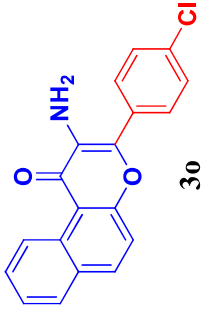

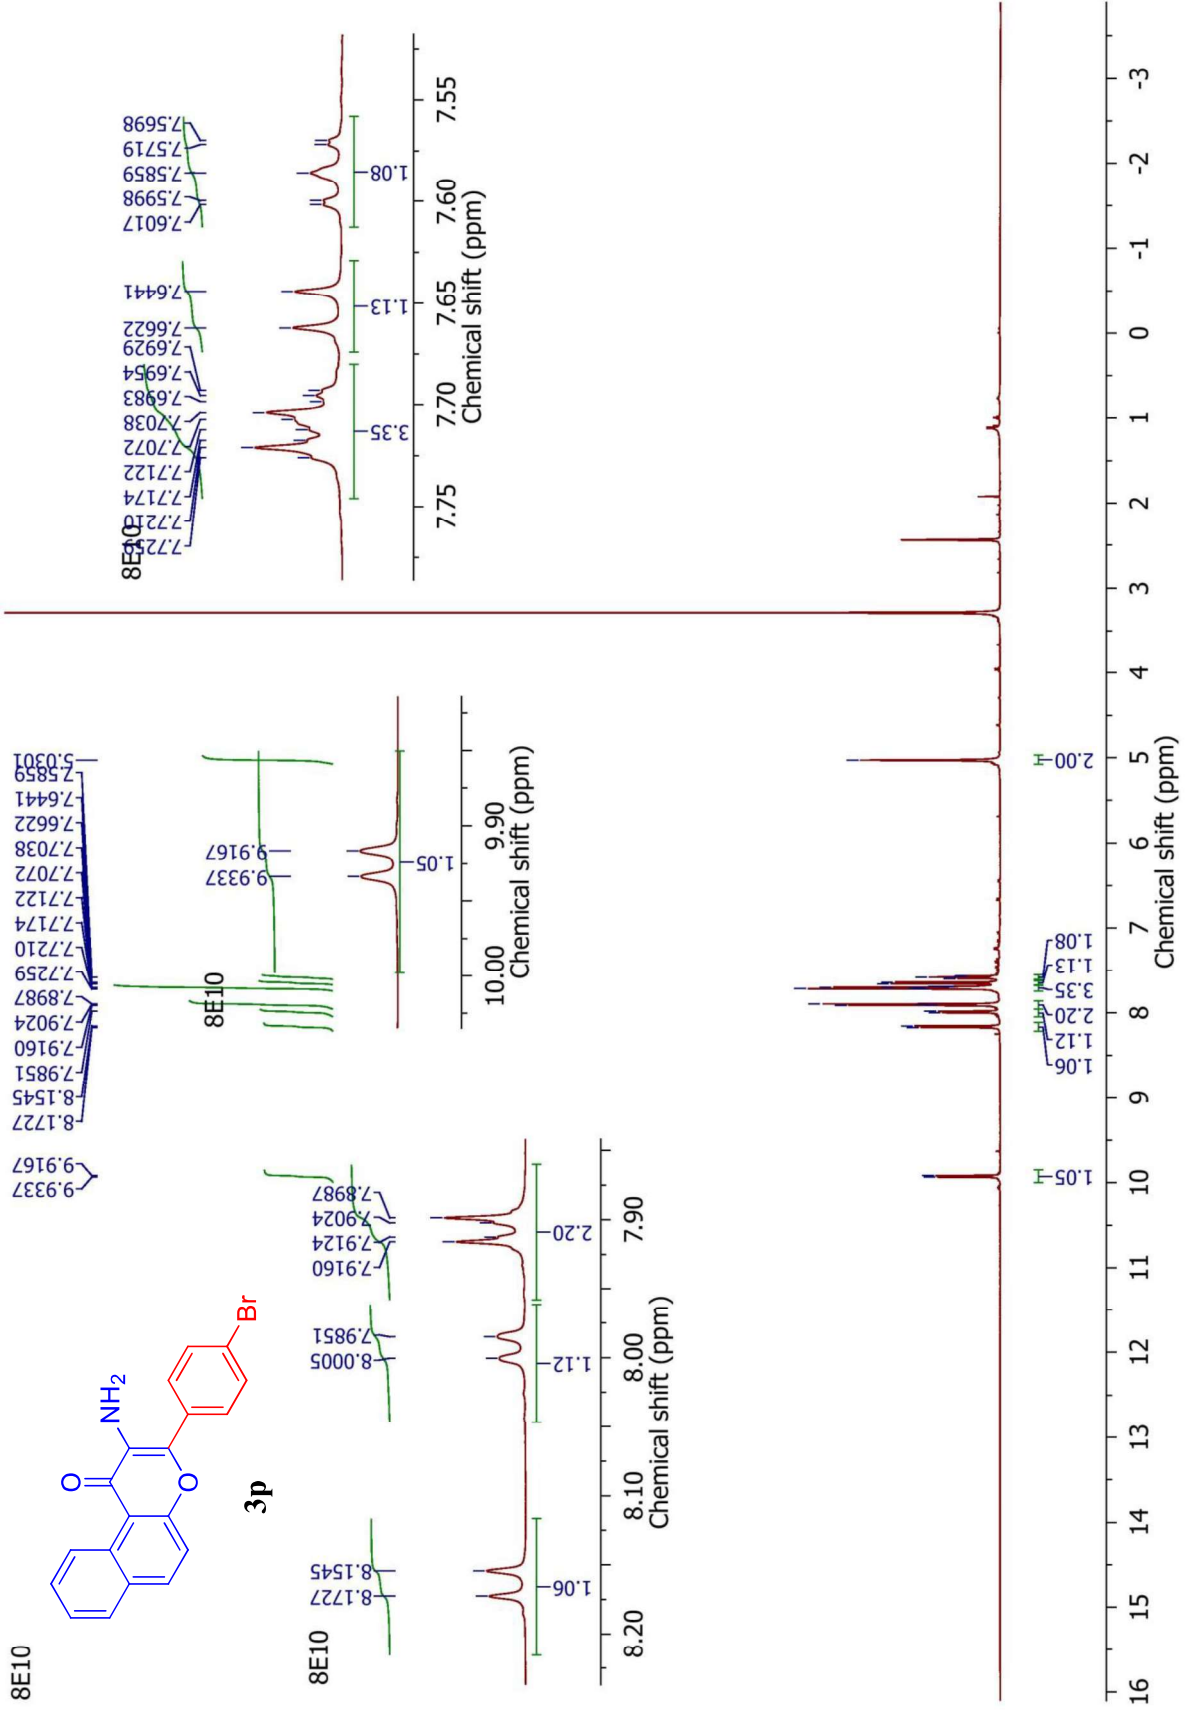

8E10

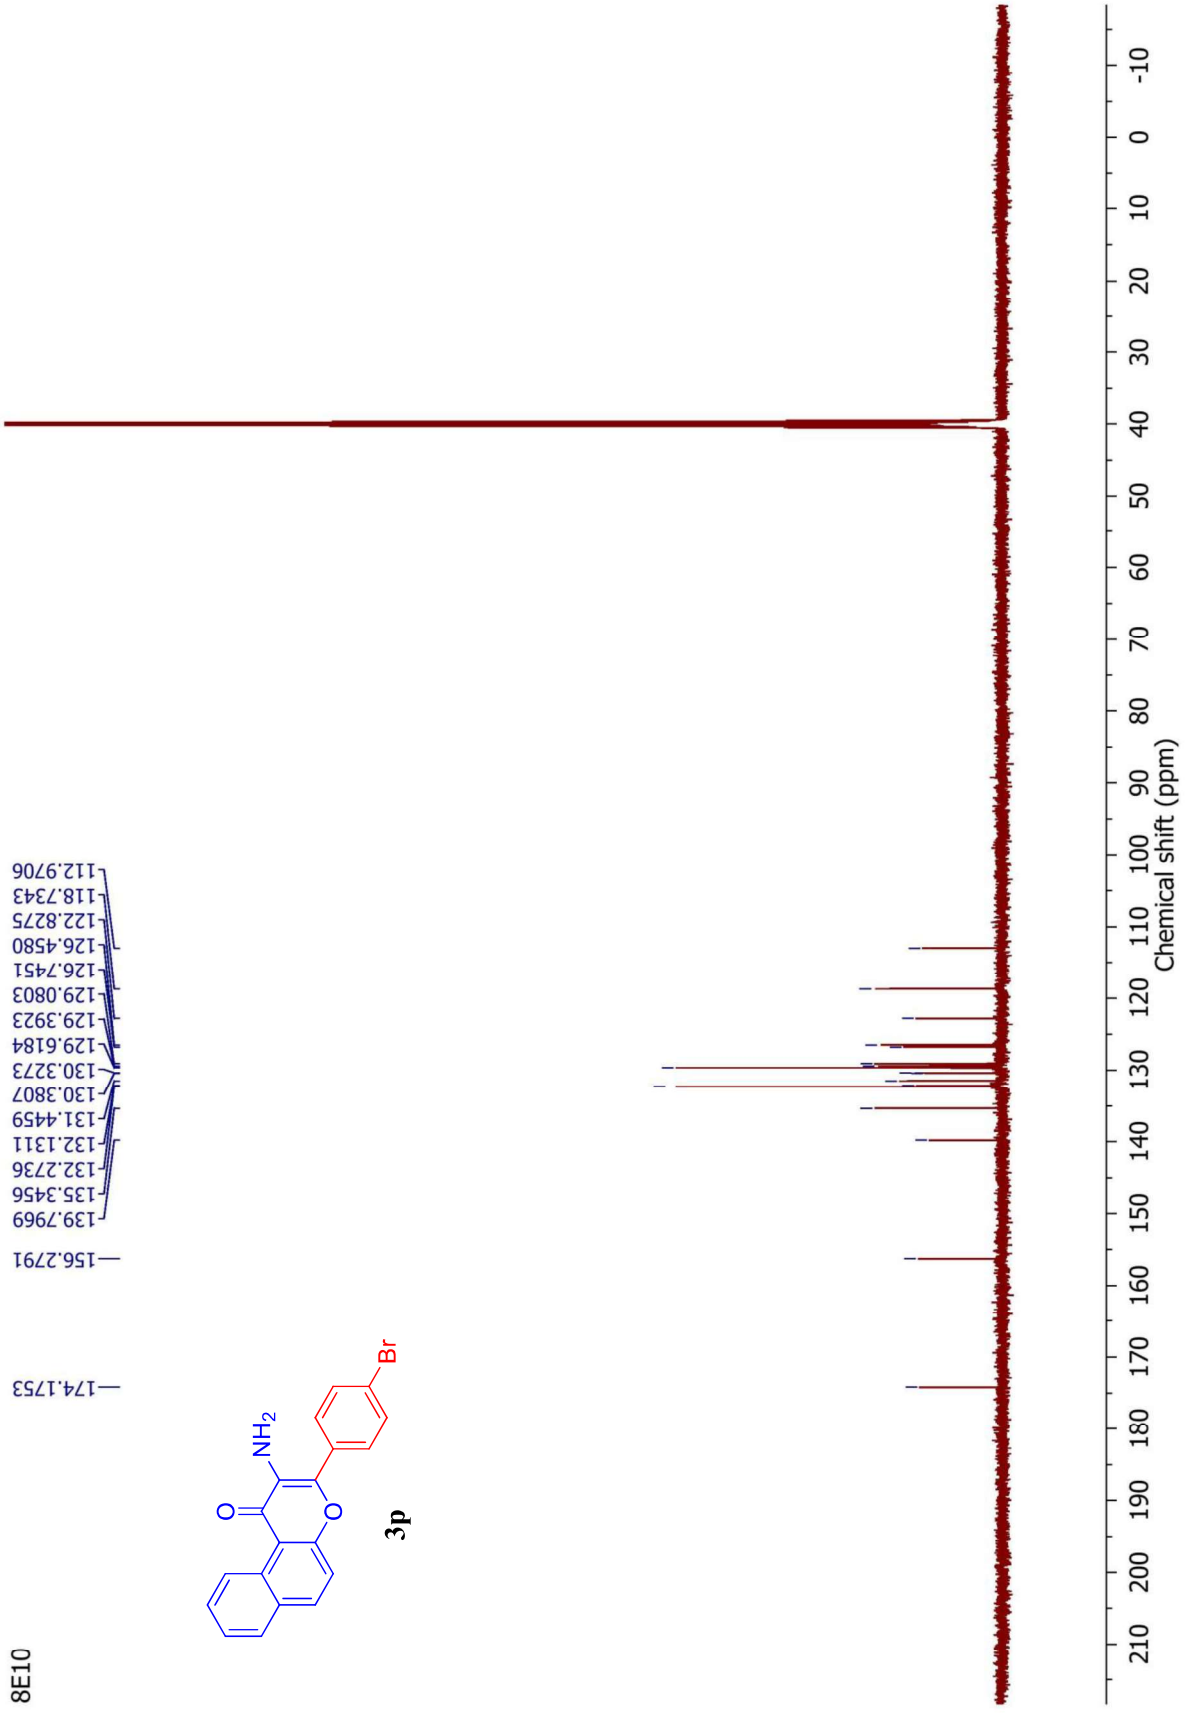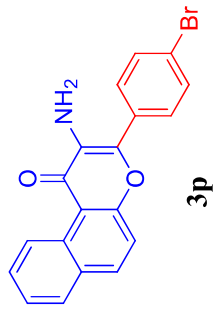

# Display Report

**Analysis Info**  
Analysis Name D:\Data\User Data\Dr.Jerome\MN8E10.d  
Method Tune\_pos\_Mid.m  
Sample Name MEOH  
Comment  
Acquisition Date 7/25/2019 10:57:32 AM  
Operator HRMS  
Instrument maxis impact 1819696.00160

**Acquisition Parameter**  
Source Type ESI  
ESI Active  
Tune\_pos\_Mid.m  
Scan Begin 100 m/z  
Scan End 5000 m/z  
Ion Polarity Positive  
Set Capillary 3500 V  
Set End Plate Offset -500 V  
Set Charging Voltage 2000 V  
Set Corona 0 nA  
Set Nebuliser 0.3 Bar  
Set Dry Heater 200 °C  
Set Dry Gas 4.0 l/min  
Set Divert Valve Source  
Set APCI Heater 0 °C

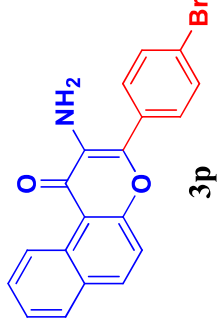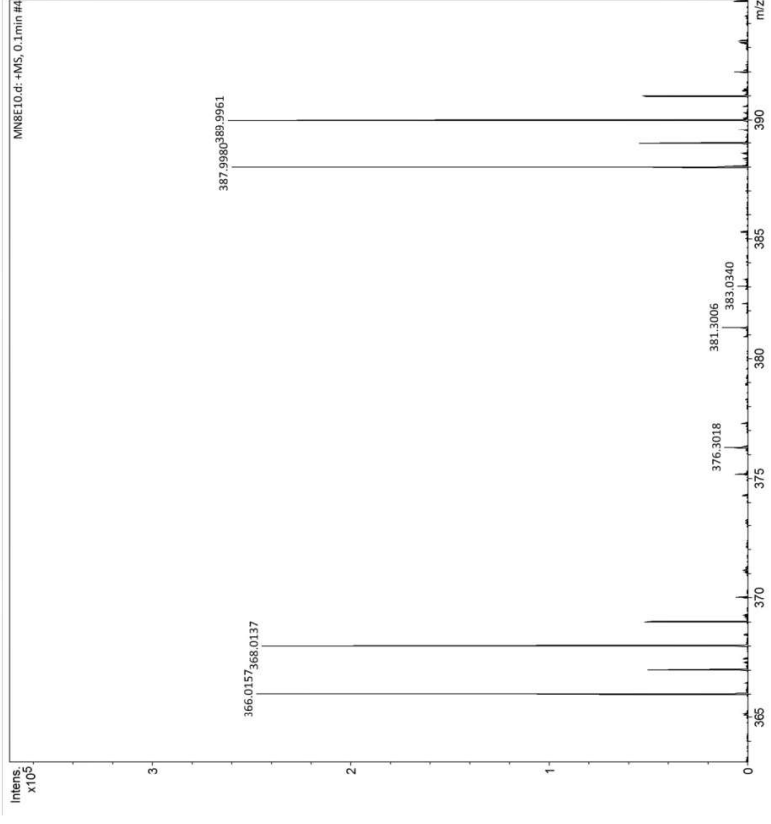

E934

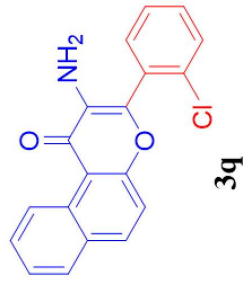

10.0559  
10.0389

8.2443  
8.2261  
8.0958  
8.0800  
7.8068  
7.7832  
7.7682  
7.7222  
7.7065  
7.6773  
7.6646  
7.6469  
7.6084  
7.5933  
7.5795  
7.5647  
4.7035

E934

7.8218  
7.8068  
7.7832  
7.7682  
7.7222  
7.7065  
7.6924  
7.6773  
7.6646  
7.6469  
7.6232  
7.6084  
7.5933  
7.5795  
7.5647  
7.5497

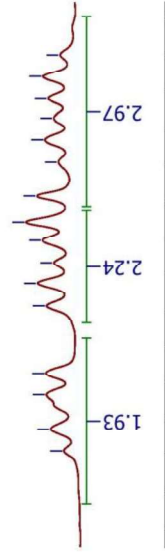

E934

10.0559  
10.0389

E934

8.0958  
8.0800

7.8068  
7.7832  
7.7682

7.6084  
7.5933

7.5497

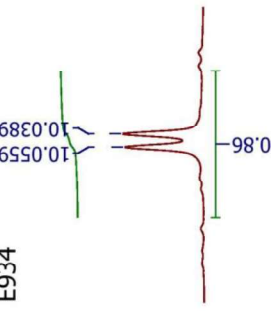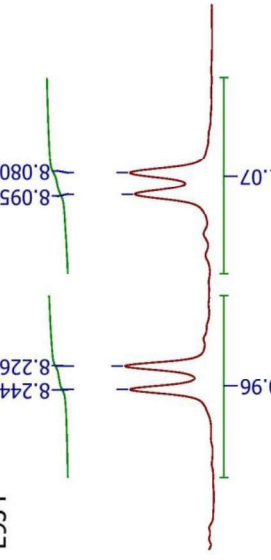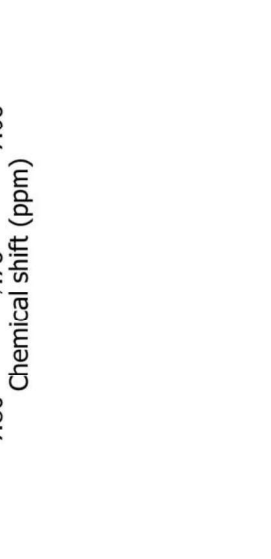

10.2 10.1 10.0 9.9  
Chemical shift (ppm)

8.35 8.25 8.15 8.05  
Chemical shift (ppm)

7.80 7.70 7.60  
Chemical shift (ppm)

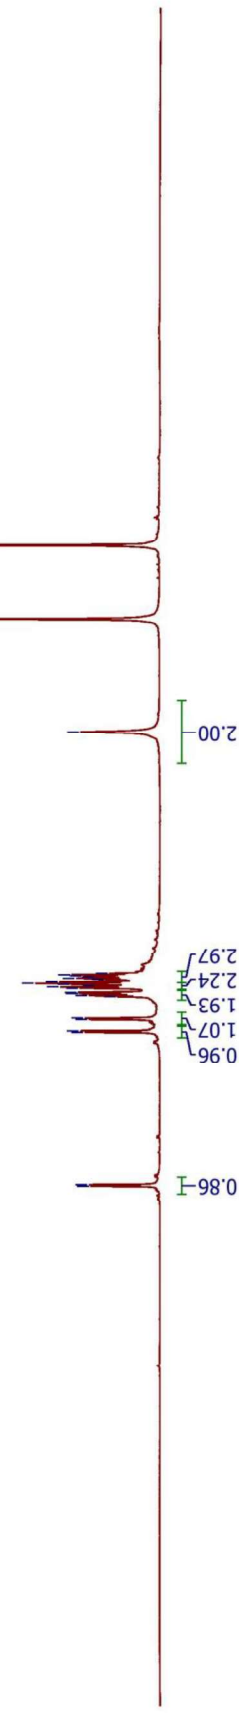

16 15 14 13 12 11 10 9 8 7 6 5 4 3 2 1 0 -1 -2 -3  
Chemical shift (ppm)

E934

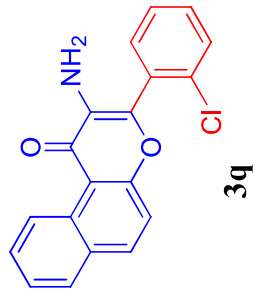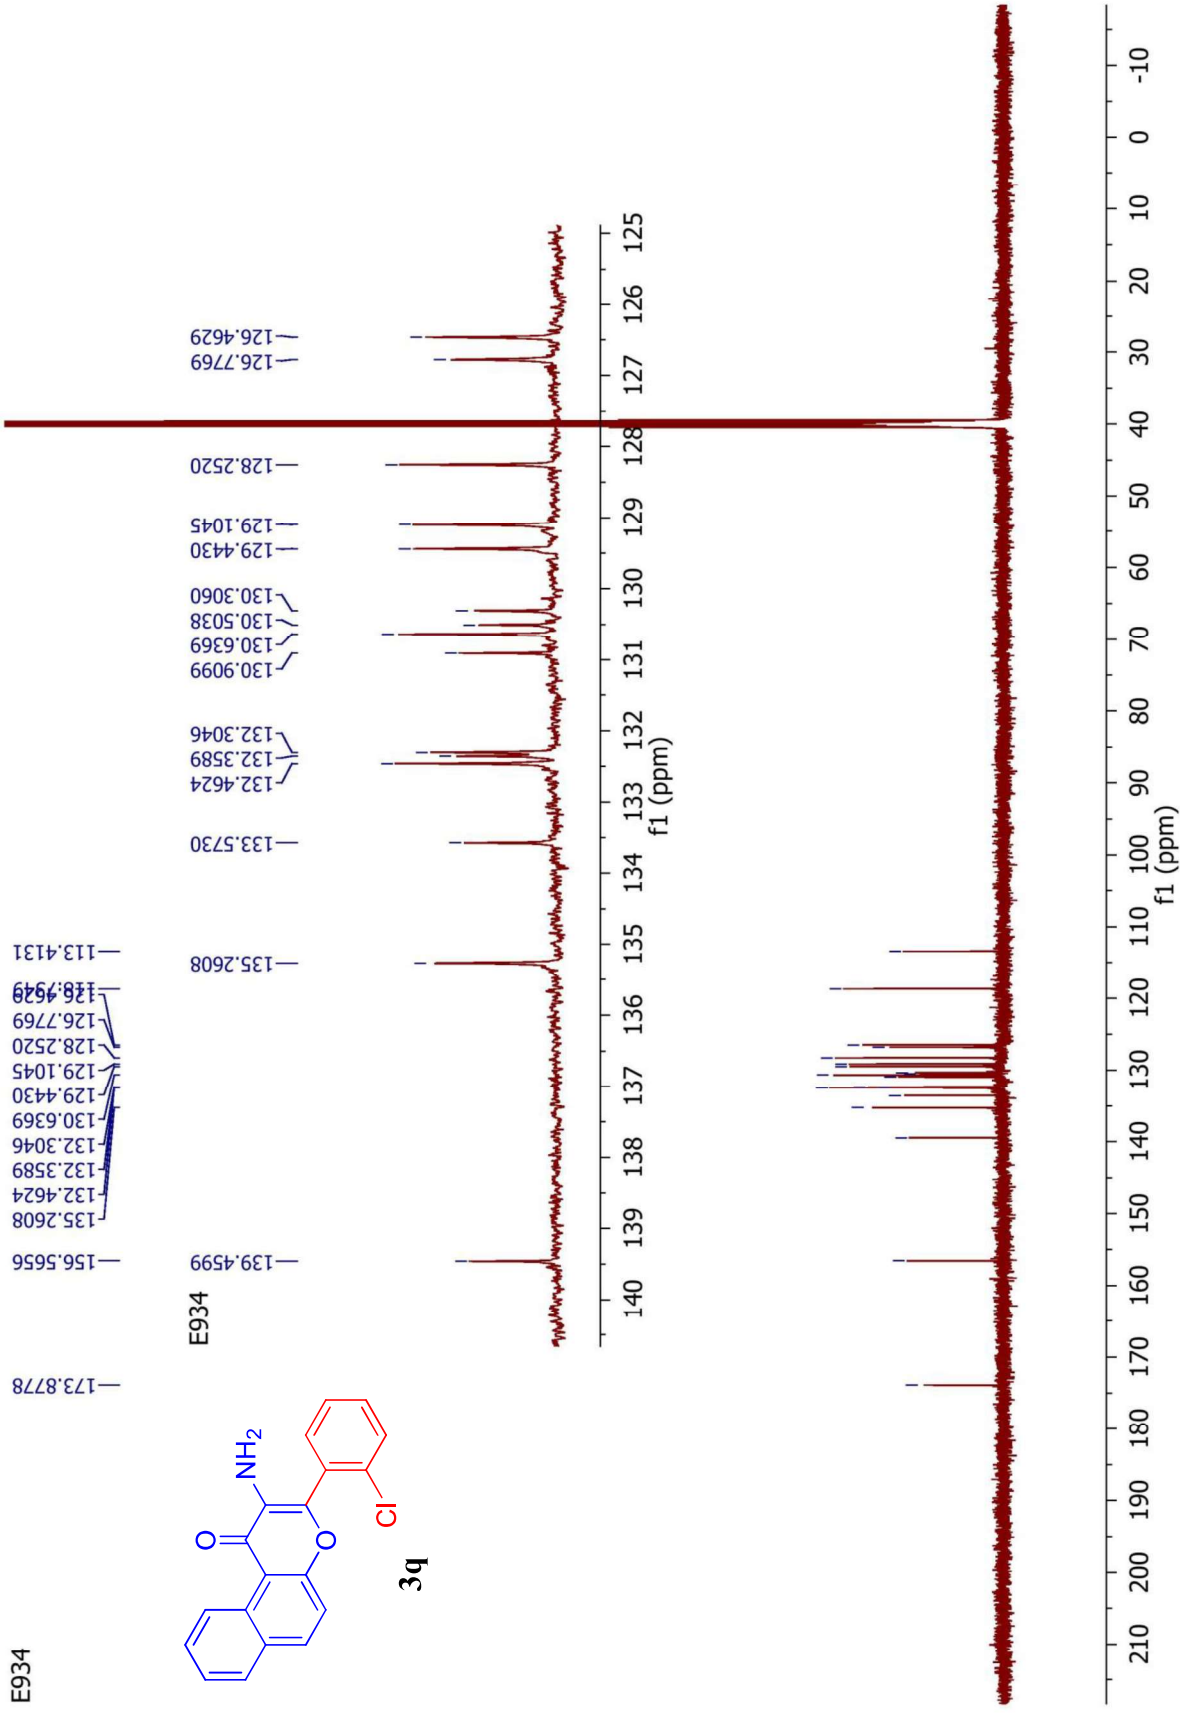

Sample Name Seenuvasan (1113) Position Vial 36 User Name  
Inj Vol 1 InjPosition ACQ Method ISOCRATIC.m Instrument Name  
Data Filename SVM-30.d SVM-30.d Instrument Type Sample IRM Calibration Status Success  
Comment 12/6/2019 1:25:21 PM  
Acquired Time

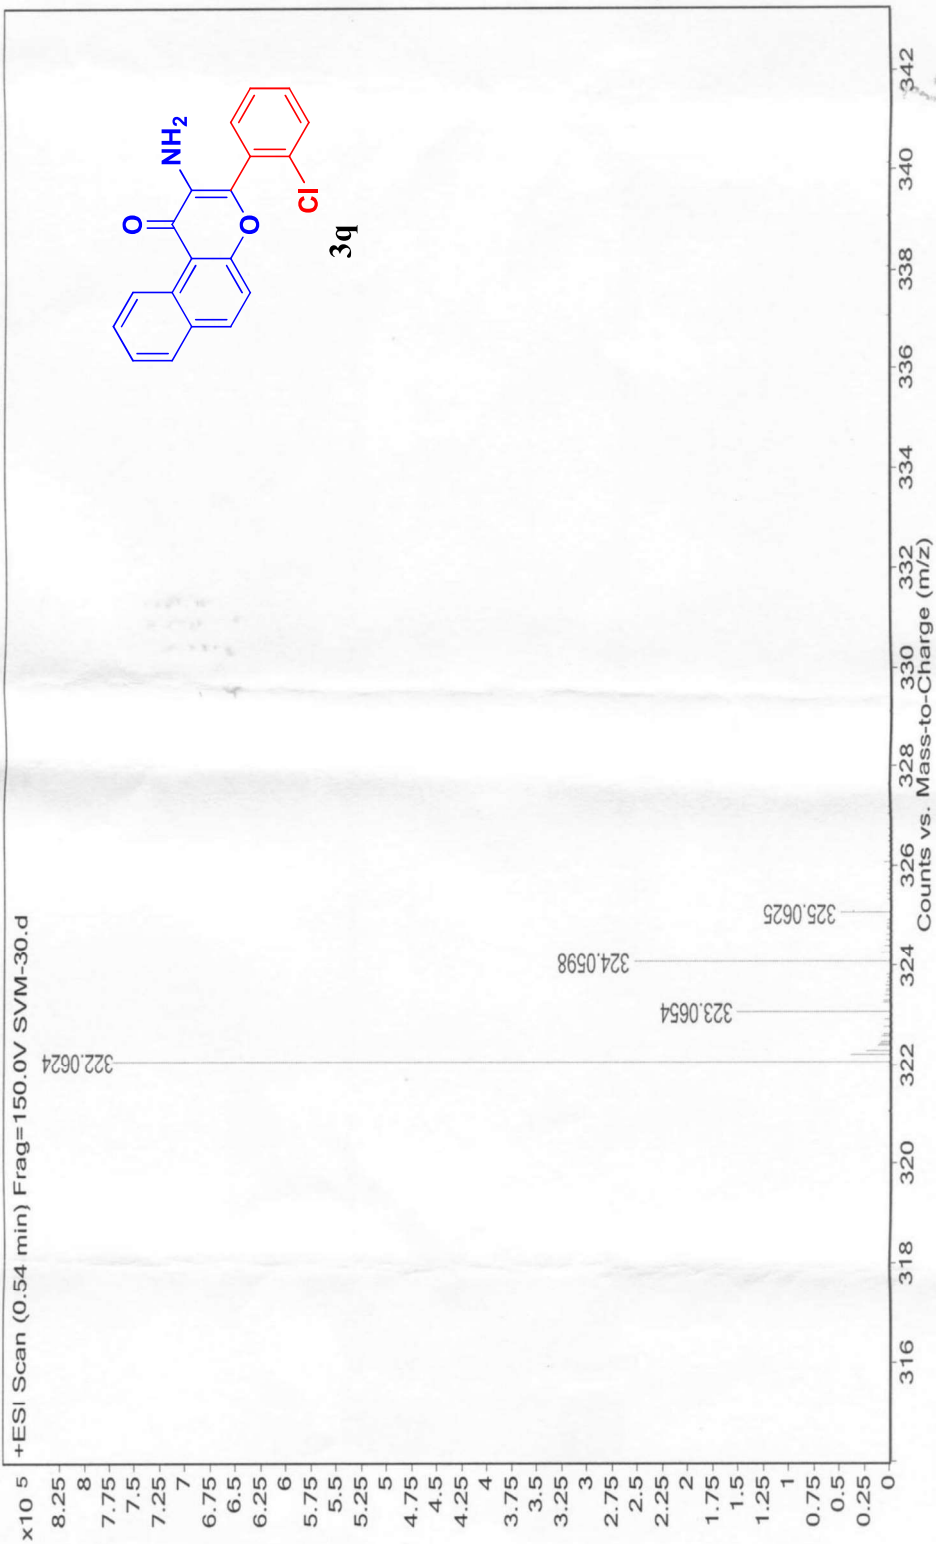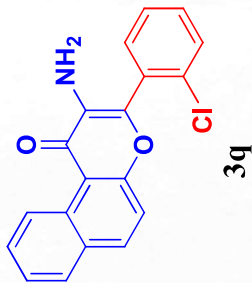



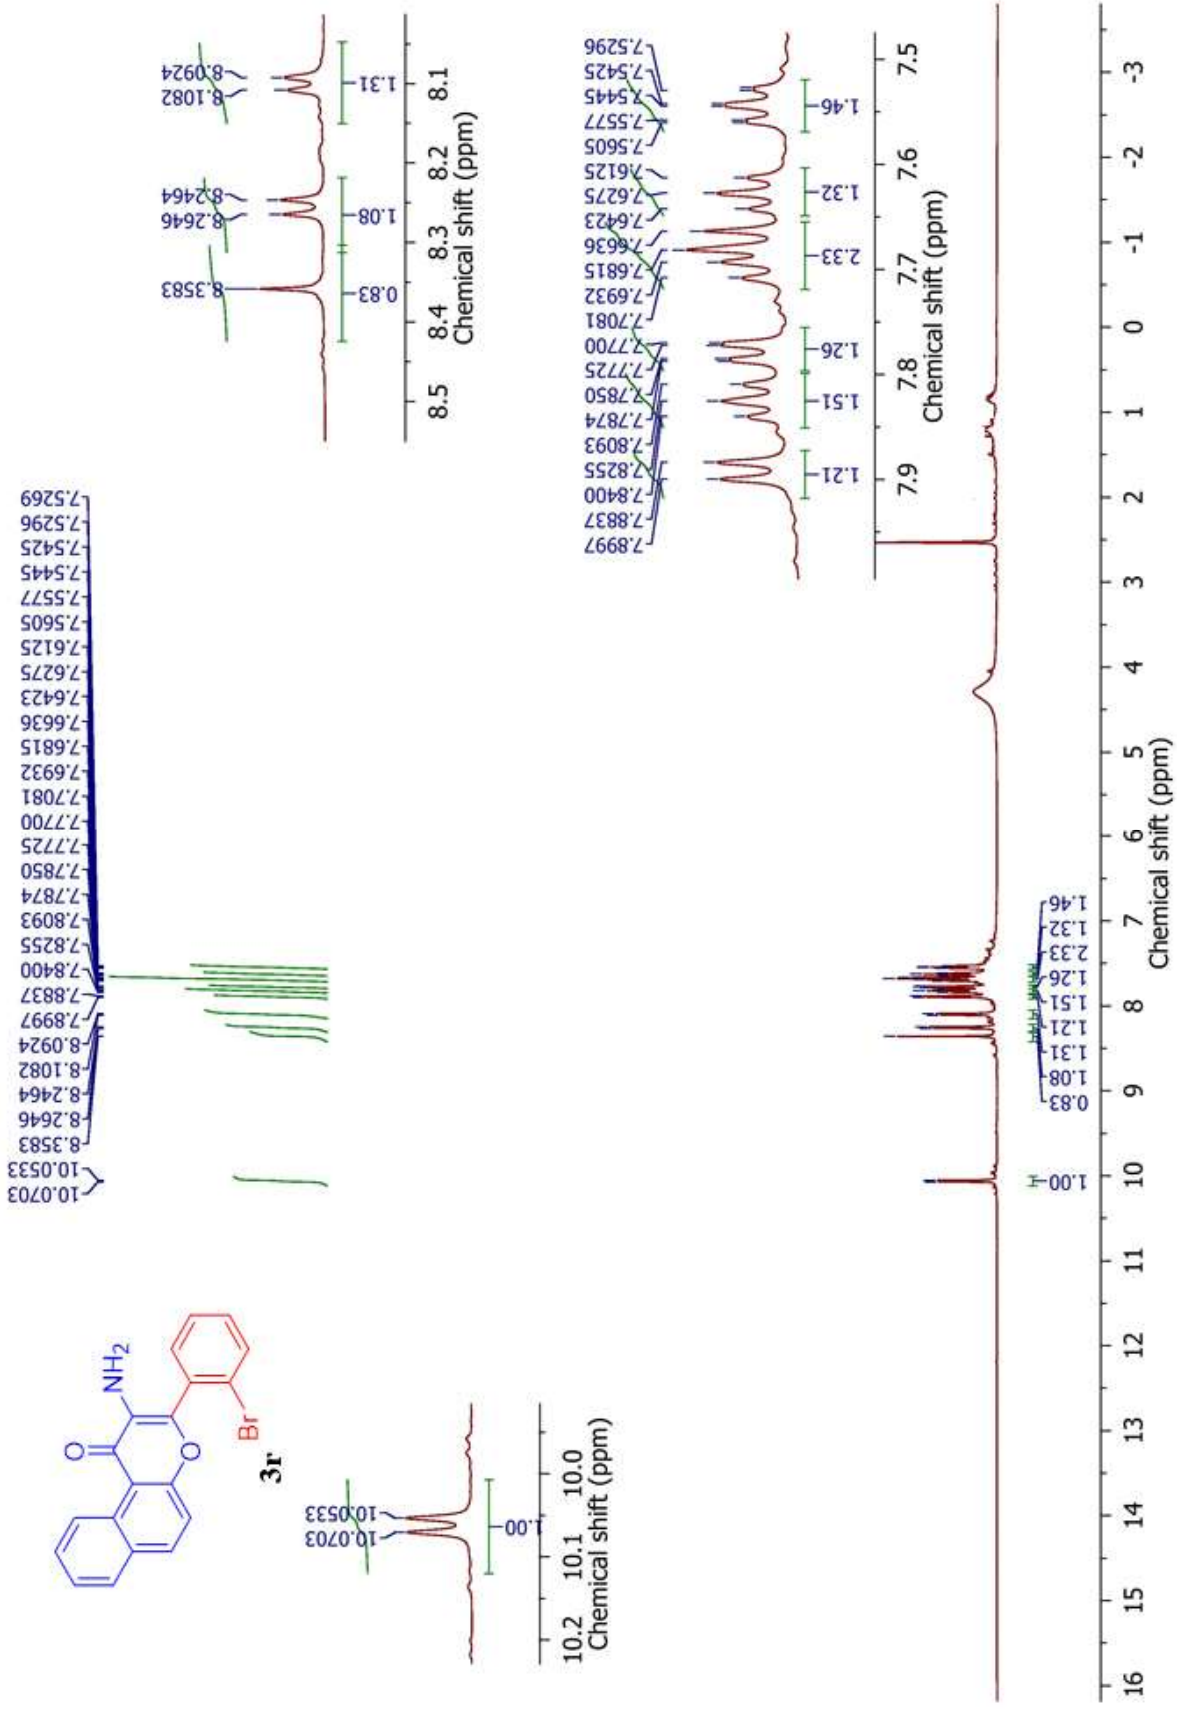

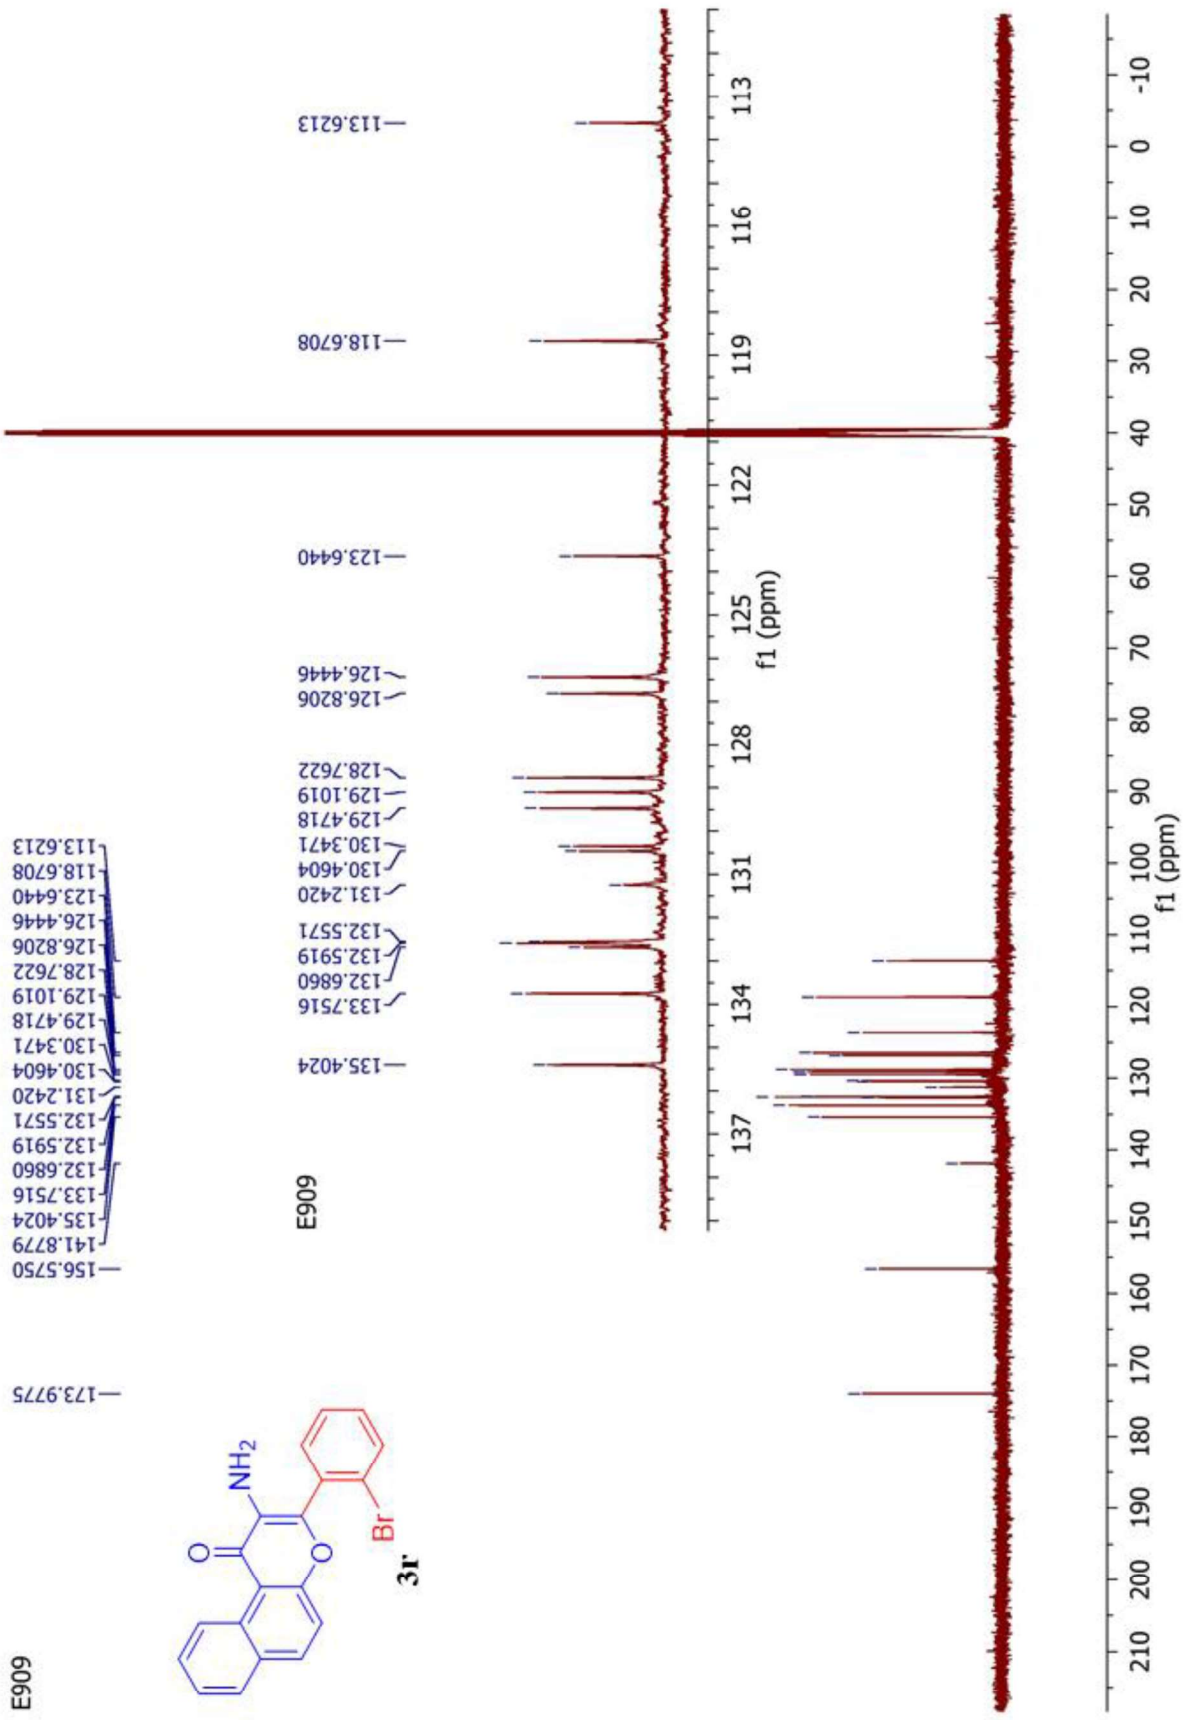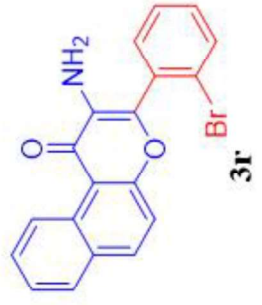

E909

E909

Sample Name: Seenuvasan (1113)    Vial 32    User Name: Success  
 Inj Vol: 1    InjPosition: ISOCRATIC.m    Instrument 1: Sample    IRM Calibration Status: 12/6/2019 1:10:50 PM  
 Data Filename: SVM-26.d    ACQ Method: ISOCRATIC.m    Instrument Name: SampleType    Comment: Acquired Time

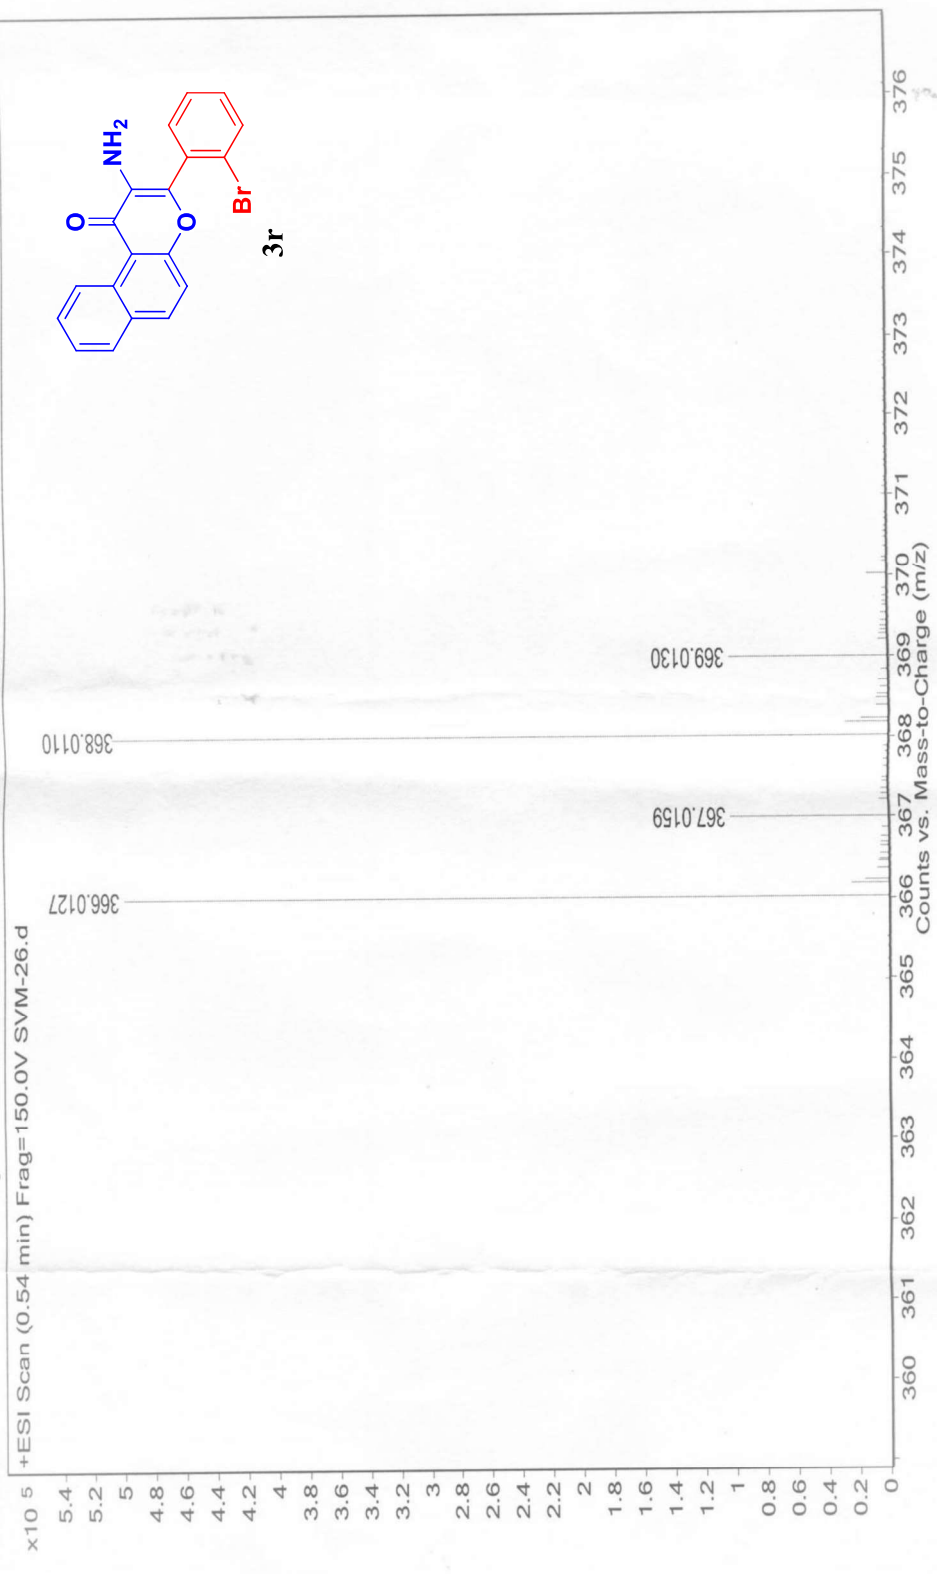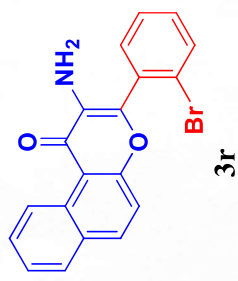

E1074

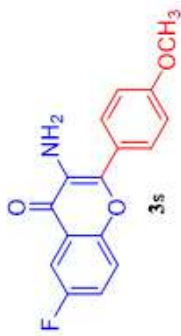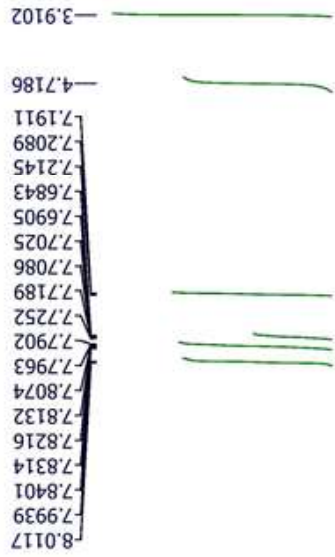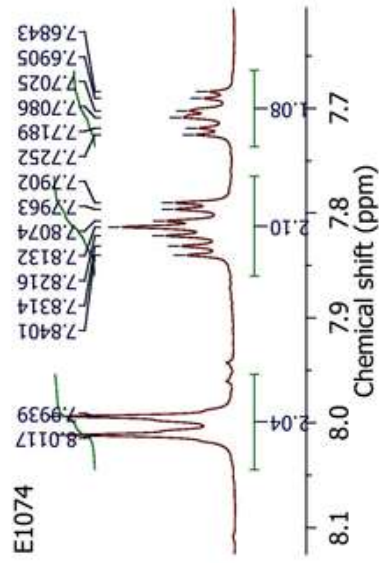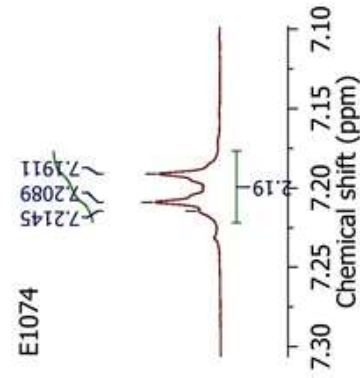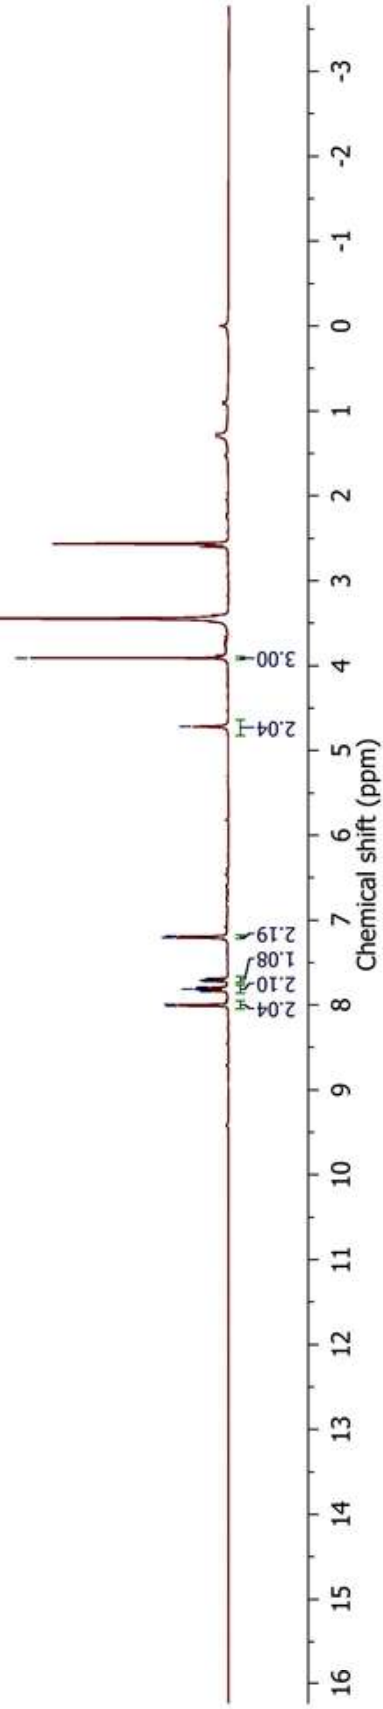

E1074

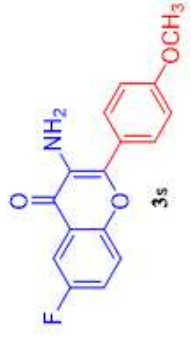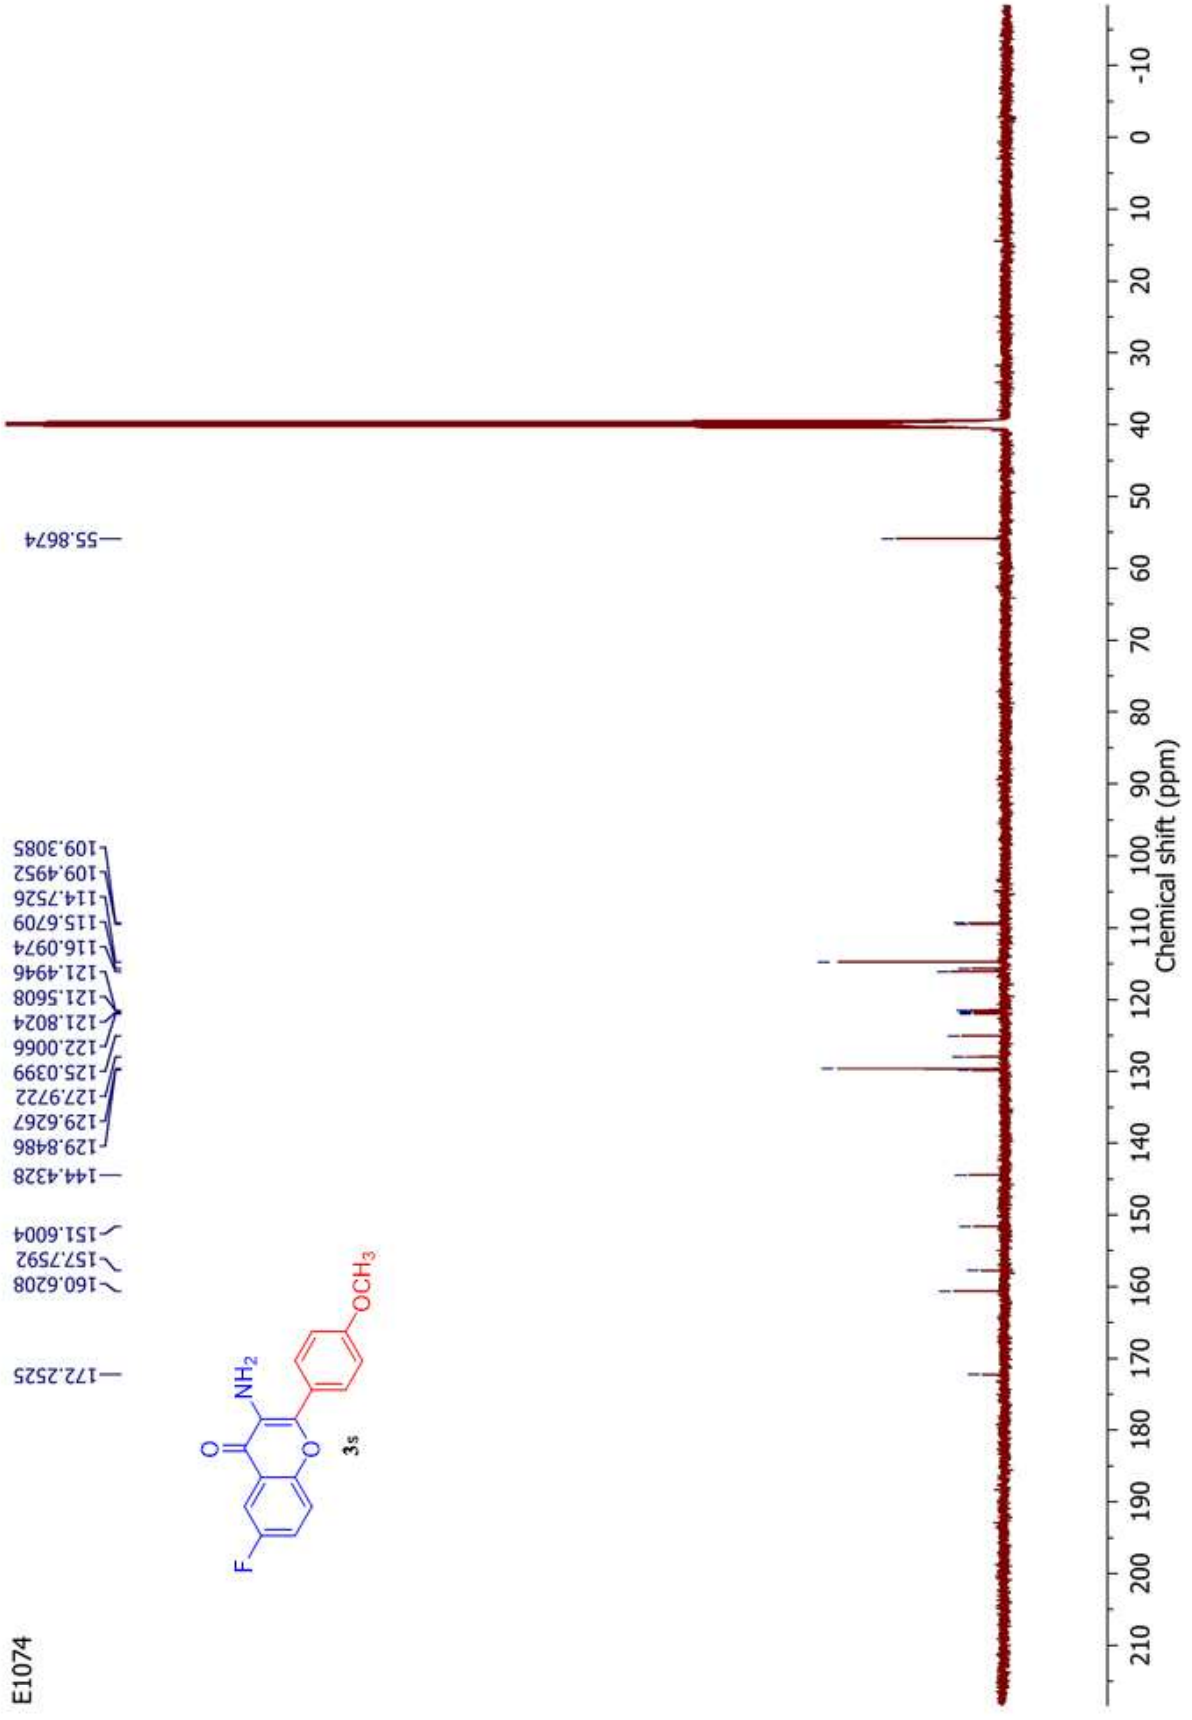

E991

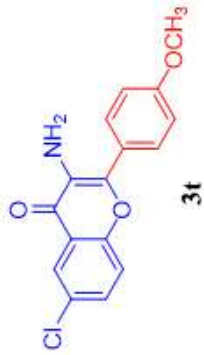

8.0086  
8.0038  
7.9416  
7.9375  
7.9278  
7.9237  
7.7670  
7.7619  
7.7490  
7.7439  
7.7229  
7.7050  
7.1467  
7.1410  
7.1370  
7.1271  
7.1230  
7.1171  
4.6906  
3.8510

E991

8.0086  
8.0038  
7.9416  
7.9375  
7.9278  
7.9237

7.7670  
7.7619  
7.7490  
7.7439  
7.7229  
7.7050

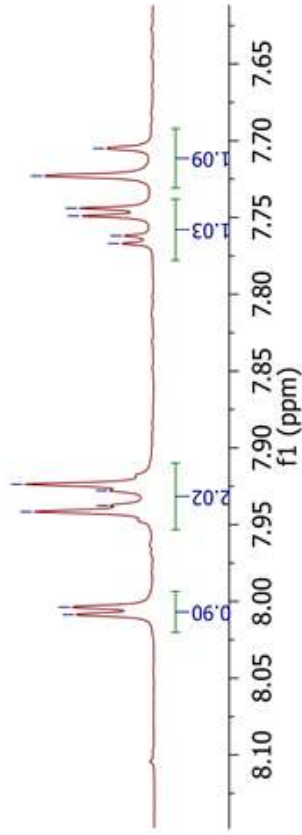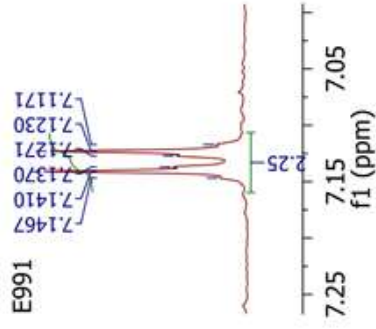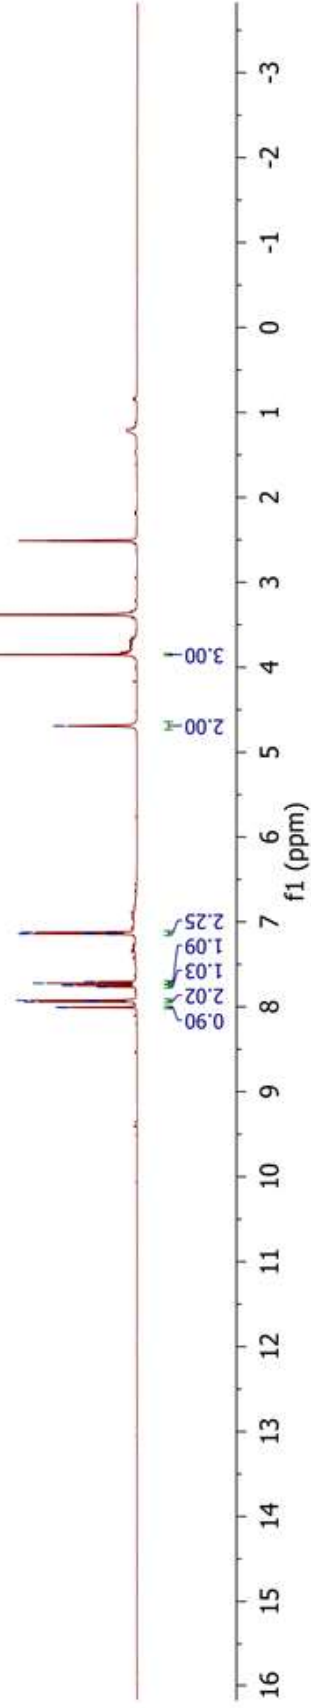

E991

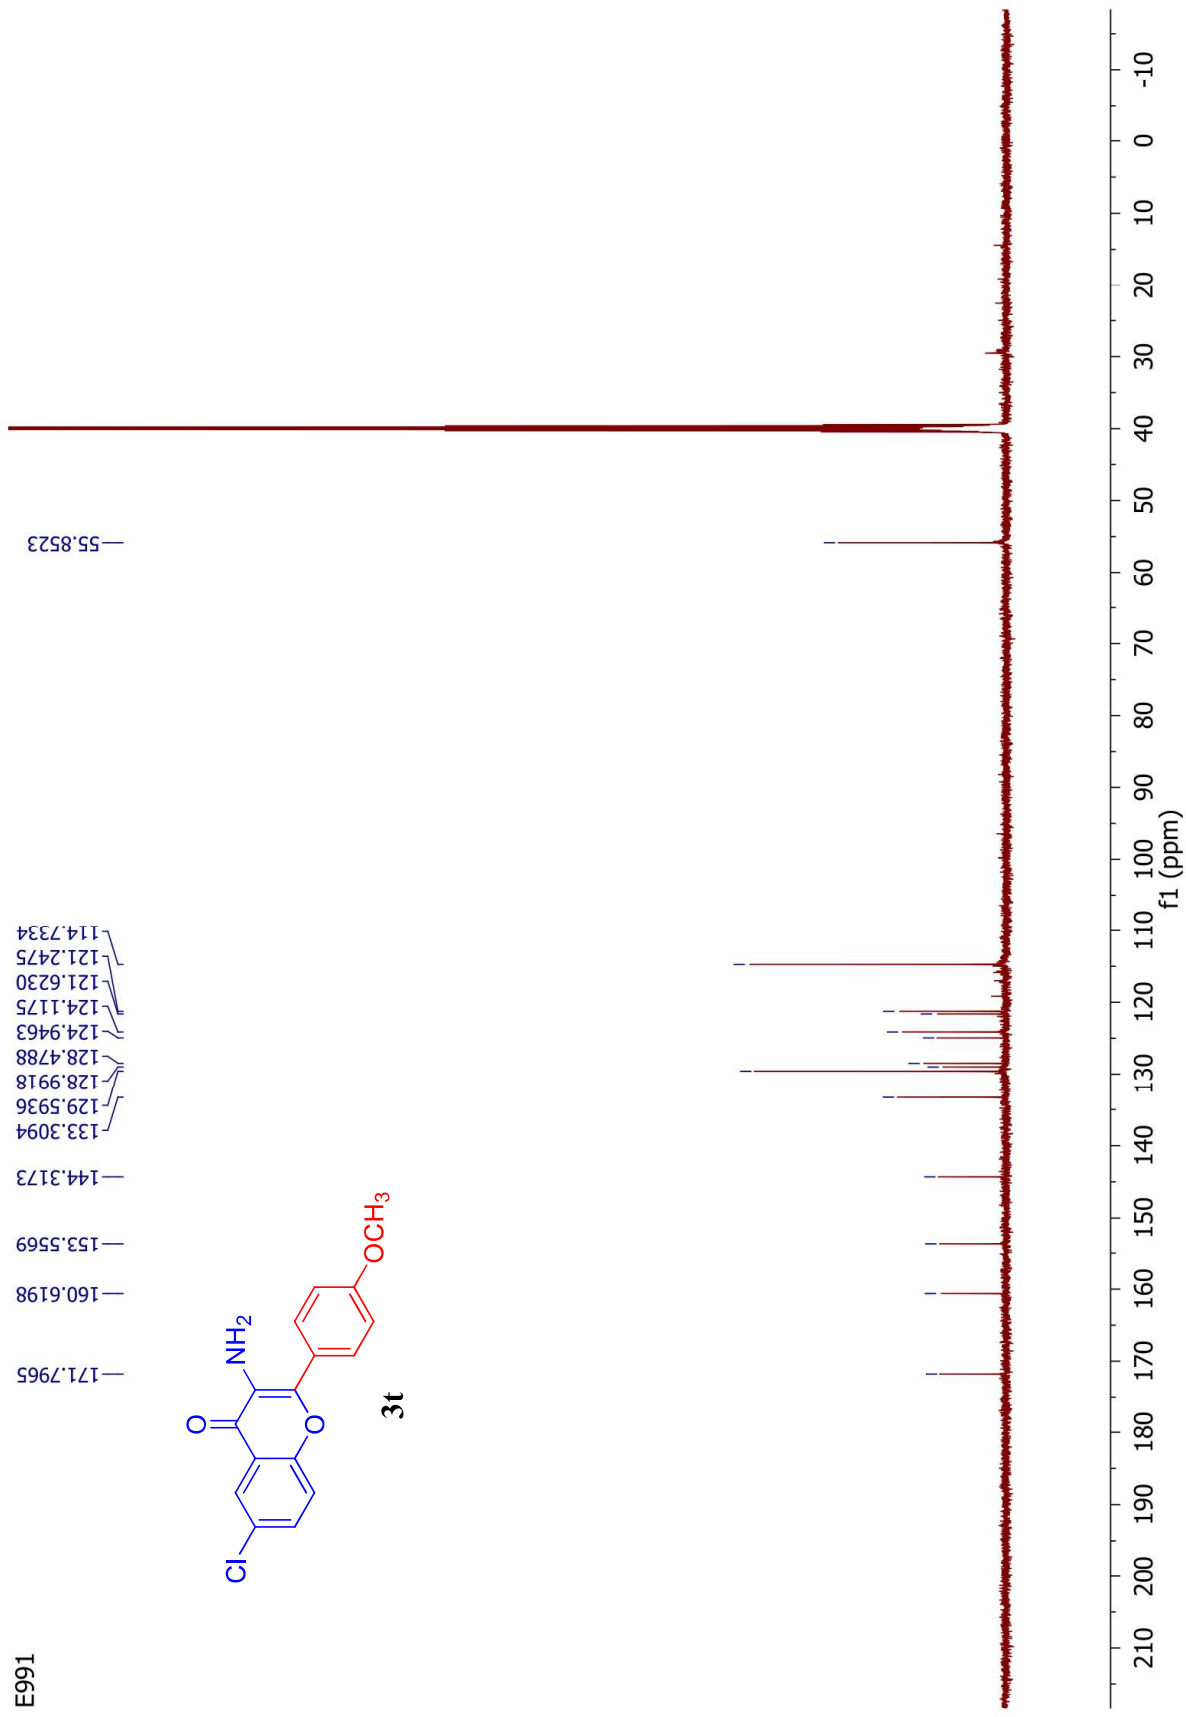



Sample Name: Seenivasan (1113)    Vial: 45    Instrument Name: Instrument 1    User Name: Success  
 Inj Vol: 1    InjPosition: ISOCRATIC.m    SampleType: Sample    IRM Calibration Status: 12/6/2019 1:58:12 PM  
 Data Filename: SVM-38.d    ACQ Method: ISOCRATIC.m    Comment:    Acquired Time:

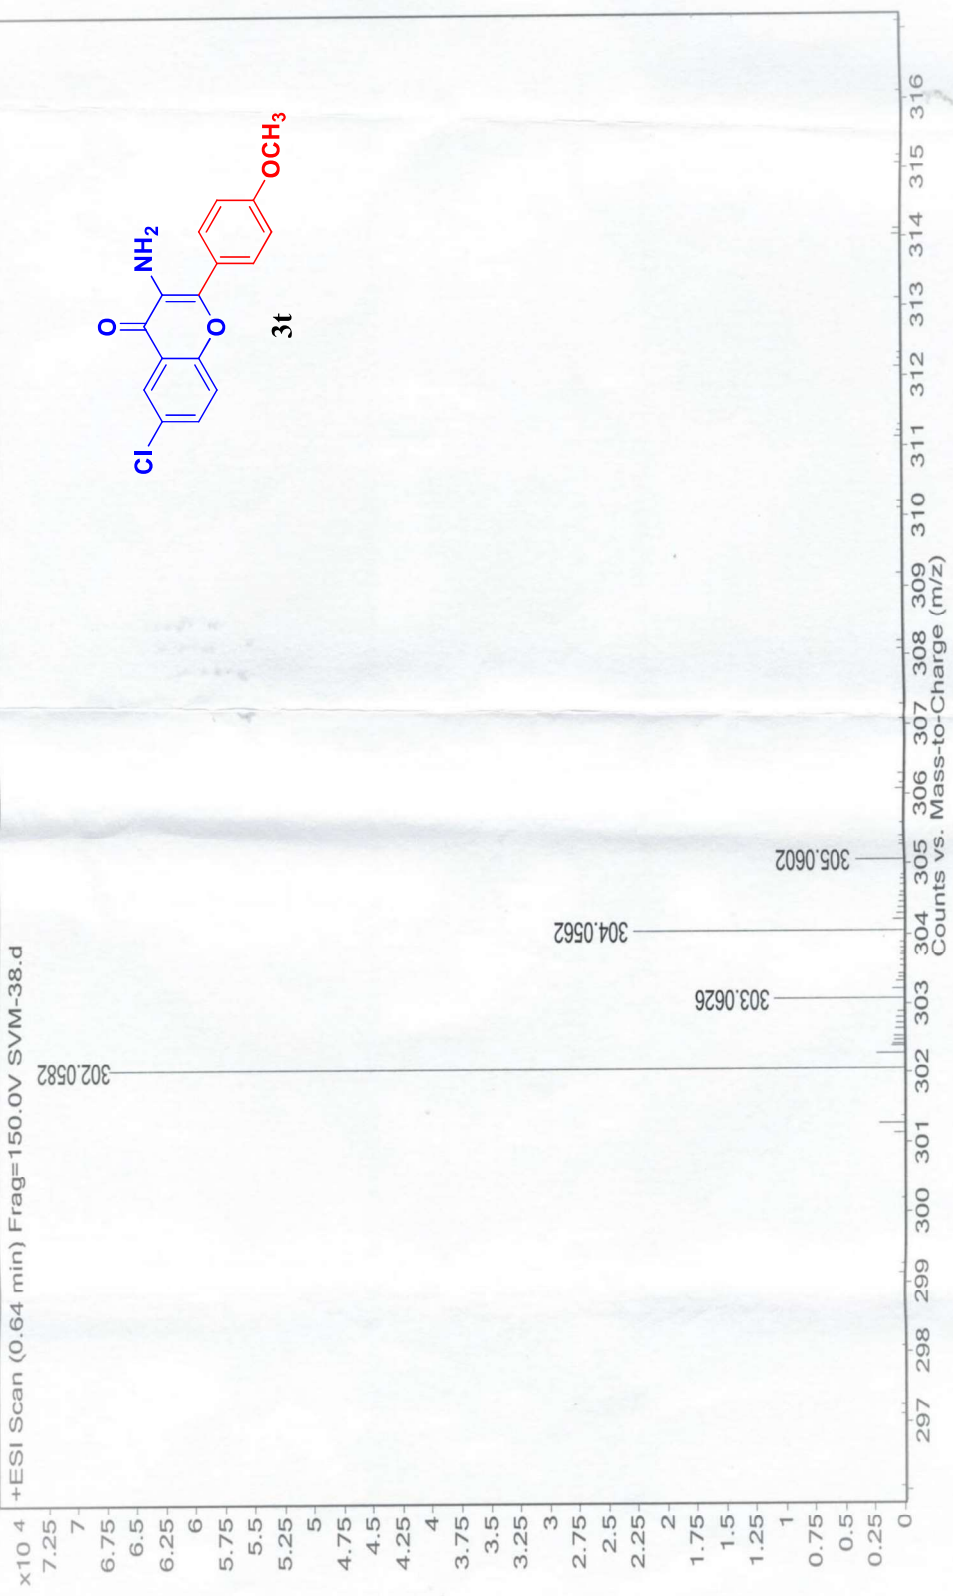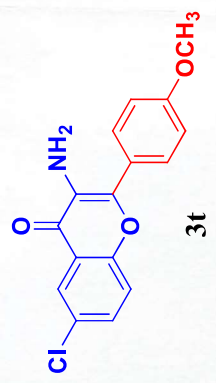

Supplement: d0ob01689f1.pdf [file d0ob01689f1.pdf]
